# Supplementary material for: Synthetic strategy and antiviral evaluation of diamide containing heterocycles targeting dengue and yellow fever virus
Source: PubMed Central journal article supplement (PMC4999056; doi:10.1016/j.ejmech.2016.05.043), 2016-10-04

## Supporting Information

### Synthetic strategy and antiviral evaluation of diamide containing heterocycles targeting dengue and yellow fever virus

Milind Saudi<sup>a</sup>, Joanna Zmurko<sup>b</sup>, Suzanne Kaptein<sup>b</sup>, Jef Rozenski<sup>a</sup>, Bharat Gadakh<sup>a</sup>,  
Patrick Chaltin<sup>c,d</sup>, Arnaud Marchand<sup>c</sup>, Johan Neyts<sup>b</sup>, Arthur Van Aerschot<sup>a\*,∞</sup>

<sup>a</sup> KU Leuven, Medicinal Chemistry, Rega Institute for Medical Research,  
Minderbroedersstraat 10, 3000 Leuven, Belgium

<sup>b</sup> KU Leuven, Laboratory of Virology and Chemotherapy, Rega Institute for Medical  
Research, Minderbroedersstraat 10, 3000 Leuven, Belgium

<sup>c</sup> CISTIM Leuven vzw, Gaston Geenslaan 2, 3001 Leuven Belgium

<sup>d</sup> Centre for Drug Design and Discovery (CD3), KULeuven Research and  
Development, Waaistraat 6, 3000 Leuven, Belgium

### List of contents

|                                                            |        |
|------------------------------------------------------------|--------|
| General Information.....                                   | S2     |
| HRMS, <sup>1</sup> H and <sup>13</sup> C NMR spectra ..... | S3-S69 |

## General Information

Reagents and solvents were purchased from commercial suppliers (Acros, Sigma-Aldrich, Bachem, Novabiochem) and used as provided, unless indicated otherwise. All the solvents were of analytical grade and were stored over 4Å molecular sieves. Reactions were carried out in oven-dried glassware under a nitrogen atmosphere with stirring at 85°C.

<sup>1</sup>H and <sup>13</sup>C NMR spectra of the compounds dissolved in CDCl<sub>3</sub>, MeOD or DMSO-d<sub>6</sub> were recorded on a Bruker UltraShield Avance 300 MHz or 500 MHz spectrometer. The chemical shifts are expressed as δ values in parts per million (ppm), using the residual solvent peaks (CDCl<sub>3</sub>: <sup>1</sup>H, 7.26 ppm; <sup>13</sup>C, 77.00 ppm; MeOD: <sup>1</sup>H, 3.31 ppm; <sup>13</sup>C, 49.00 ppm) as a reference. Coupling constants are given in Hertz (Hz). The peak patterns are indicated by the following abbreviations: bs = broad singlet, d = doublet, m = multiplet, q = quadruplet, s = singlet and t = triplet.

Spectra were acquired on a quadrupole orthogonal acceleration time-of-flight mass spectrometer (Synapt G2 HDMS, Waters, Milford, MA). Samples were infused at 3 μL.min<sup>-1</sup> and spectra were obtained in positive (or negative) ionization mode with a resolution of 15000 (FWHM) using leucine enkephalin as lock mass.

For TLC, precoated aluminium sheets were used (Merck, Silica gel 60 F<sub>254</sub>). The spots were visualized by UV light at 254 nm. Column chromatography was performed on ICN silica gel 60A° 40-60 μM.

This supporting information provides the <sup>1</sup>H and <sup>13</sup>C NMR and HRMS spectra for all new final compounds with numbering according to the manuscript. NMR spectra were not decoupled for fluorine, and especially carbon spectra are often difficult to interpret with in some cases double signals for rotamers and fluorine coupled carbon signals, leading often to missing signals for quaternary carbons.

# HRMS, <sup>1</sup>H and <sup>13</sup>C NMR Spectra

3-(p-tolylcarbamoyl)pyrazine-2-carboxylic acid (4a)

HRMS

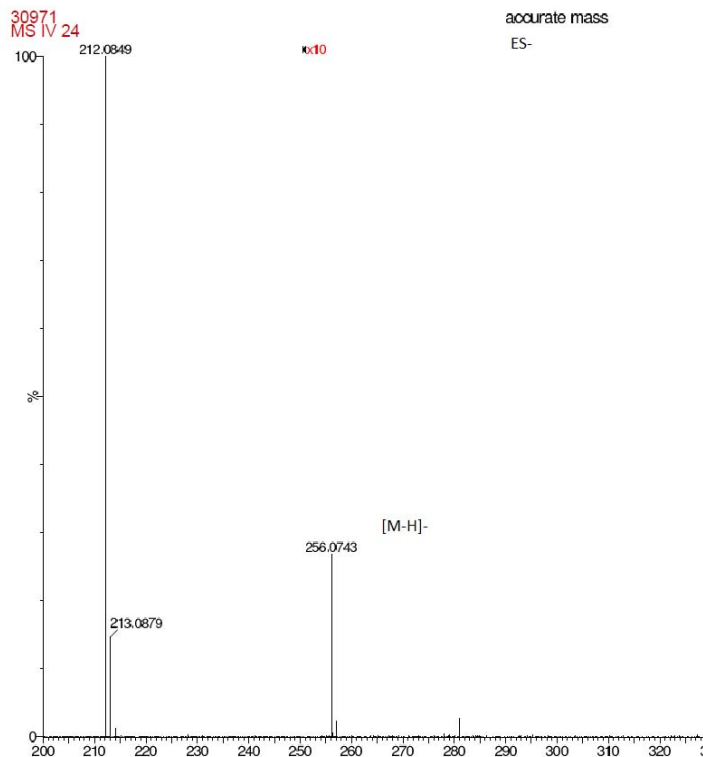

<sup>1</sup>H NMR (300 MHz, DMSO)

MS-IV-24 in DMSO  
02/11/2011

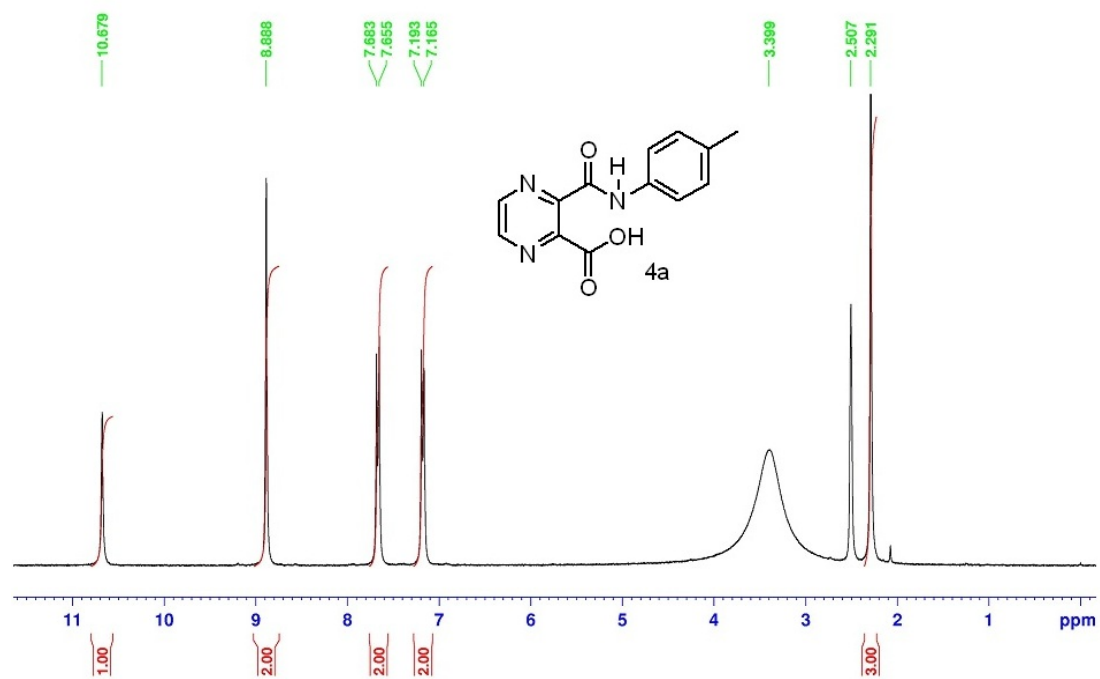

$^{13}\text{C}$  NMR (75 MHz, DMSO)

MS-IV-24 C13 in DMSO  
02/11/2011

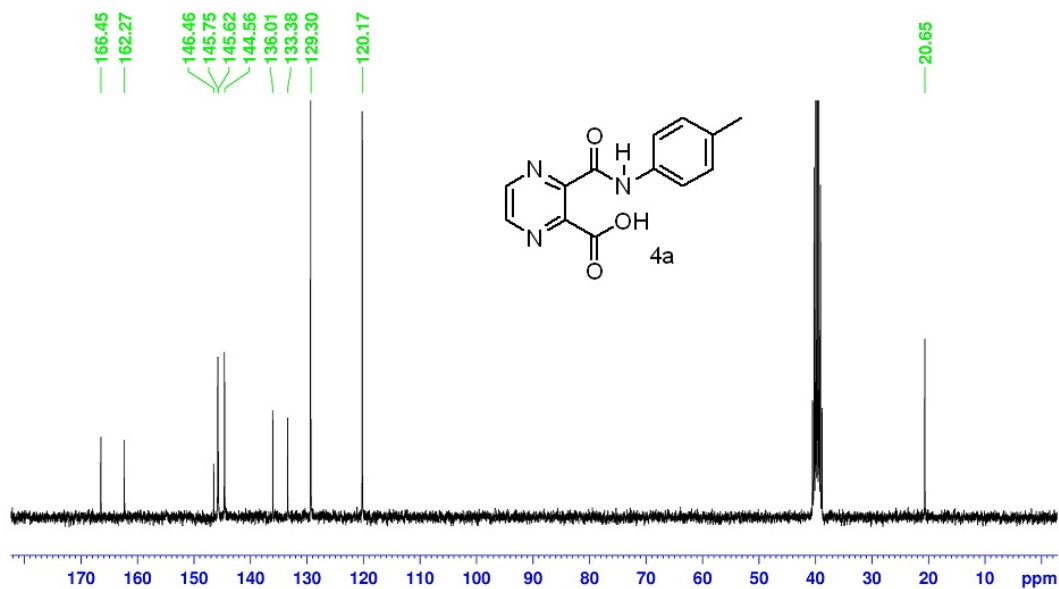

3-((4-fluorophenyl)carbamoyl)pyrazine-2-carboxylic acid (4b)

HRMS

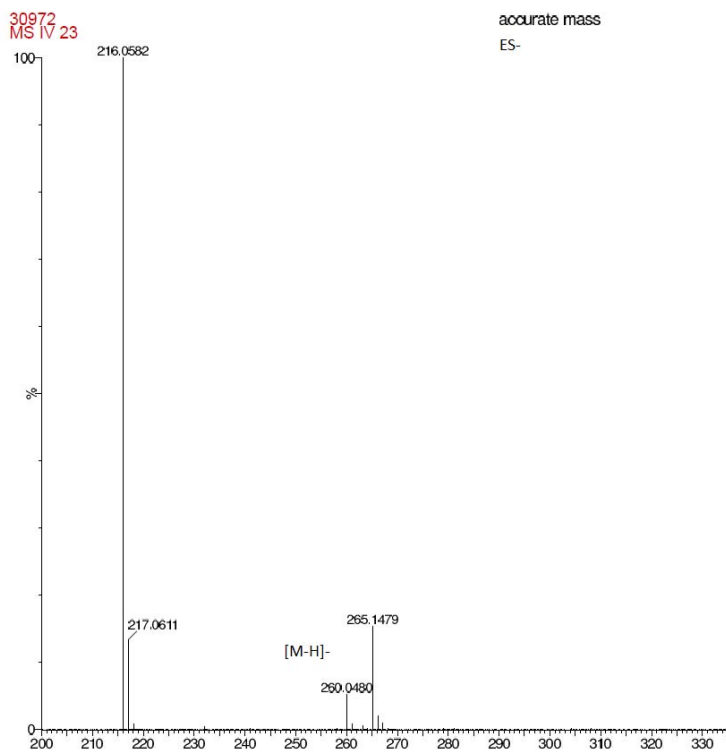



# $^1\text{H}$ NMR (300 MHz, DMSO)

MS-IV-23 in DMSO  
02/11/2011

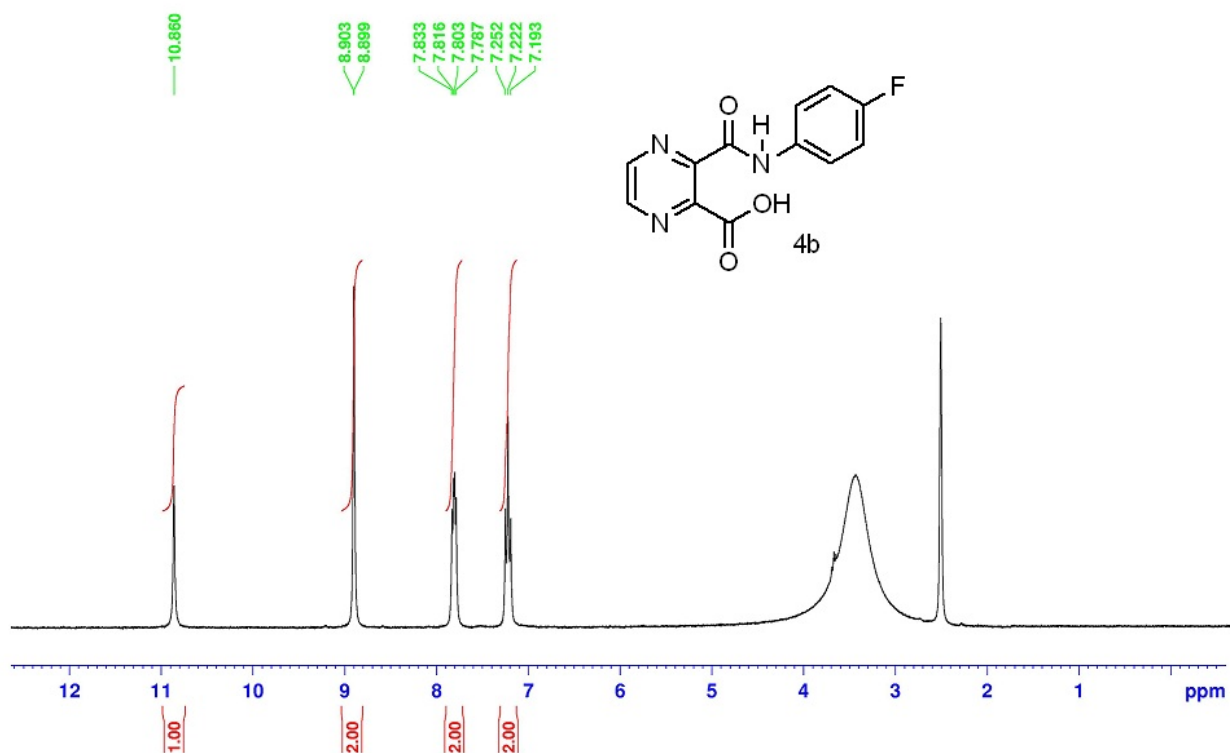

# $^{13}\text{C}$ NMR (75 MHz, DMSO)

MS IV 23

30 mg in 0.6 mL DMSO  
36,000 accumulations  
75 MHz  $^{13}\text{C}$  NMR

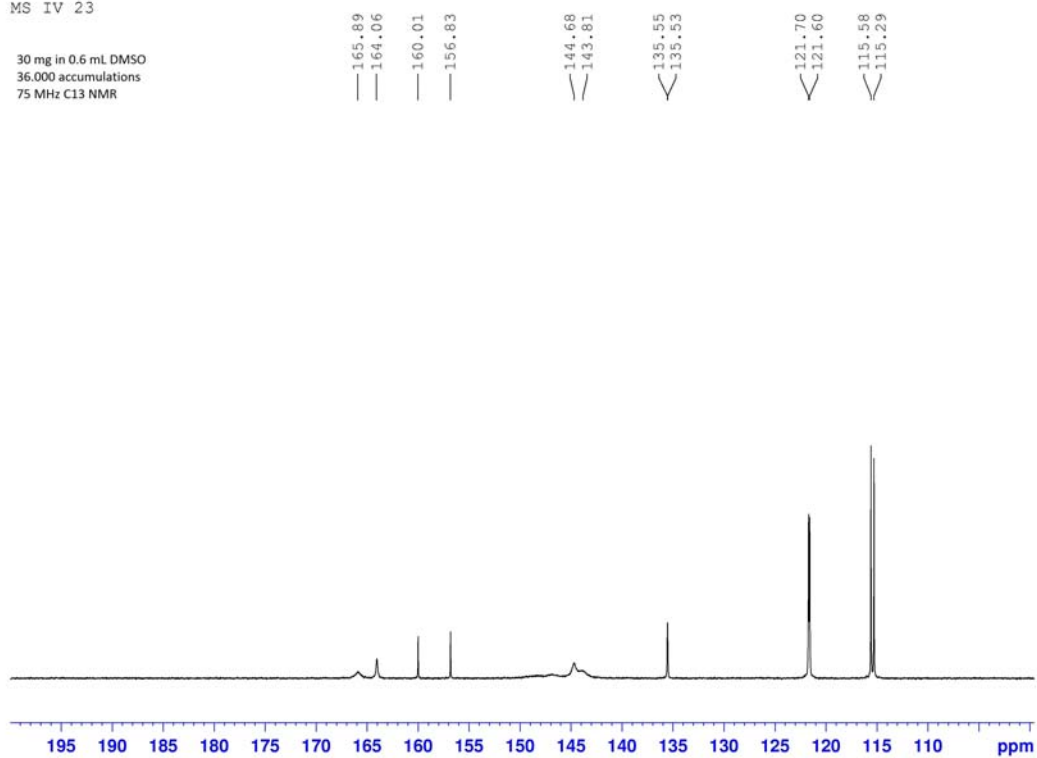

# 2-(p-tolylcarbamoyl)benzoic acid (4c)

## HRMS

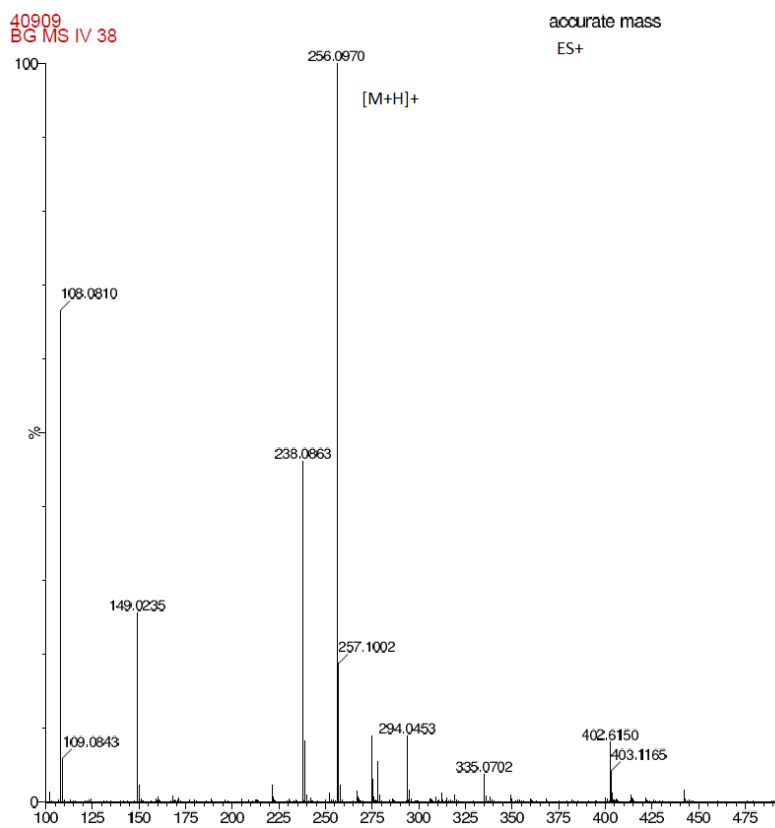

## <sup>1</sup>H NMR (300 MHz, DMSO)

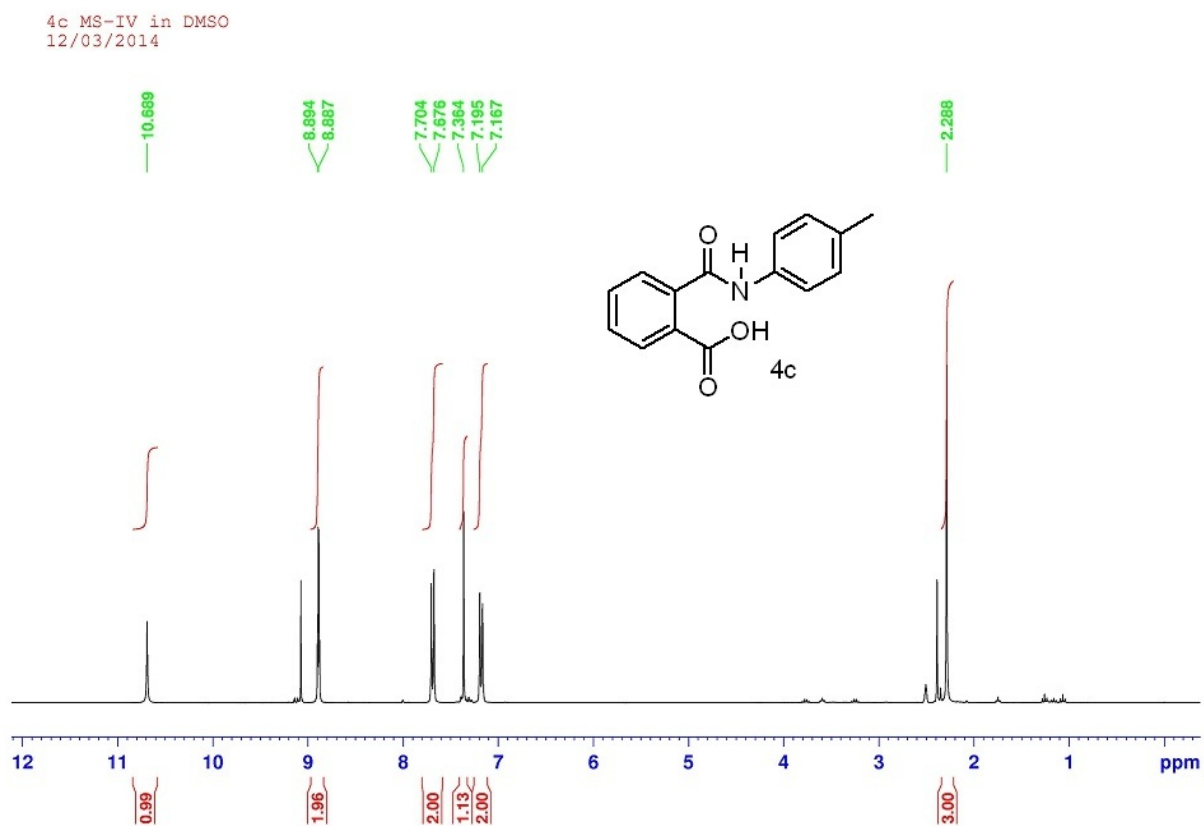

<sup>13</sup>C NMR (75 MHz, DMSO)

4c MS-IV C13 in DMSO  
12/03/2014

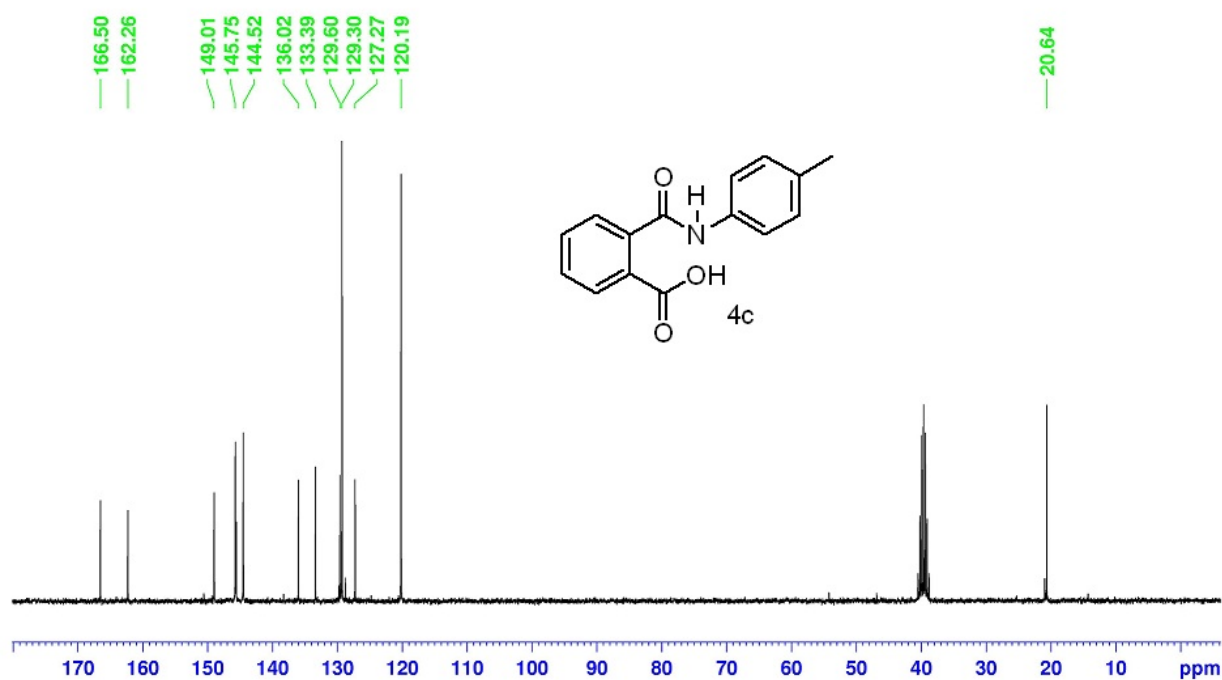

2-((4-fluorophenyl)carbamoyl)benzoic acid (4d)

HRMS

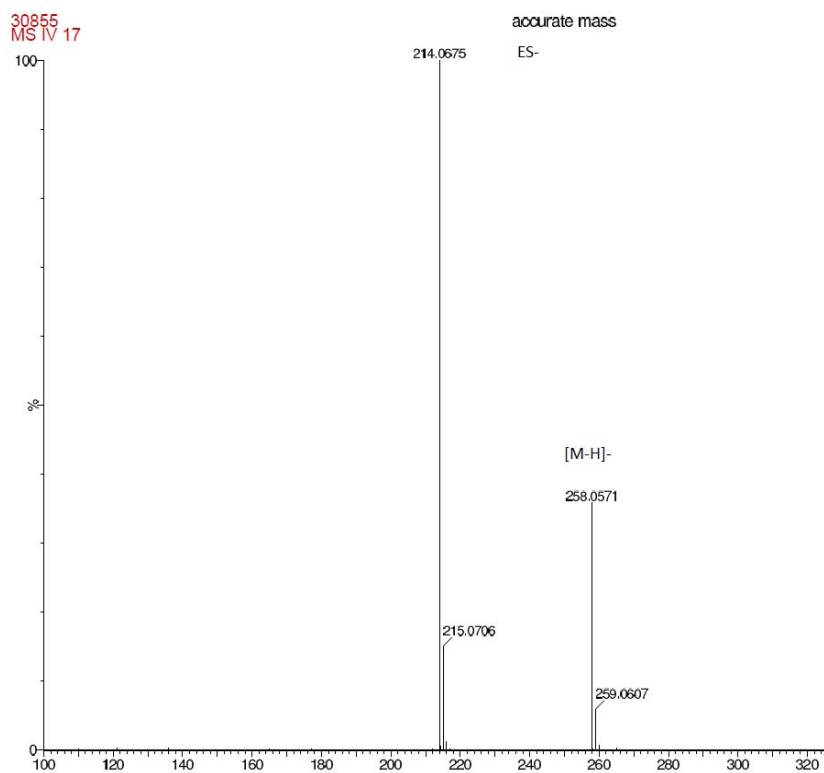

# <sup>1</sup>H NMR (300 MHz, DMSO)

MS-IV-17 in DMSO  
19/10/2011

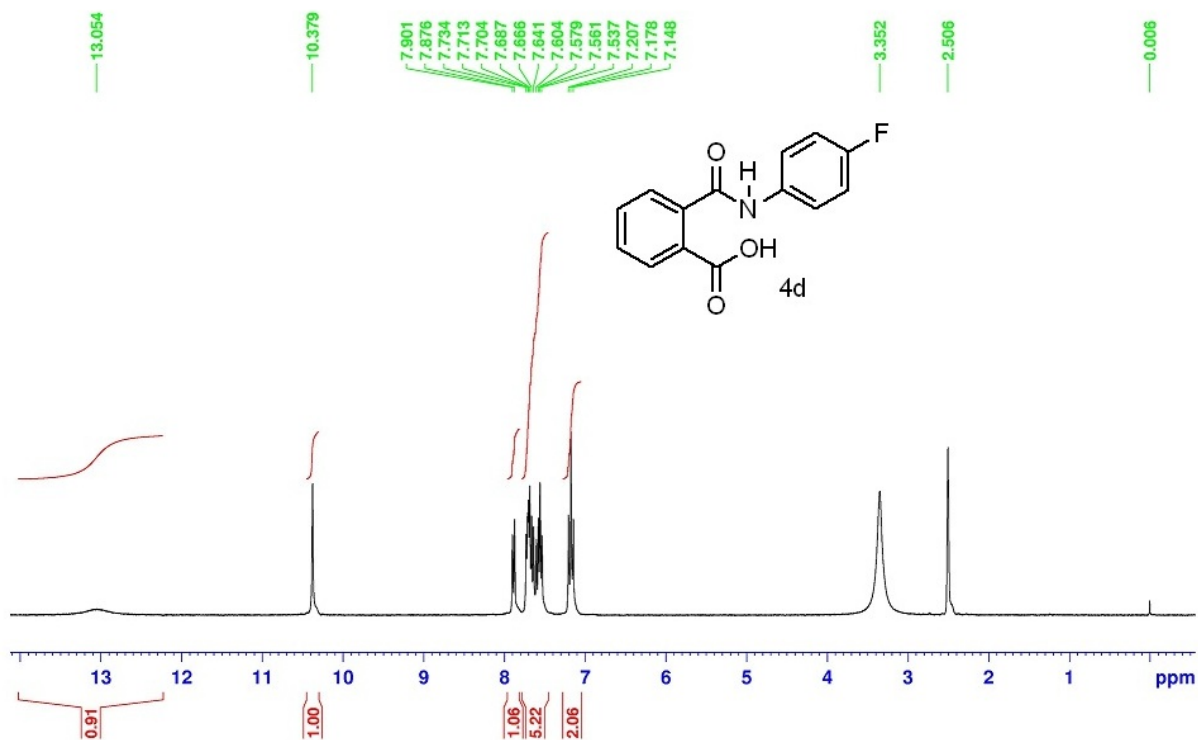

# <sup>13</sup>C NMR (75 MHz, DMSO)

MS-IV-17 C13 in DMSO  
19/10/2011

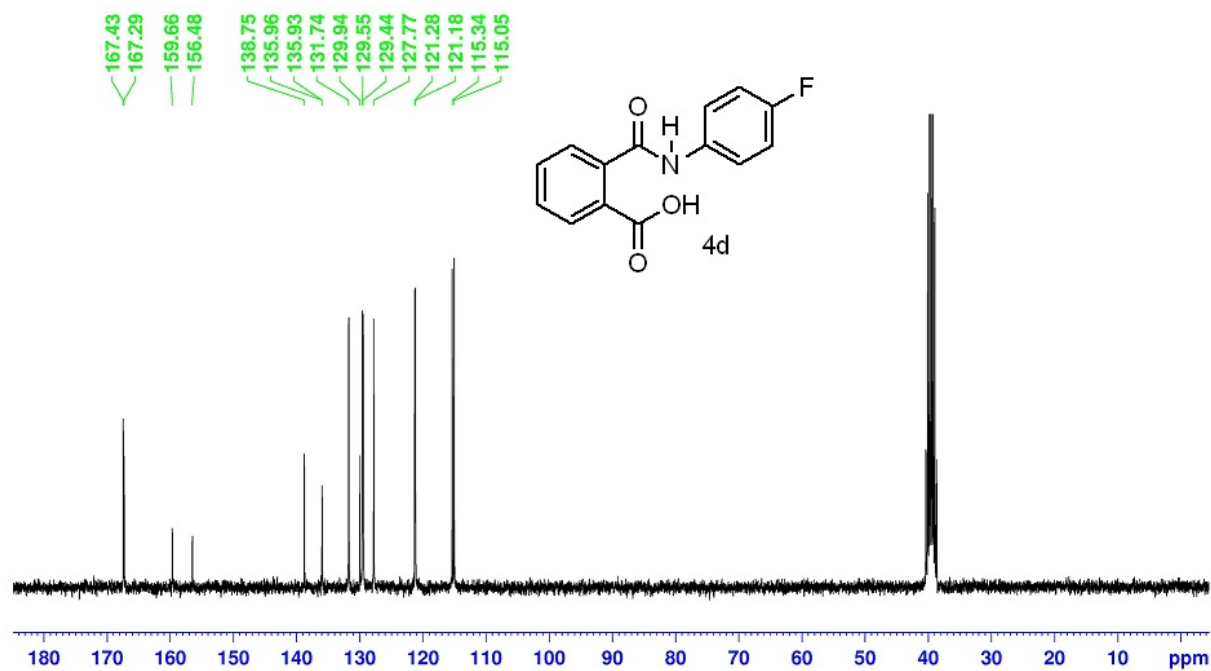

(Z)-7-(p-tolylimino)furo[3,4-b]pyrazin-5(7H)-one(5a)  
HRMS

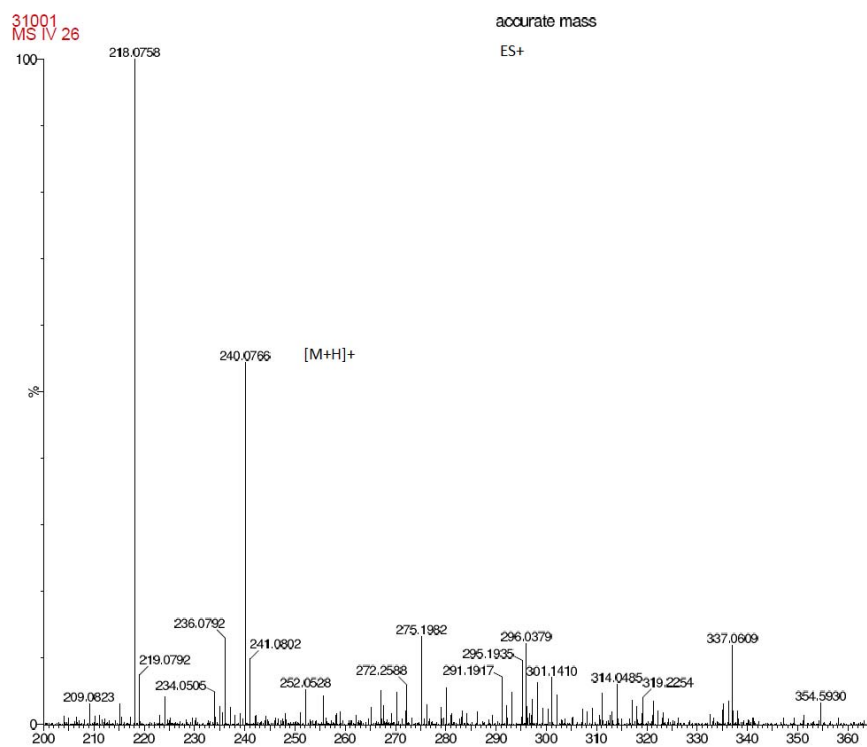

<sup>1</sup>H NMR (300 MHz, CDCl<sub>3</sub>)

MS-IV-26 in CDCl<sub>3</sub>  
03/11/2011

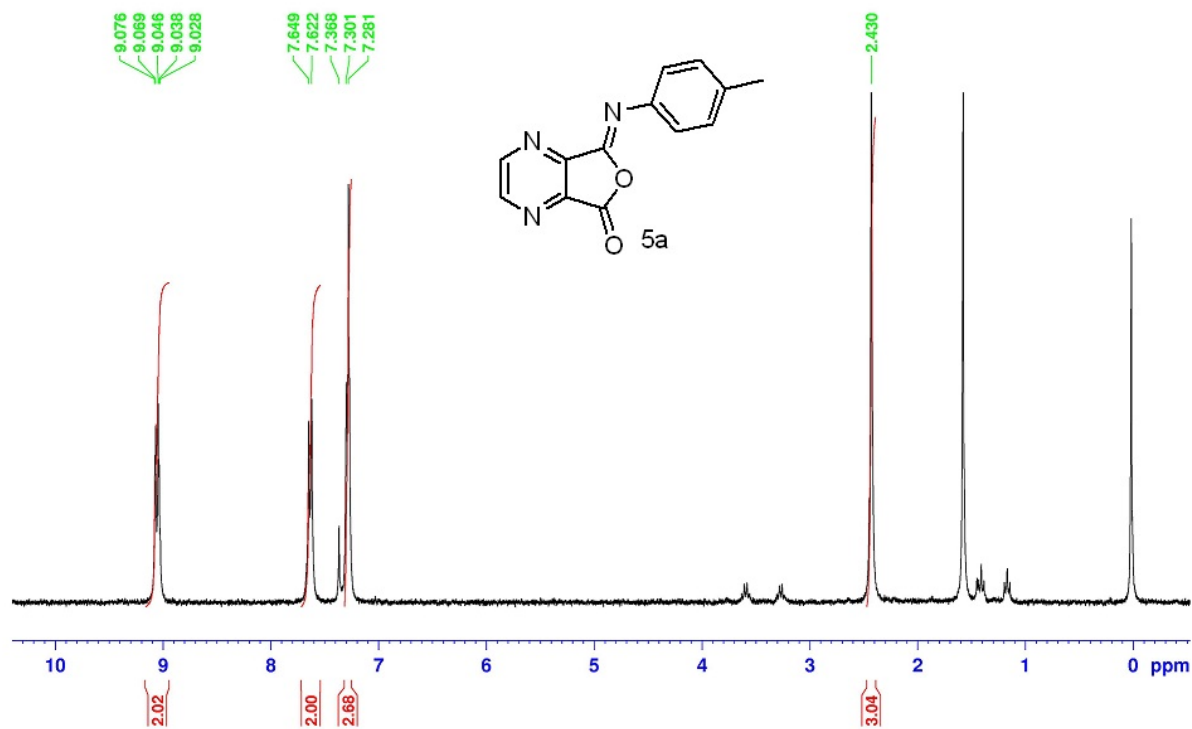

$^{13}\text{C}$  NMR (75 MHz,  $\text{CDCl}_3$ )

MS-IV-26 C13 in  $\text{CDCl}_3$   
03/11/2011

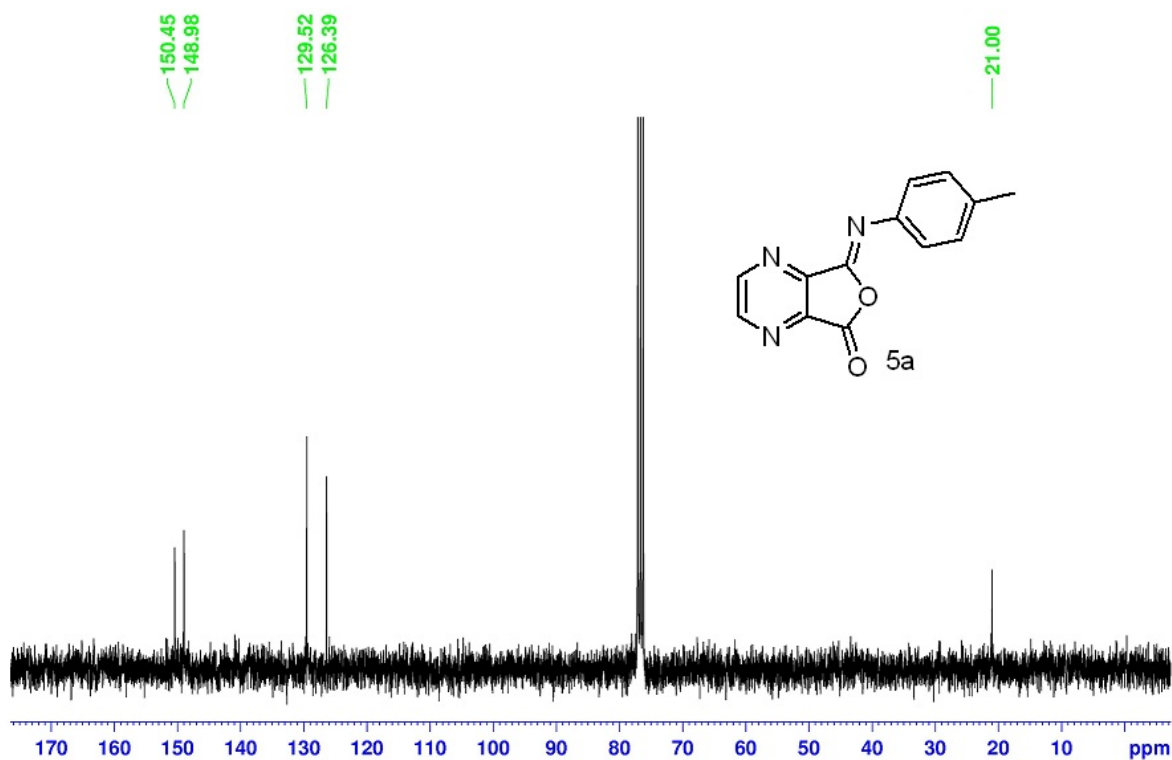

(Z)-7-((4-fluorophenyl)imino)furo[3,4-b]pyrazin-5(7H)-one (5b)

HRMS

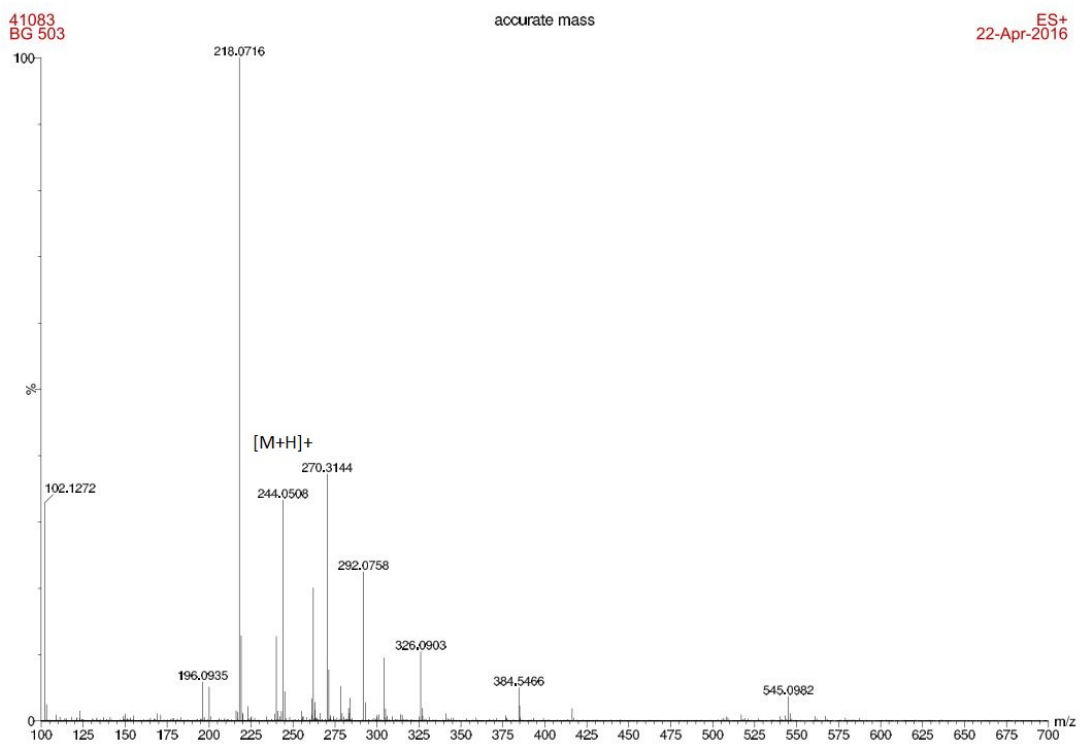

$^1\text{H}$  NMR (300 MHz,  $\text{CDCl}_3$ )

MS-IV-25 in  $\text{CDCl}_3$   
25/01/2014

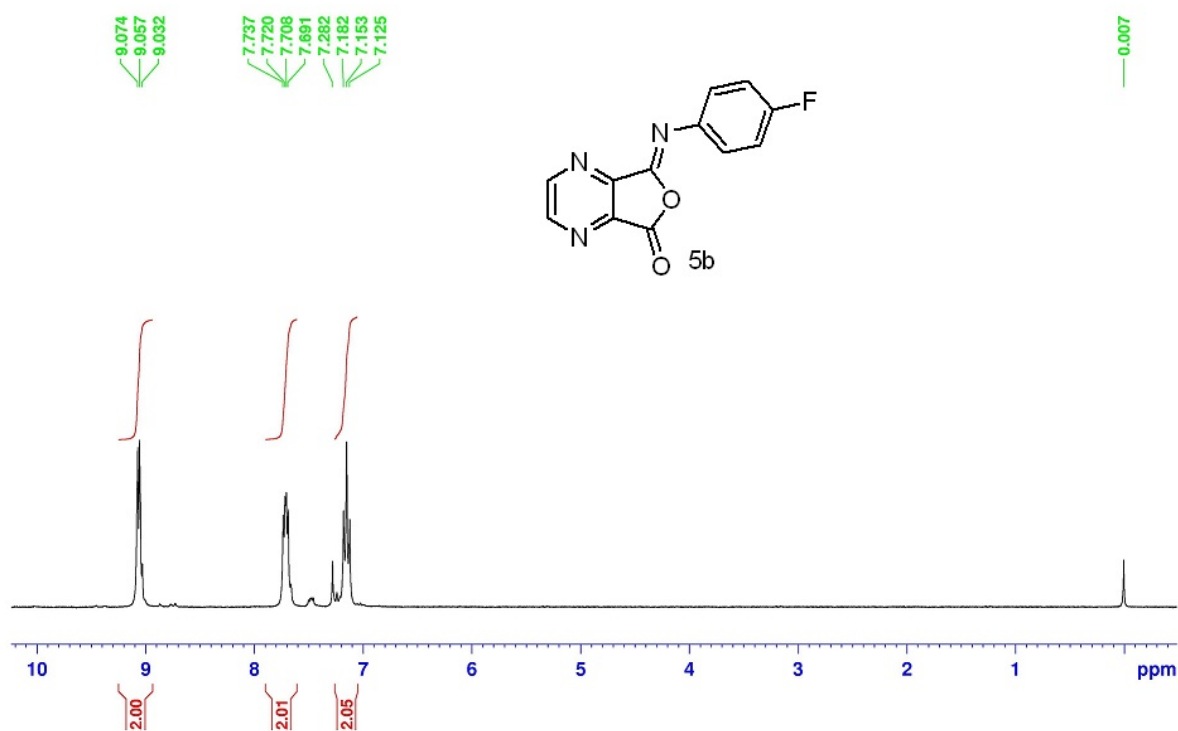

$^{13}\text{C}$  NMR (75 MHz,  $\text{CDCl}_3$ )

MS-IV-25 C13 in  $\text{CDCl}_3$  300 mhz  
25/01/2014

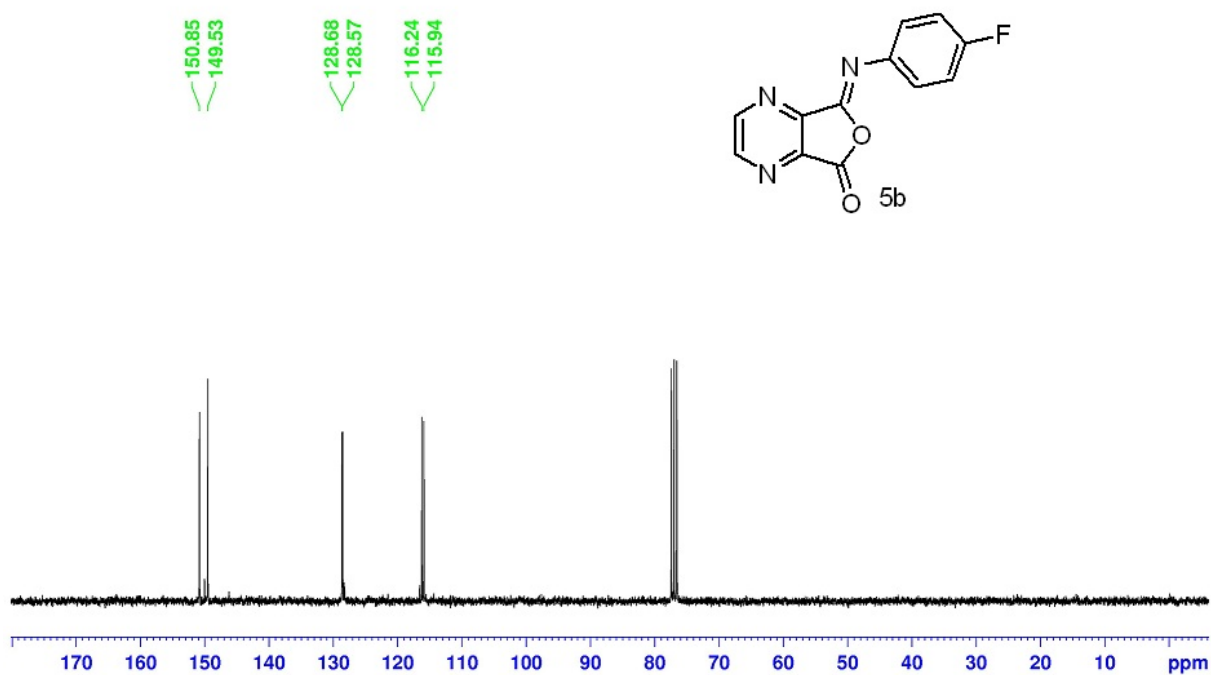

(Z)-3-(p-tolylimino)isobenzofuran-1(3H)-one (5c)  
HRMS

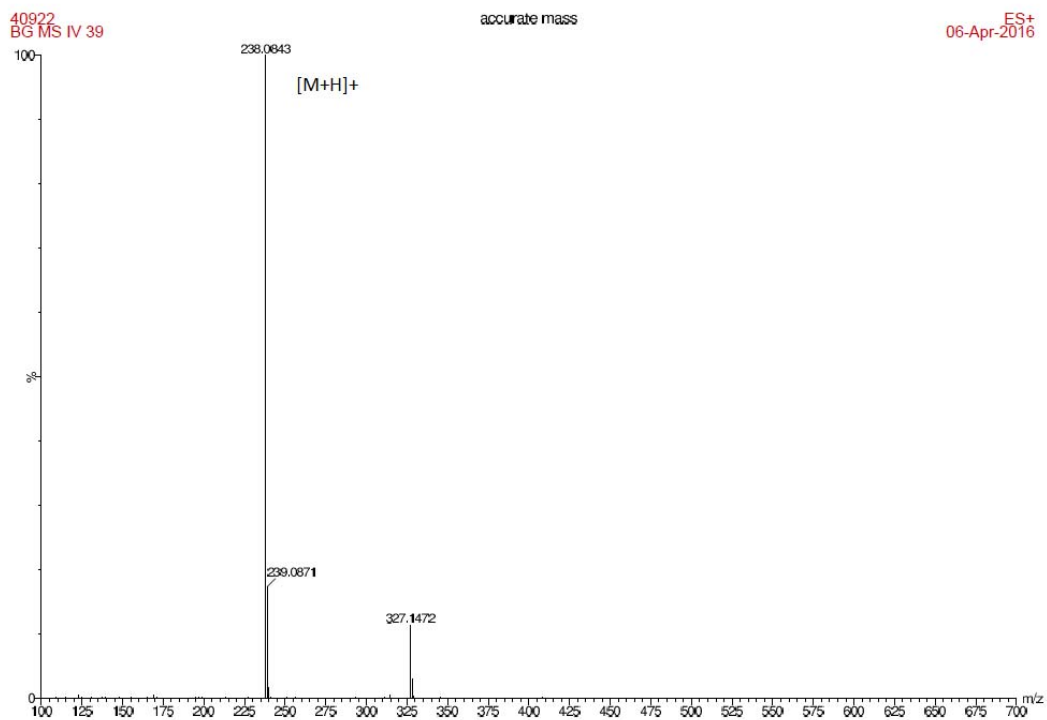

<sup>1</sup>H NMR (300 MHz, CDCl<sub>3</sub>)

MS-IV-39 in CDCl<sub>3</sub>  
28/03/2012

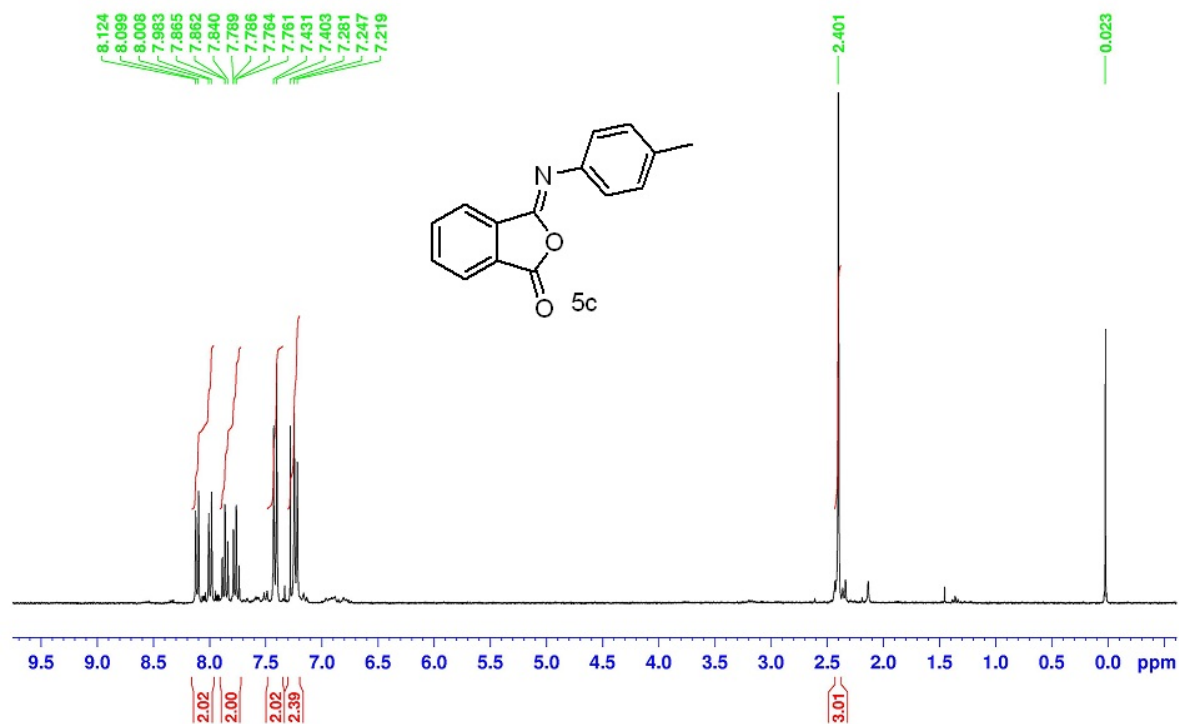



$^{13}\text{C}$  NMR (75 MHz, DMSO)

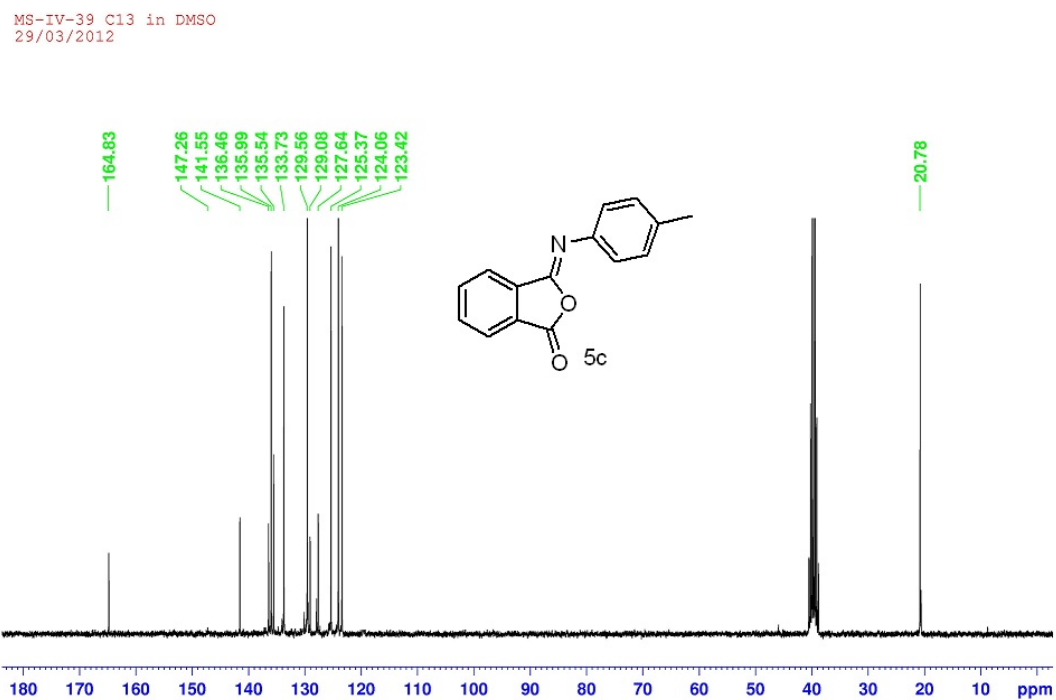

(Z)-3-((4-fluorophenyl)imino)isobenzofuran-1(3H)-one (5d)

HRMS

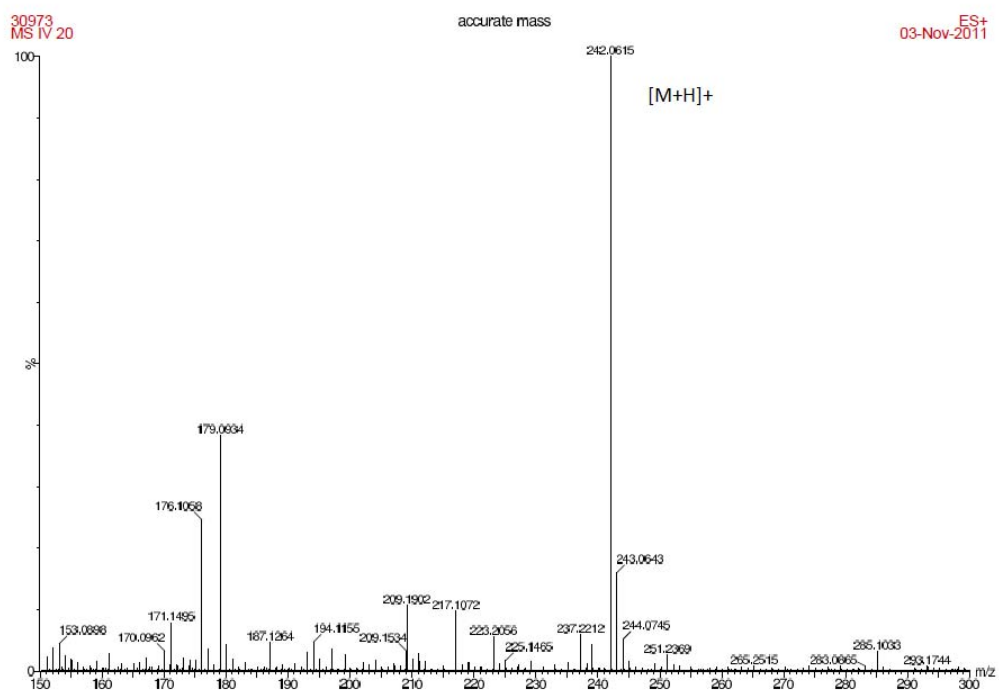

# $^1\text{H}$ NMR (300 MHz, DMSO)

MS-IV-20 in DMSO  
31/10/2011

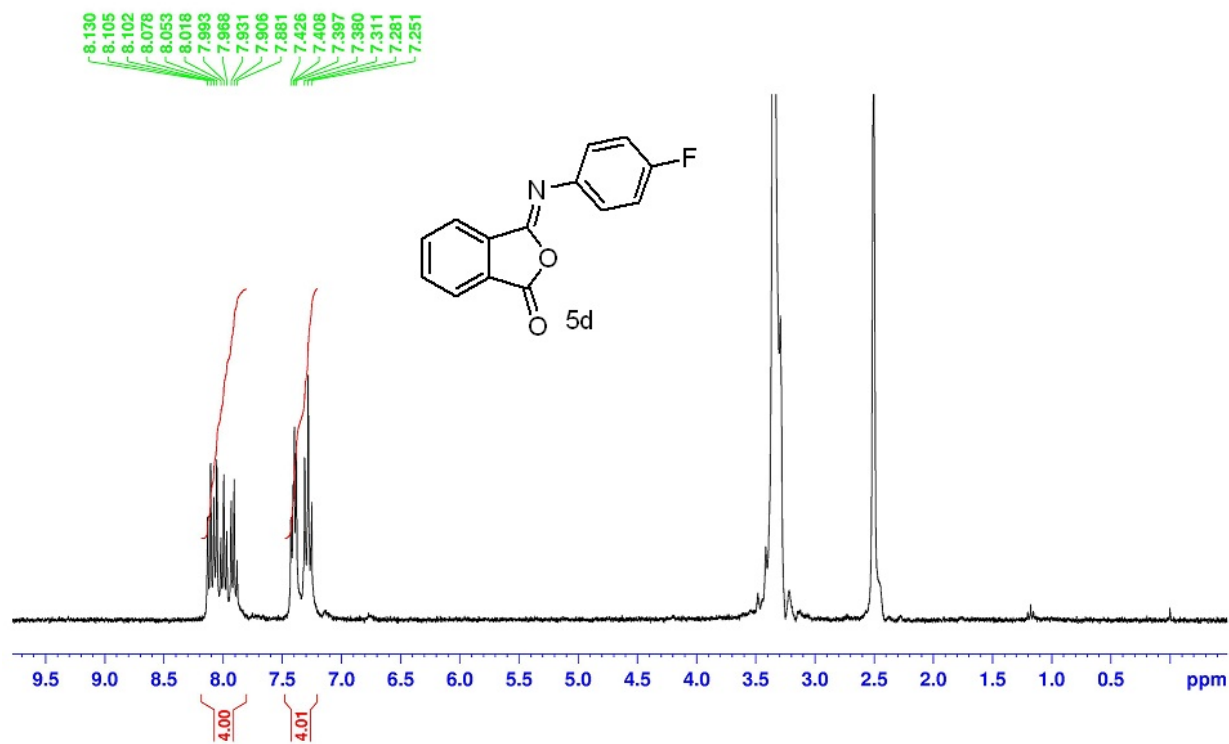

# $^{13}\text{C}$ NMR (75 MHz, DMSO)

MS-IV-20 C13 in DMSO  
31/10/2011

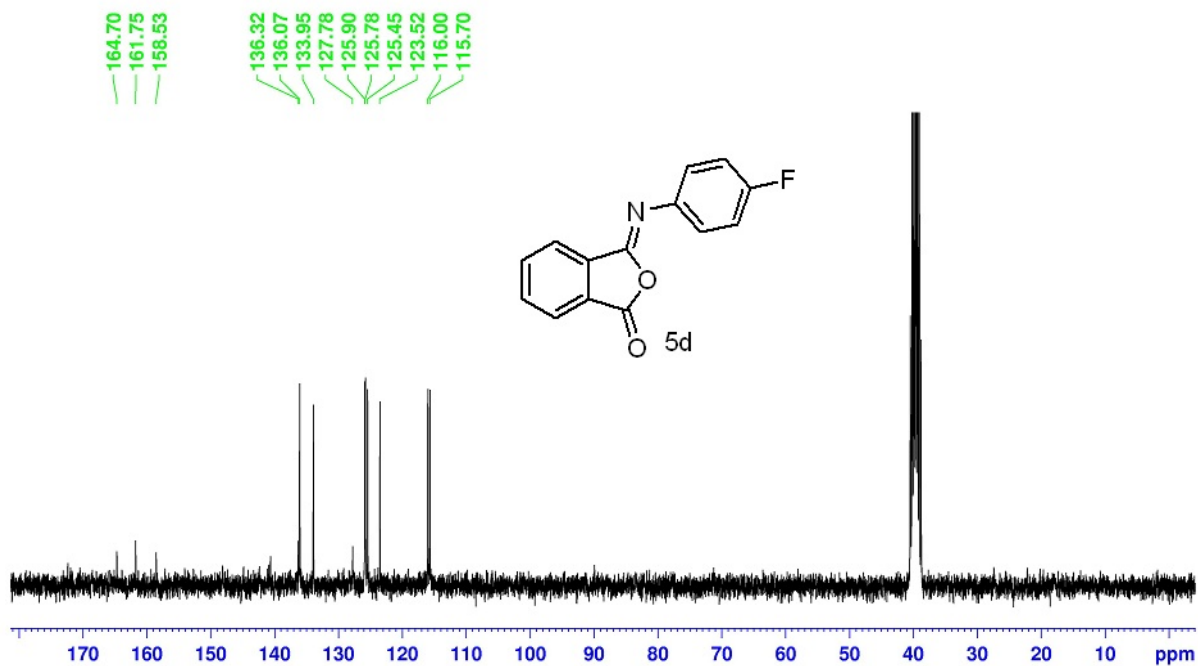

*N*<sup>2</sup>-(4-fluorophenyl)-*N*<sup>3</sup>-(4-methyl-2-(3-methyl-1H-pyrazol-5-yl)phenyl)pyrazine-2,3-dicarboxamide (6a):

HRMS

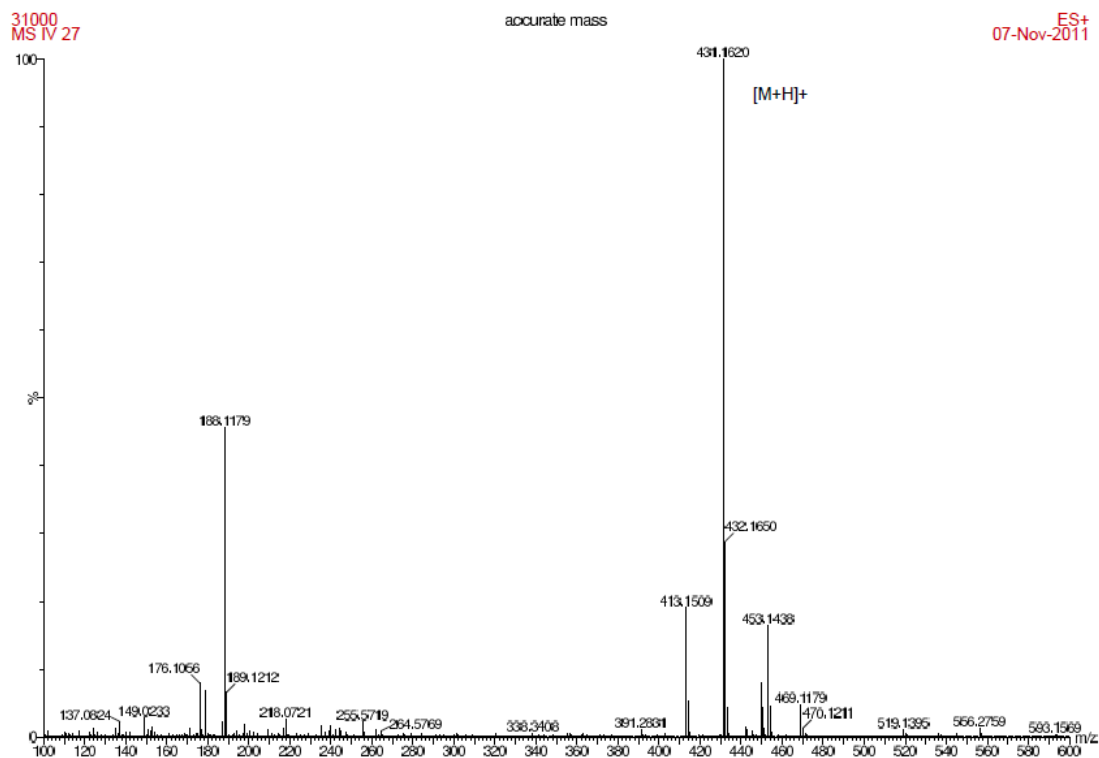

<sup>1</sup>H NMR (300 MHz, DMSO)

MS-IV-27 in DMSO  
04/11/2011

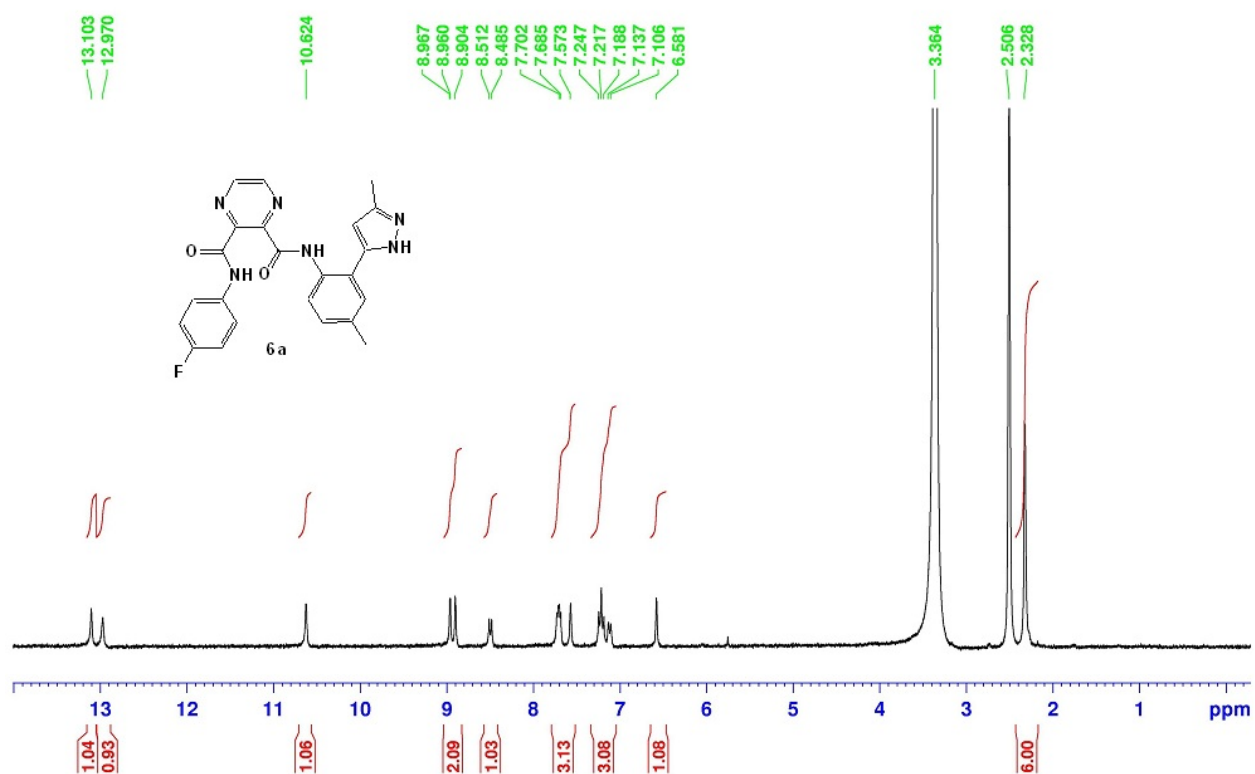

# $^{13}\text{C}$ NMR (150 MHz, $\text{CDCl}_3$ )

MS-IV-27-600 in  $\text{CDCl}_3$   
13C  
1H decoupled

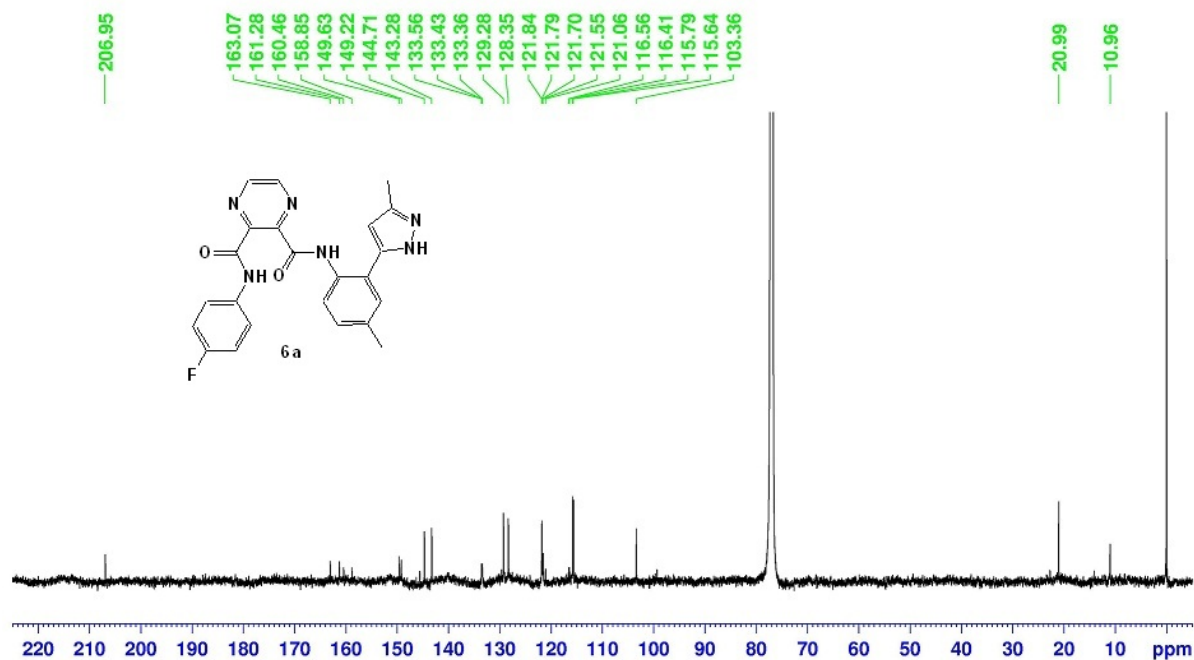

$N^2$ -(4-methyl-2-(3-methyl-1H-pyrazol-5-yl)phenyl)- $N^3$ -(p-tolyl)pyrazine-2,3-dicarboxamide (6b):

HRMS

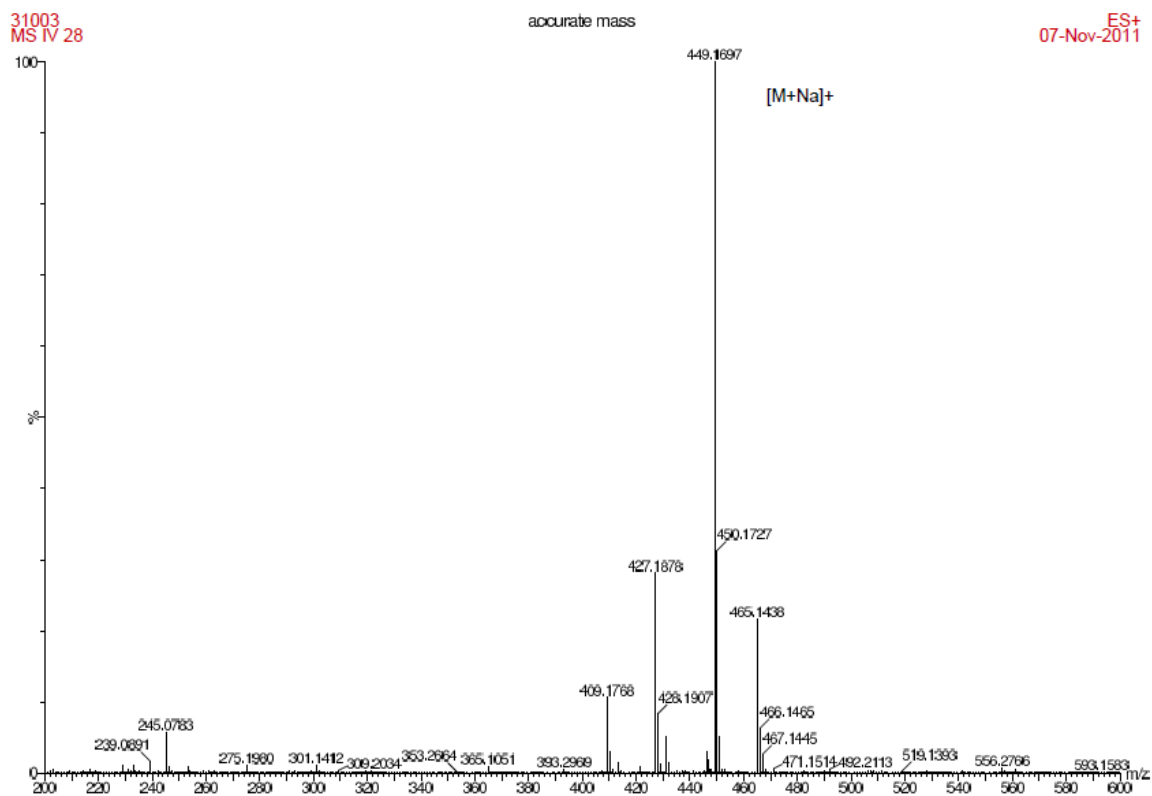

# <sup>1</sup>H NMR (600 MHz, CDCl<sub>3</sub>)

MS-IV-28-600 in CDCl<sub>3</sub>  
proton spectrum  
non-spinning  
temp=25C

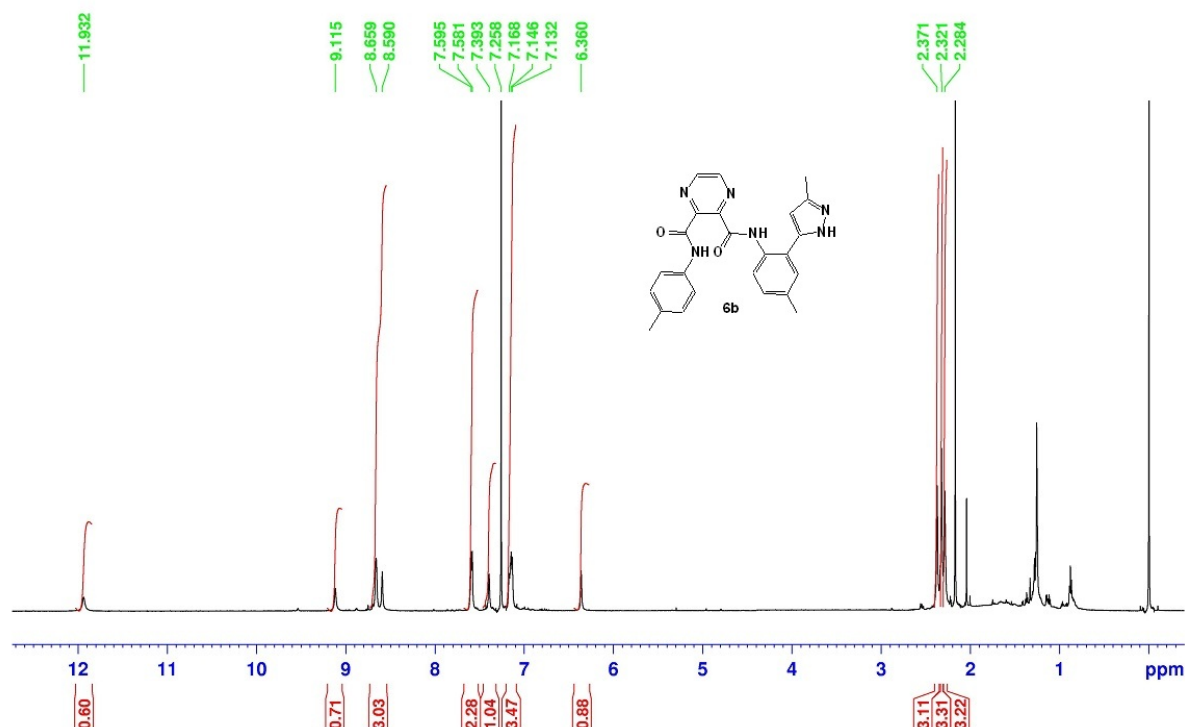

# <sup>13</sup>C NMR (150 MHz, CDCl<sub>3</sub>)

MS-IV-28-600 in CDCl<sub>3</sub>  
13C  
1H decoupled

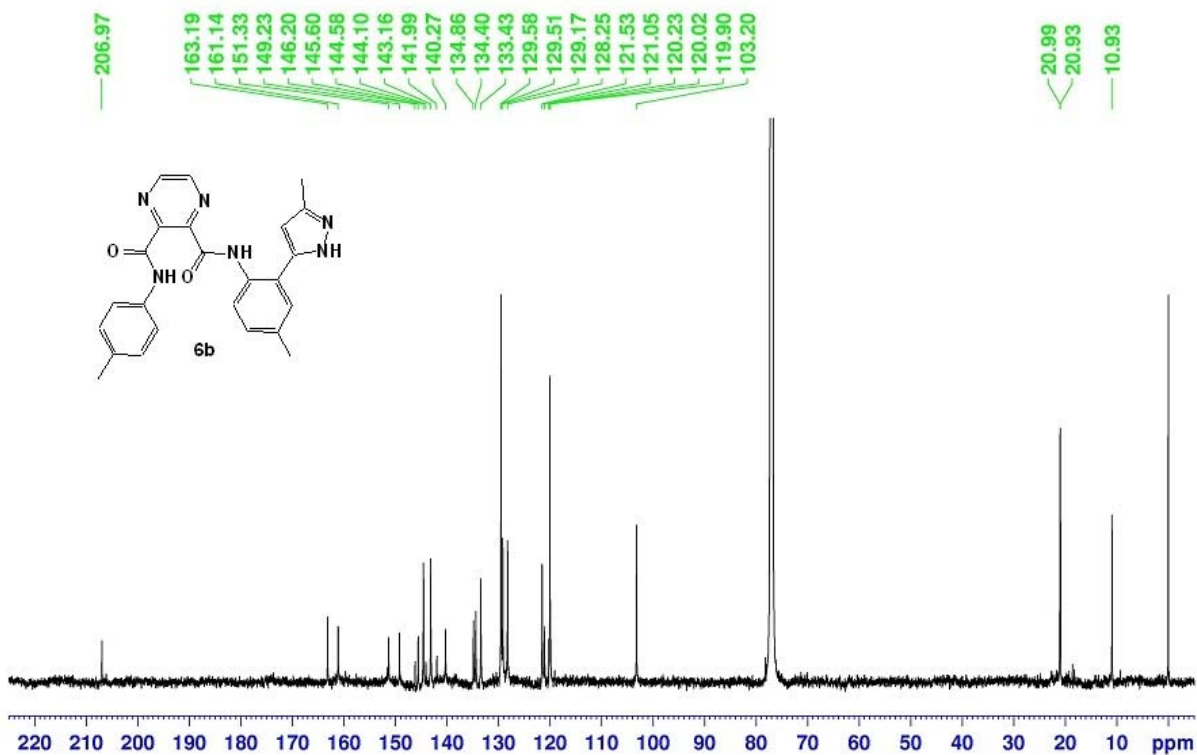

*N*<sup>2</sup>-(4-fluorophenyl)-*N*<sup>3</sup>-(4-methyl-2-(thiophen-2-yl)phenyl)pyrazine-2,3-dicarboxamide (6c)  
HRMS

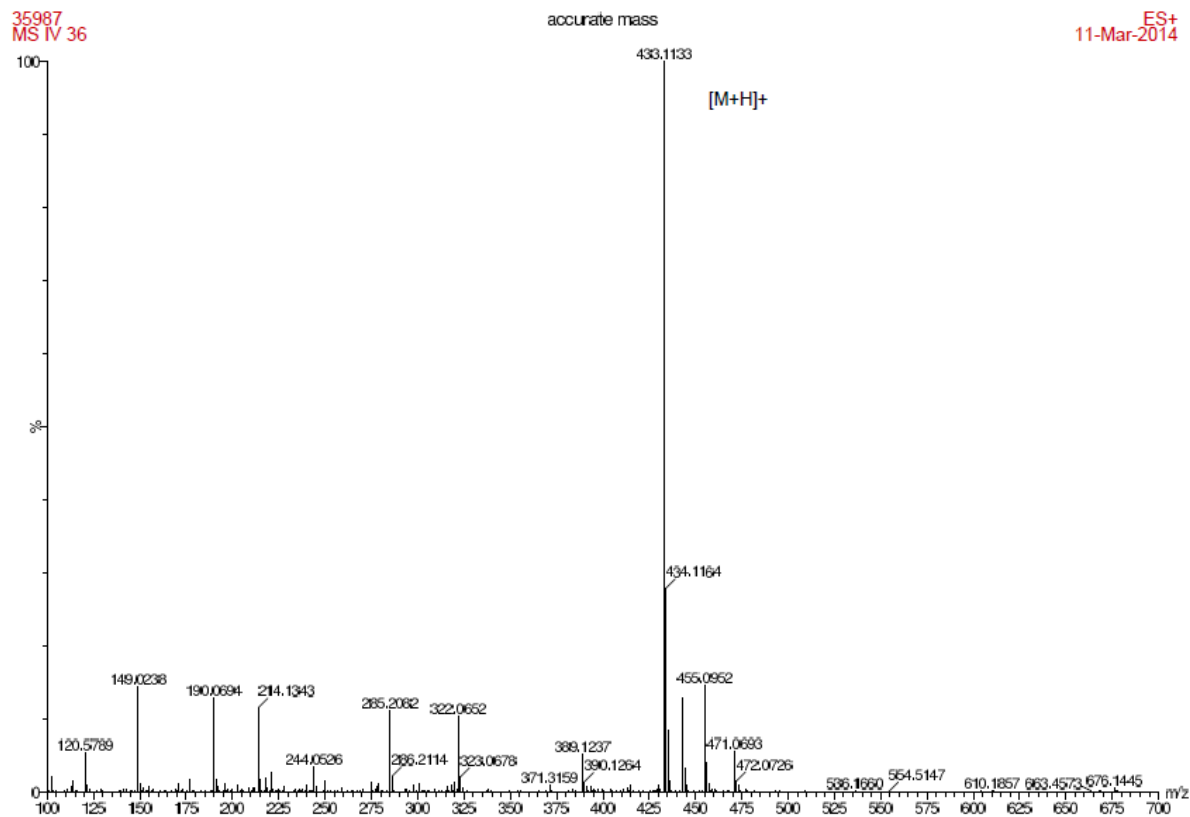

<sup>1</sup>H NMR (600 MHz, CDCl<sub>3</sub>)

MS-IV-36-600 in CDCl<sub>3</sub>  
proton spectrum

temp=25C

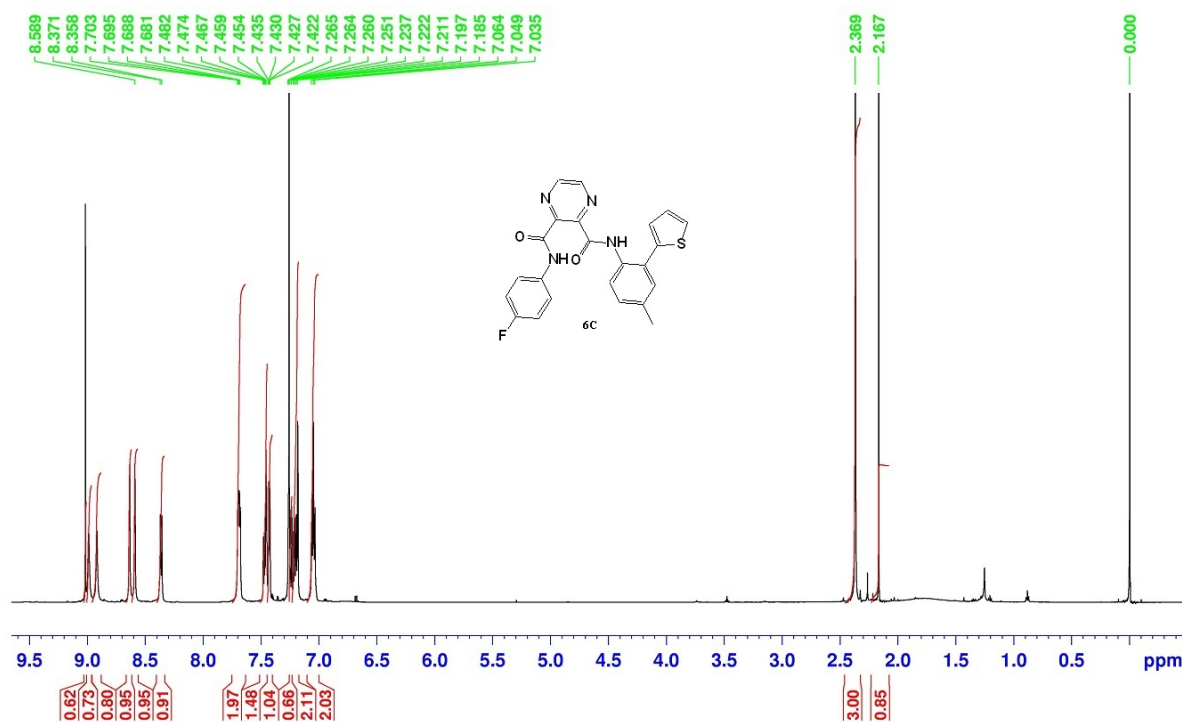

$^{13}\text{C}$  NMR (150 MHz,  $\text{CDCl}_3$ )

MS-IV-36-600 in  $\text{CDCl}_3$   
13C

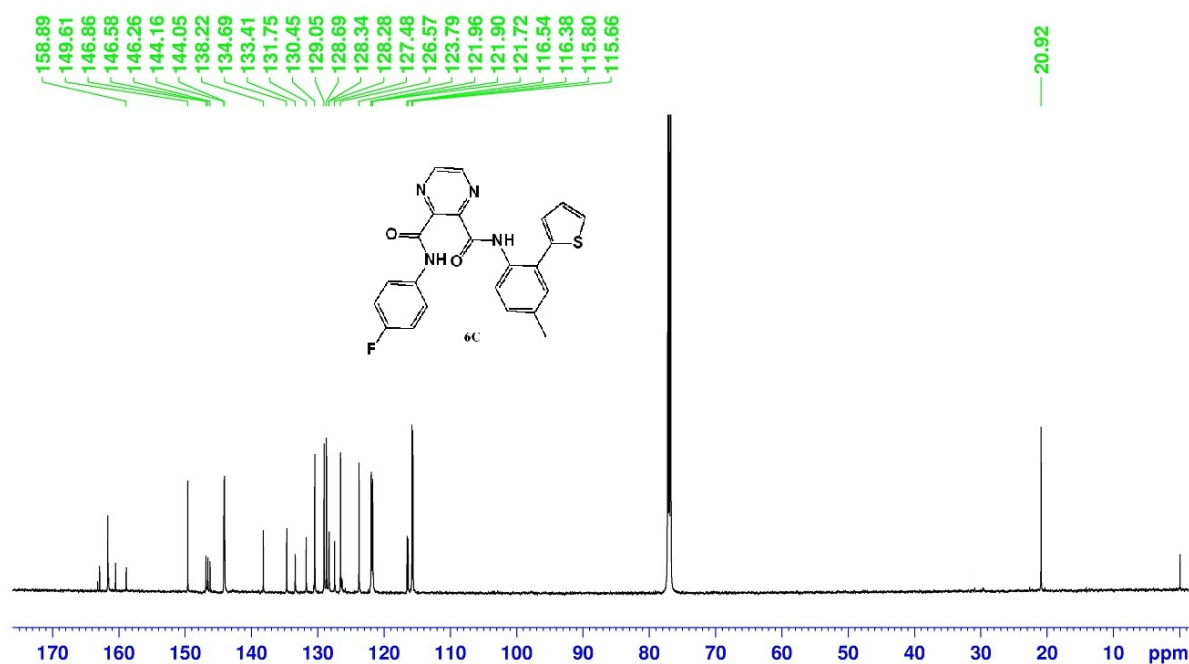

$N^2$ -(4-methyl-2-(thiophen-2-yl)phenyl)- $N^3$ -(p-tolyl)pyrazine-2,3-dicarboxamide (6d)

HRMS

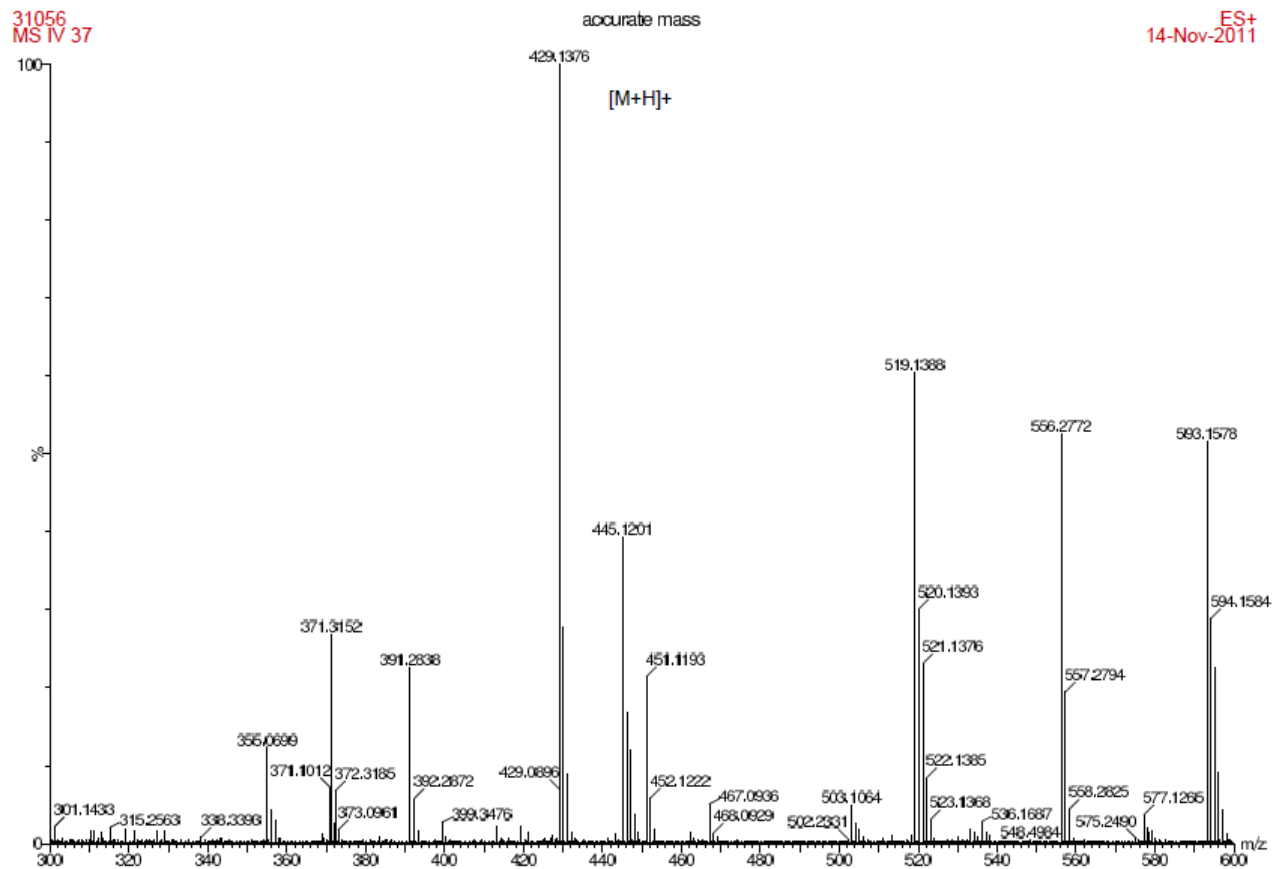

# <sup>1</sup>H NMR (600 MHz, CDCl<sub>3</sub>)

MS-IV-37-600 in CDCl<sub>3</sub>  
proton spectrum

temp=25C

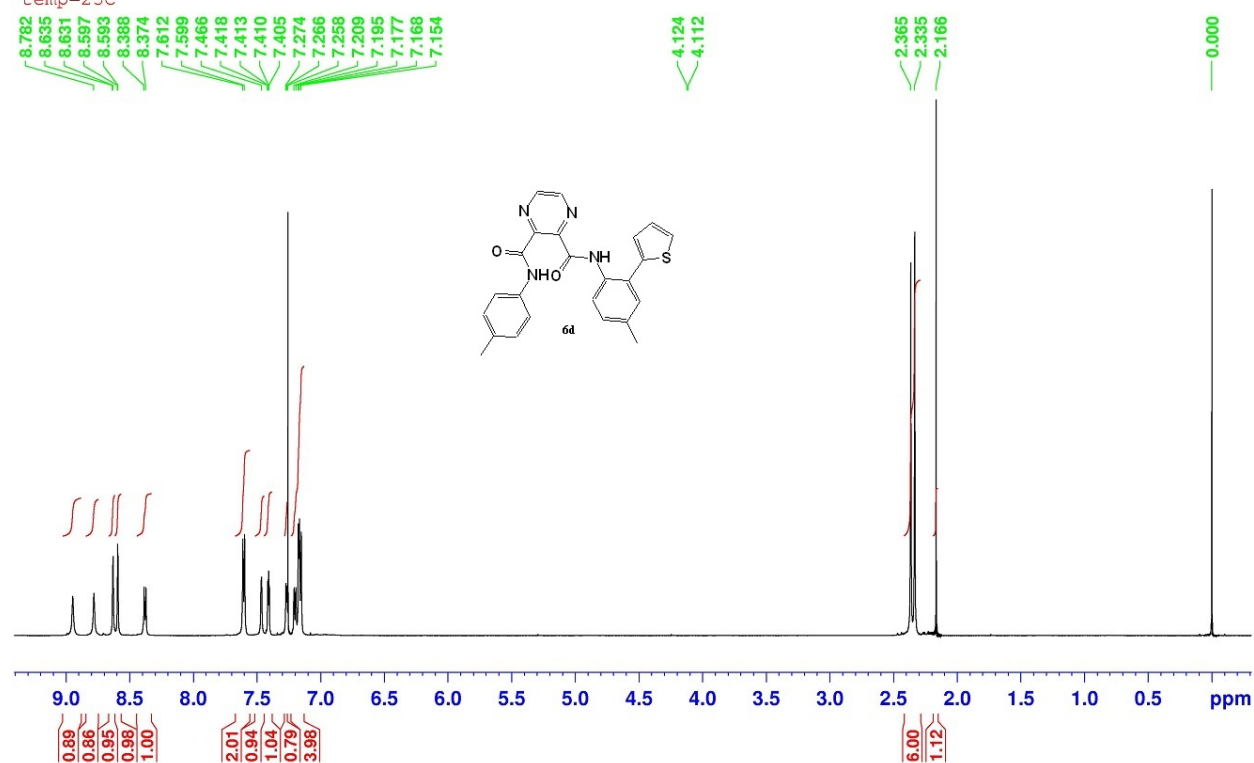

# <sup>13</sup>C NMR (150 MHz, CDCl<sub>3</sub>)

MS-IV-37-600 in CDCl<sub>3</sub>  
<sup>13</sup>C

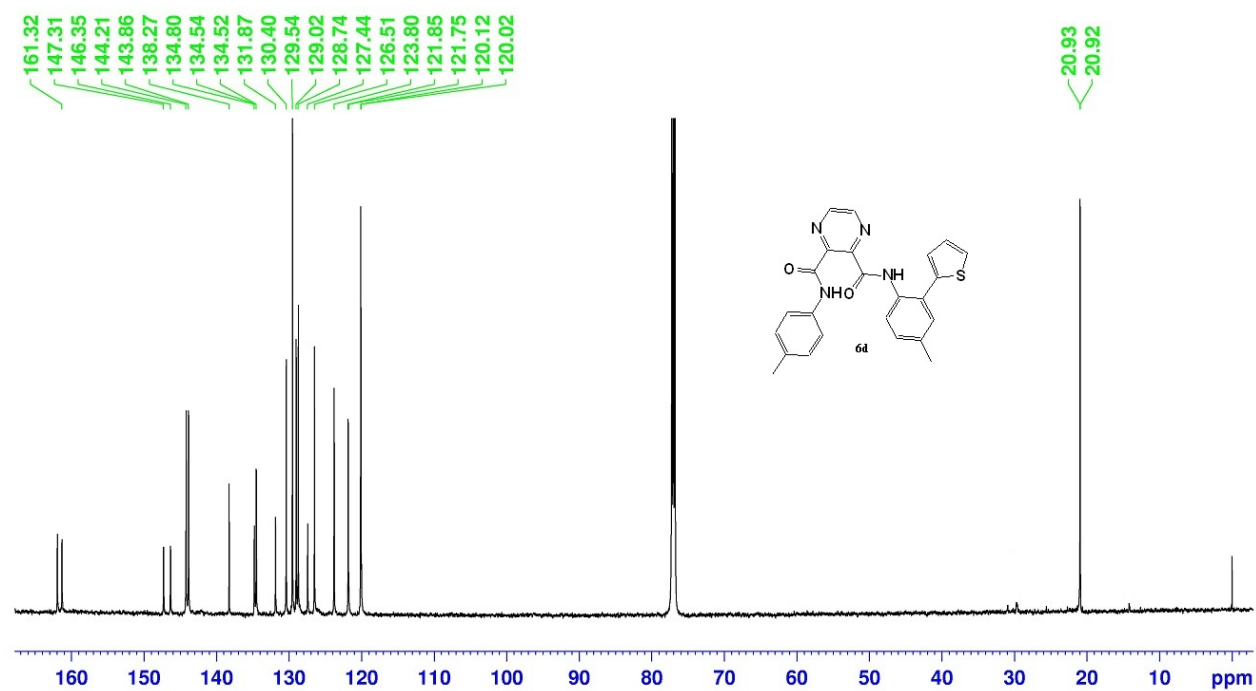



*N*<sup>2</sup>-(4-fluorophenyl)-*N*<sup>3</sup>-(4-methyl-2-(5-methylthiophen-2-yl)phenyl)pyrazine-2,3-dicarboxamide (6e)

HRMS

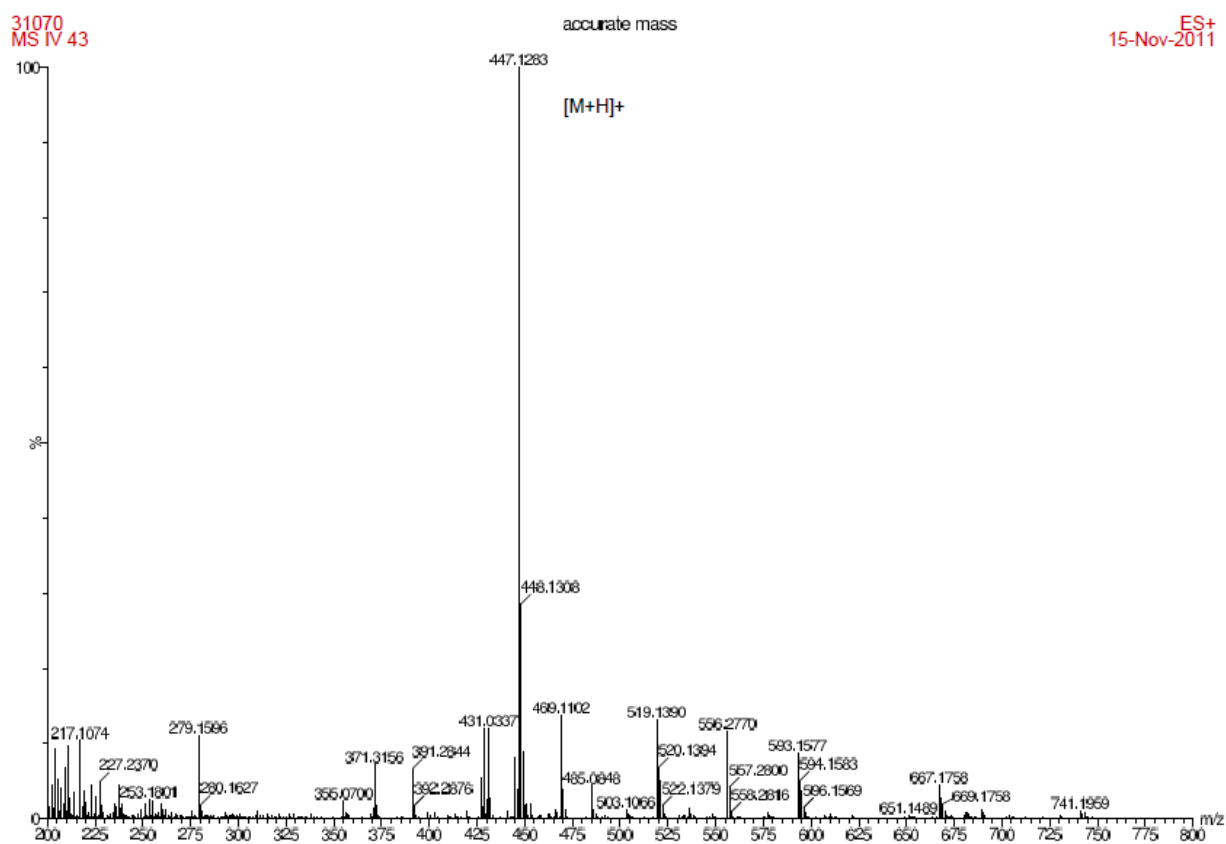

<sup>1</sup>H NMR (600 MHz, CDCl<sub>3</sub>)

MS-IV-43-600 in CDCl<sub>3</sub>  
proton spectrum

temp=25C

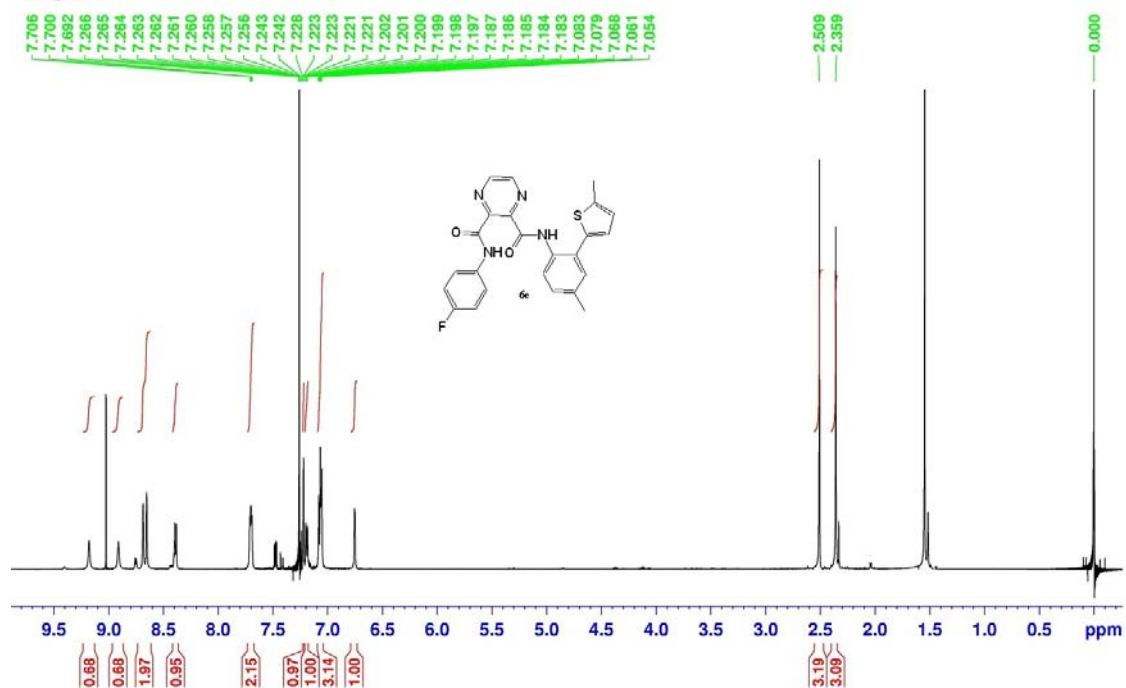

$^{13}\text{C}$  NMR (150 MHz,  $\text{CDCl}_3$ )

MS-IV-43-600 in  $\text{CDCl}_3$   
 $^{13}\text{C}$

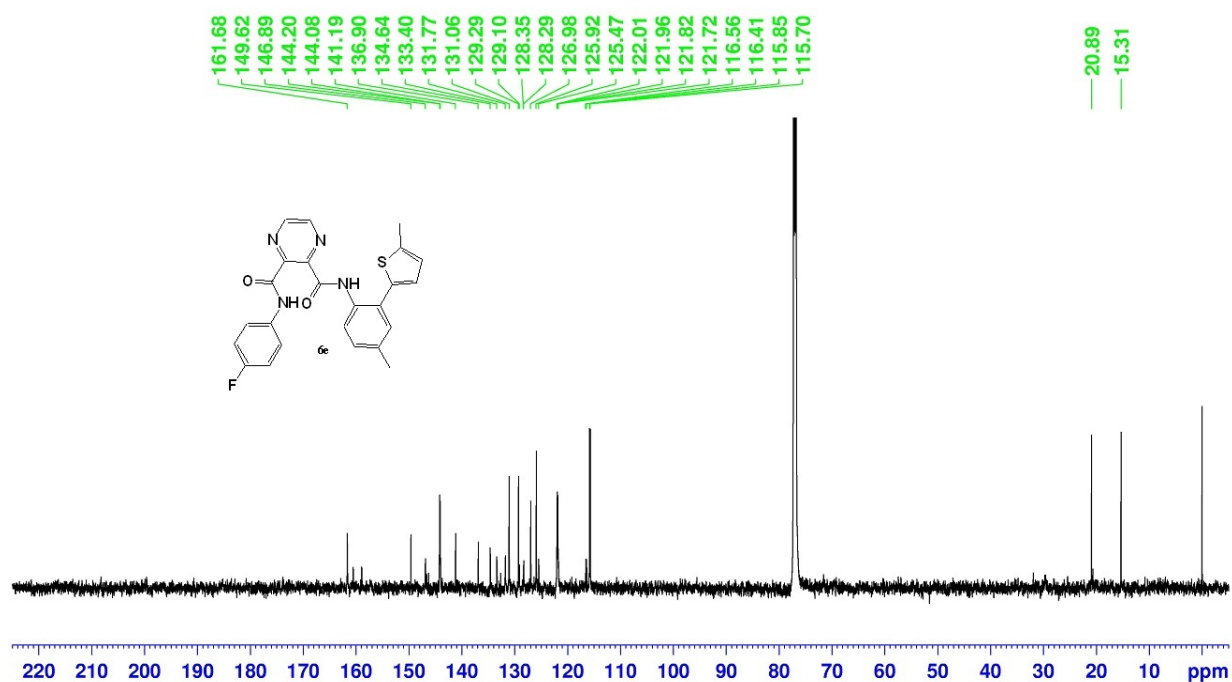

$N^2$ -(4-methyl-2-(5-methylthiophen-2-yl)phenyl)- $N^3$ -(p-tolyl)pyrazine-2,3-dicarboxamide (6f)  
HRMS

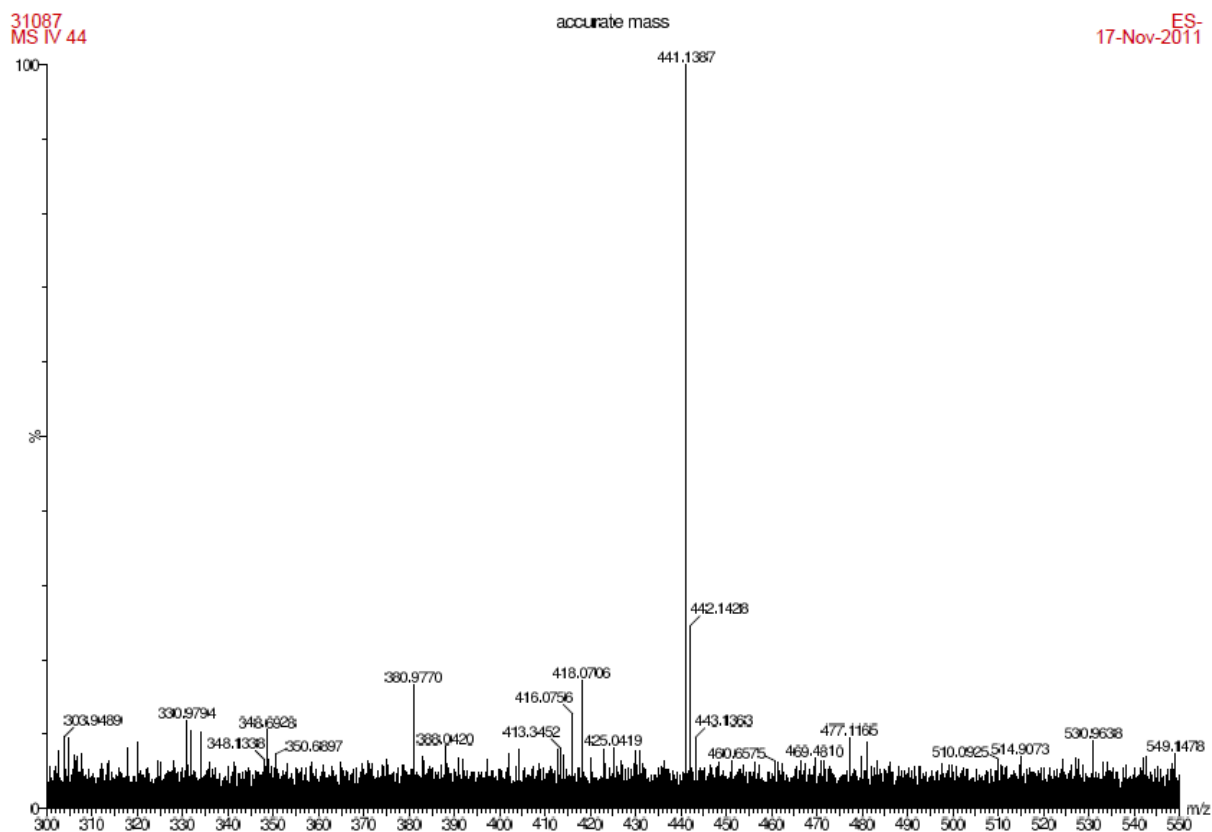

# $^1\text{H}$ NMR (600 MHz, $\text{CDCl}_3$ )

MS-IV-44-600 in  $\text{CDCl}_3$   
proton spectrum

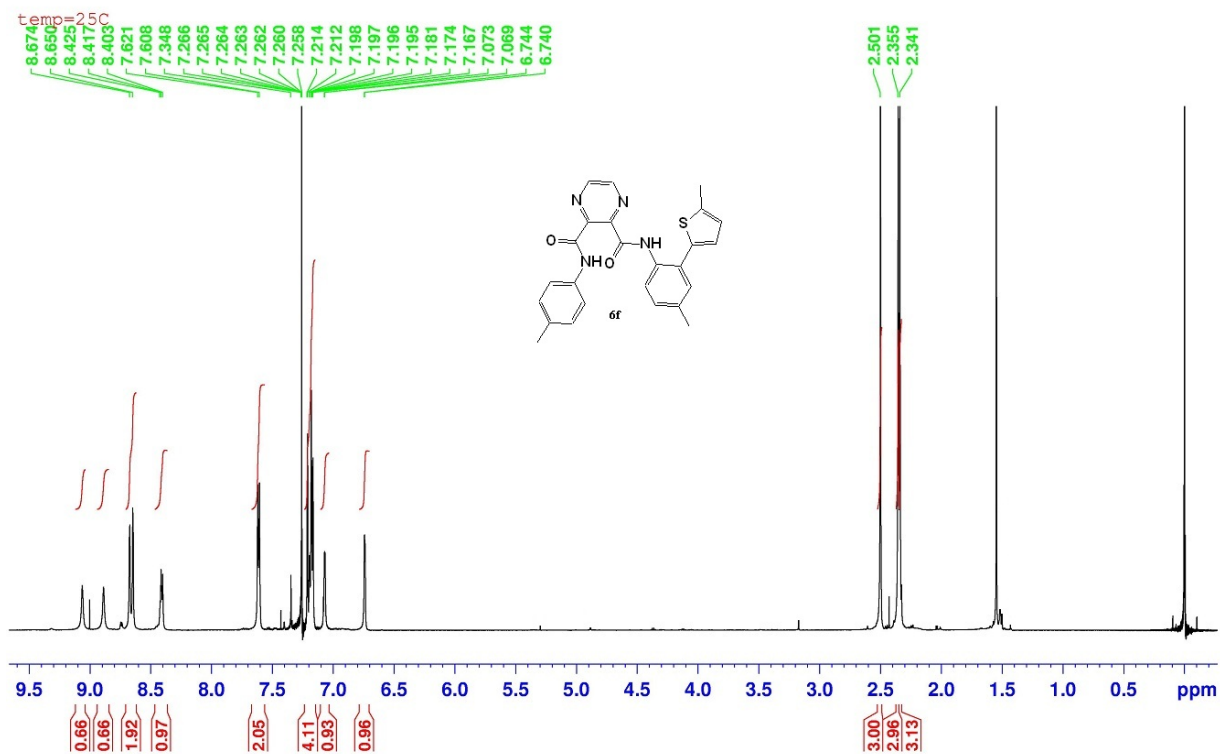

# $^{13}\text{C}$ NMR (150 MHz, $\text{CDCl}_3$ )

MS-IV-44-600 in  $\text{CDCl}_3$   
 $^{13}\text{C}$

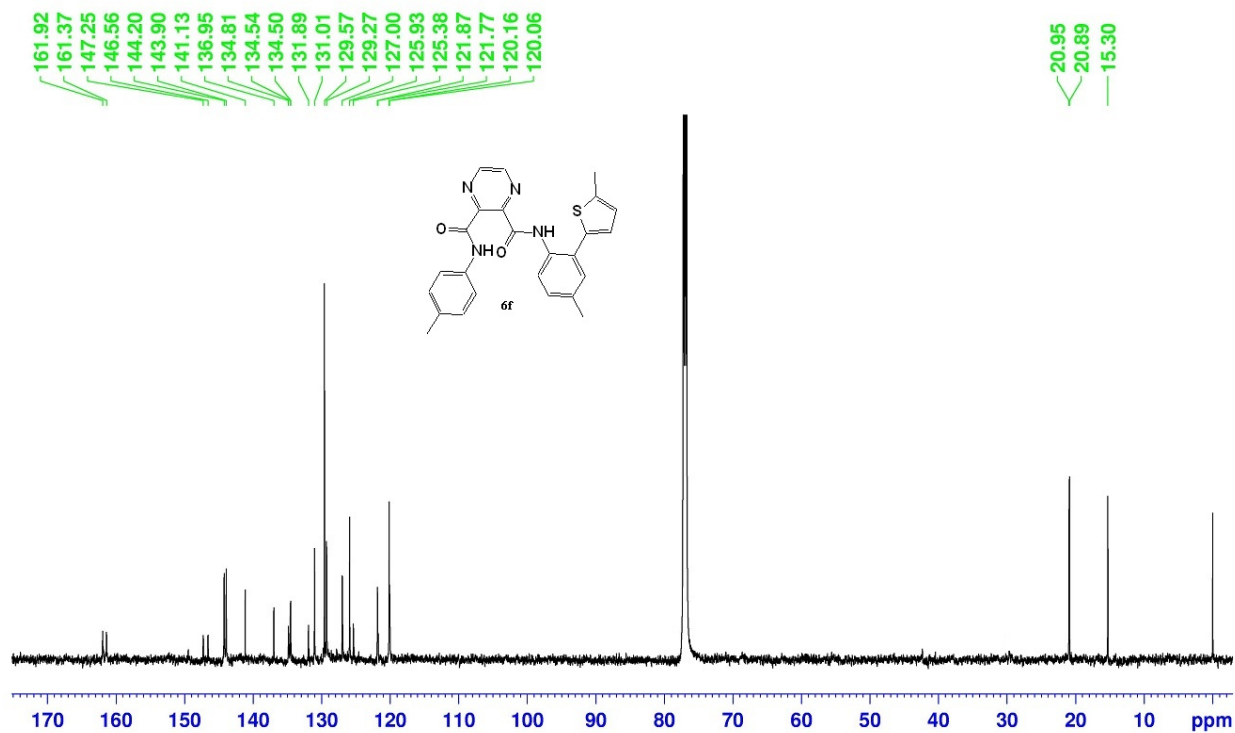

*N*<sup>2</sup>-(4-fluorophenyl)-*N*<sup>3</sup>-(4-methyl-2-(thiophen-3-yl)phenyl)pyrazine-2,3-dicarboxamide (6g)

HRMS

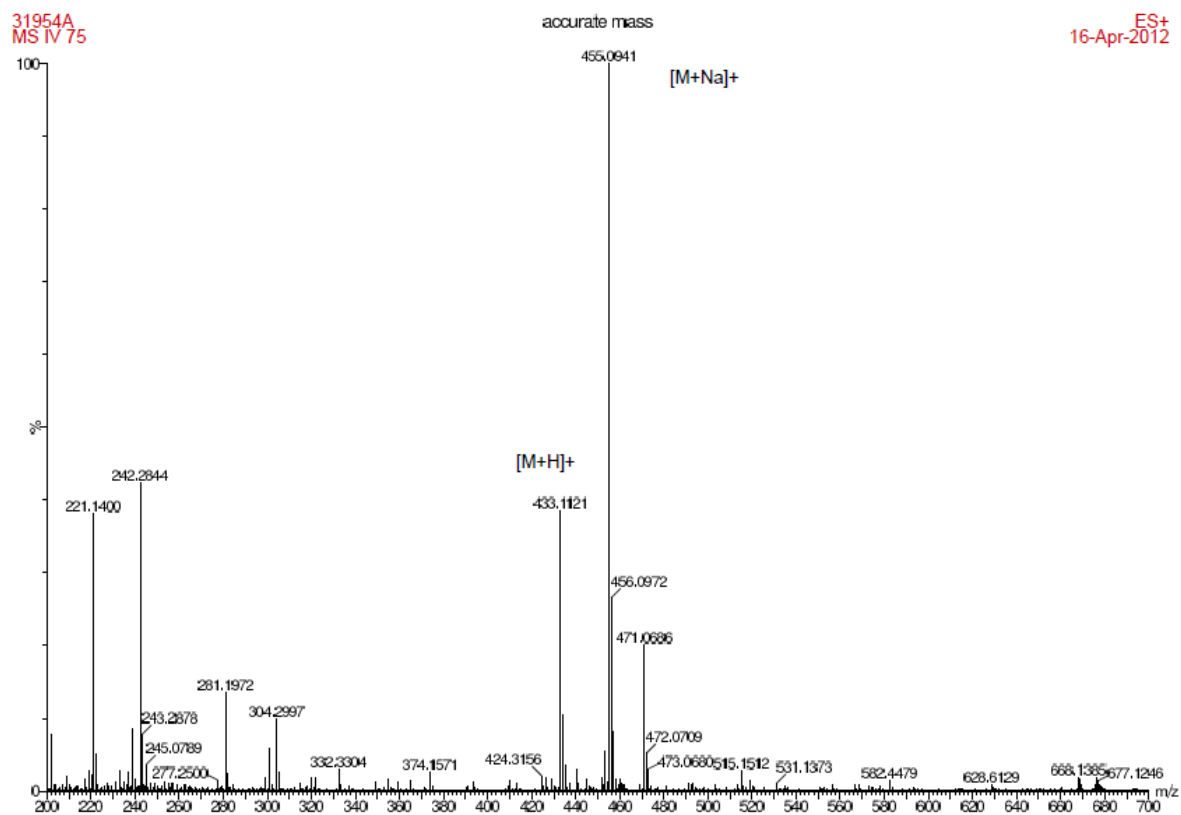

<sup>1</sup>H NMR (500 MHz, CDCl<sub>3</sub>)

MS-IV-75 in CDCl<sub>3</sub>  
proton spectrum  
temp=25C

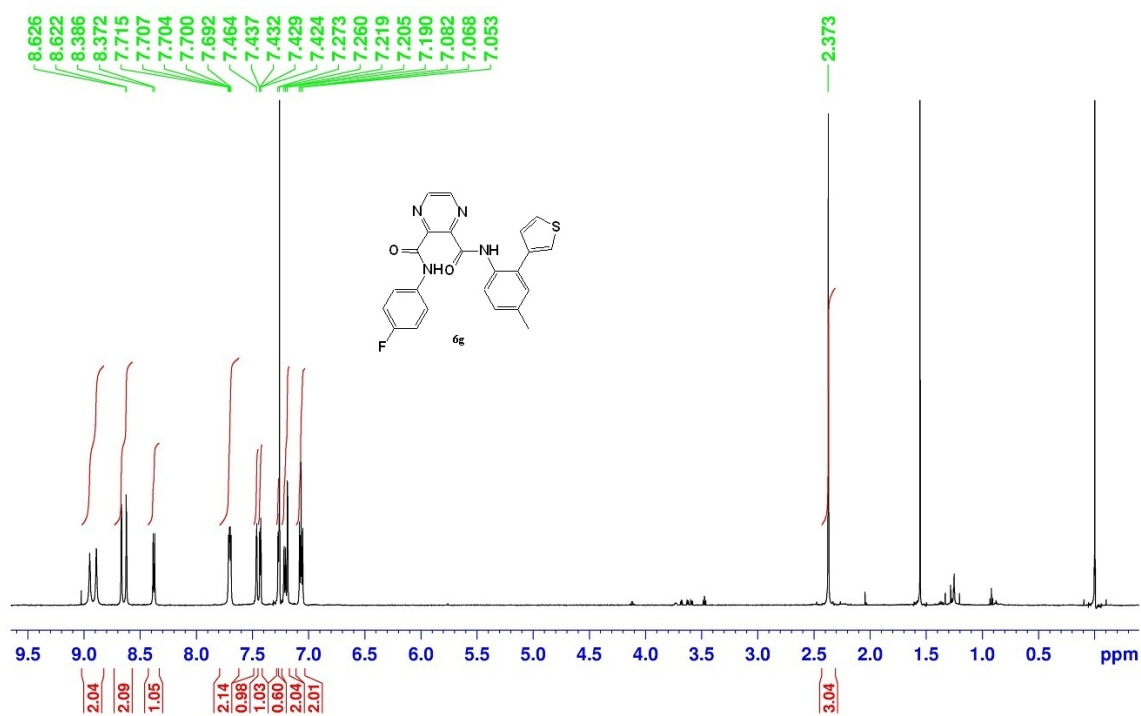

# $^{13}\text{C}$ NMR (125 MHz, $\text{CDCl}_3$ )

MS-IV-75 in  $\text{CDCl}_3$   
temp = 25C  
13C

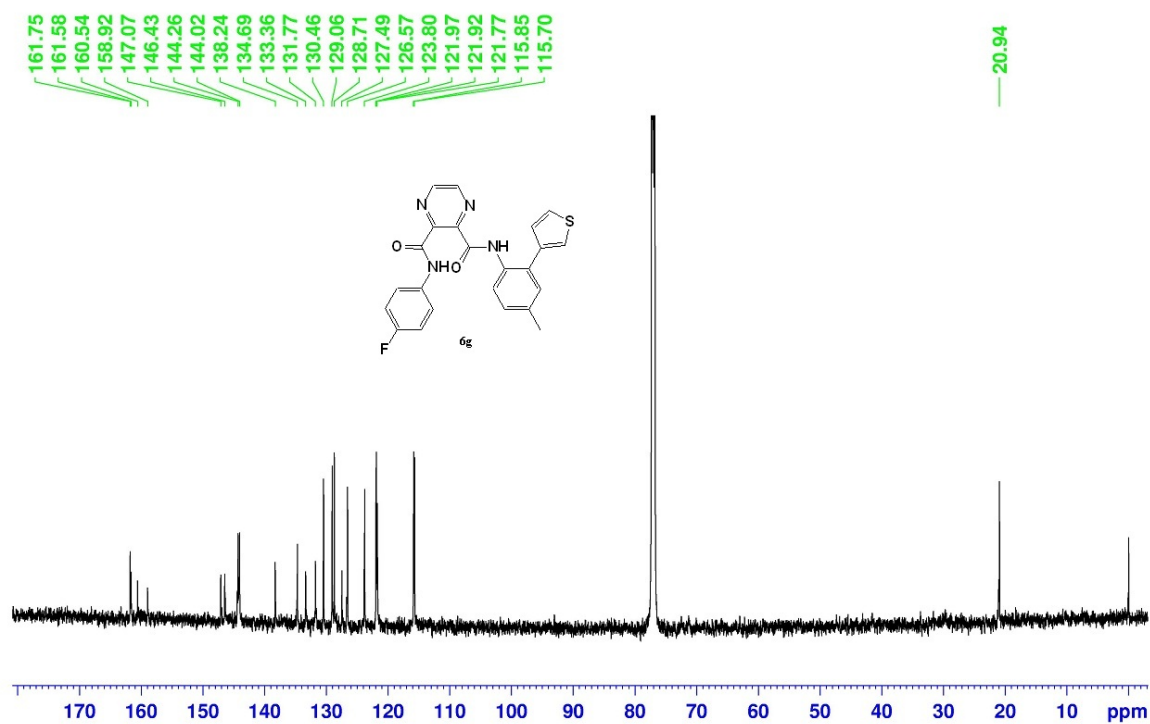

# $N^2$ -(4-methyl-2-(thiophen-3-yl)phenyl)- $N^3$ -(p-tolyl)pyrazine-2,3-dicarboxamide (6h) HRMS

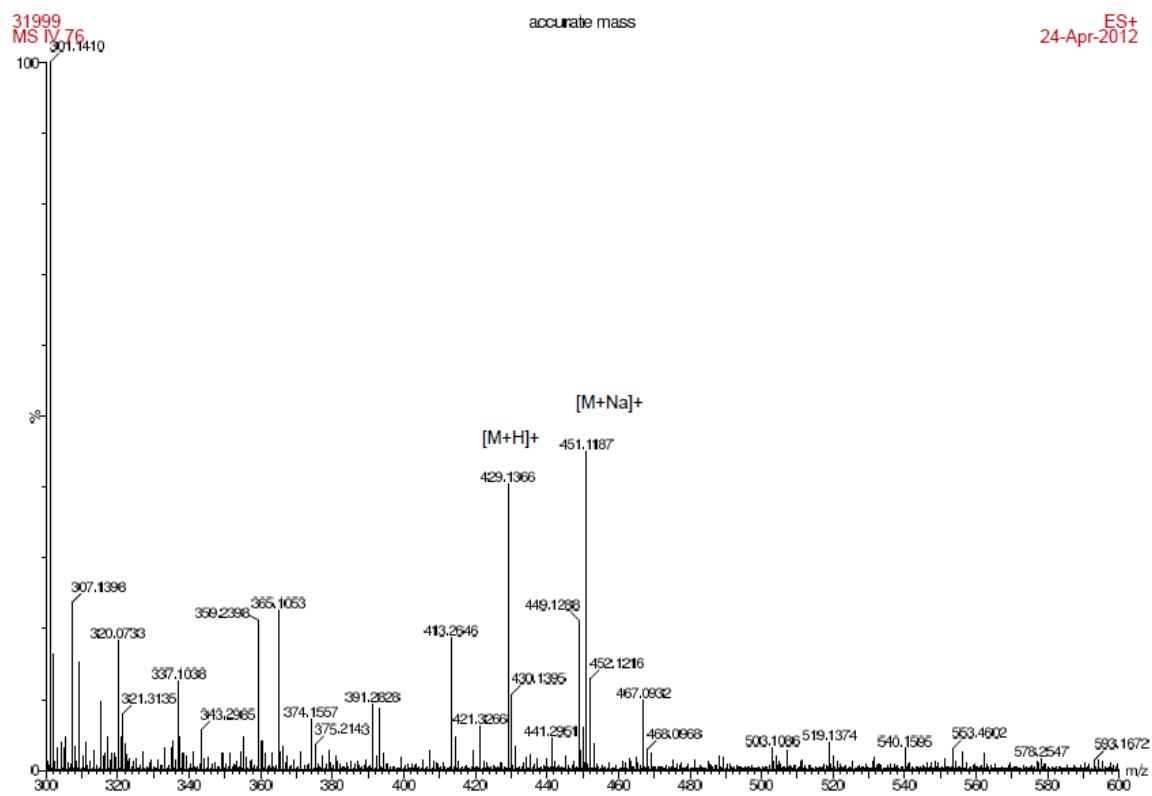

# <sup>1</sup>H NMR (500 MHz, CDCl<sub>3</sub>)

MS-IV-76 in CDCl<sub>3</sub>  
proton spectrum  
temp=25C

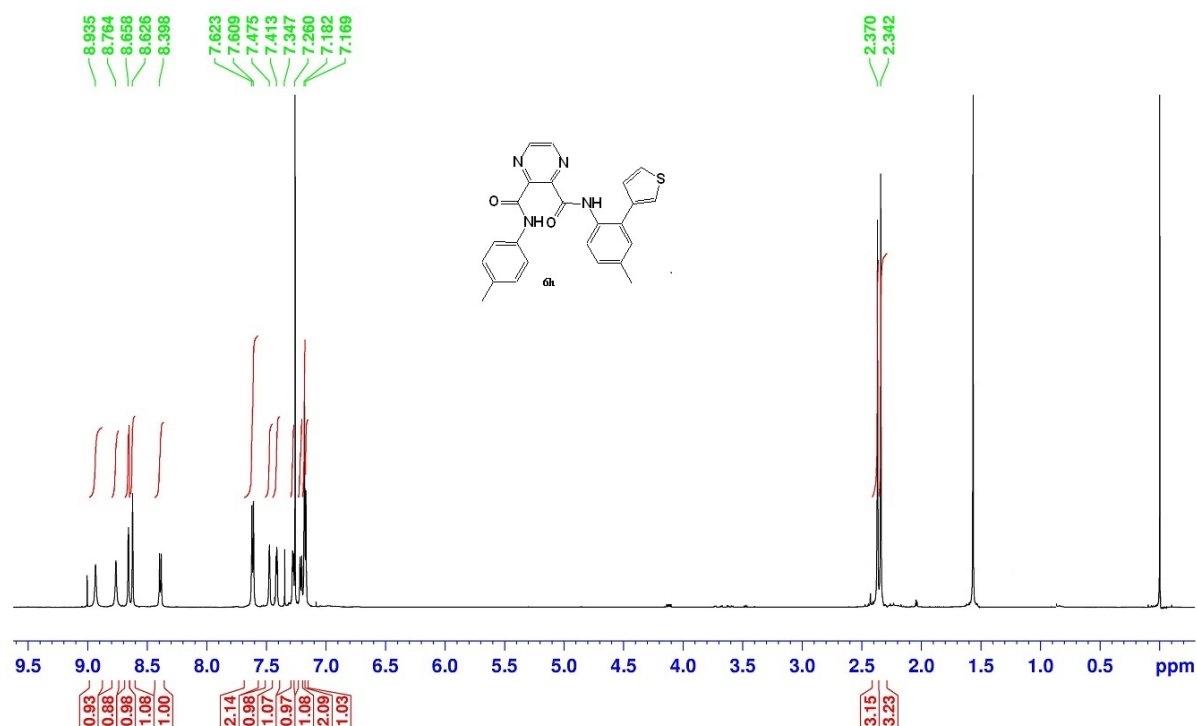

# <sup>13</sup>C NMR (125 MHz, CDCl<sub>3</sub>)

MS-IV-76 in CDCl<sub>3</sub>  
temp = 20C  
13C

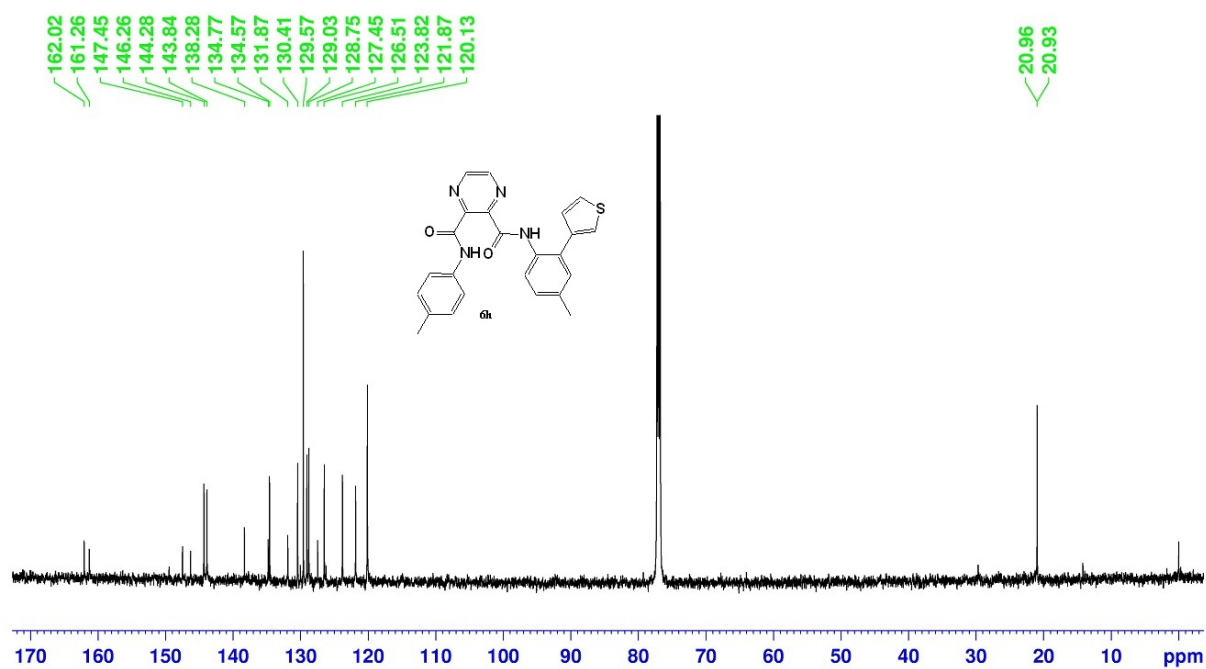

$N^2$ -(4-fluorophenyl)- $N^3$ -(2-(thiophen-3-yl)benzyl)pyrazine-2,3-dicarboxamide (6i)

HRMS

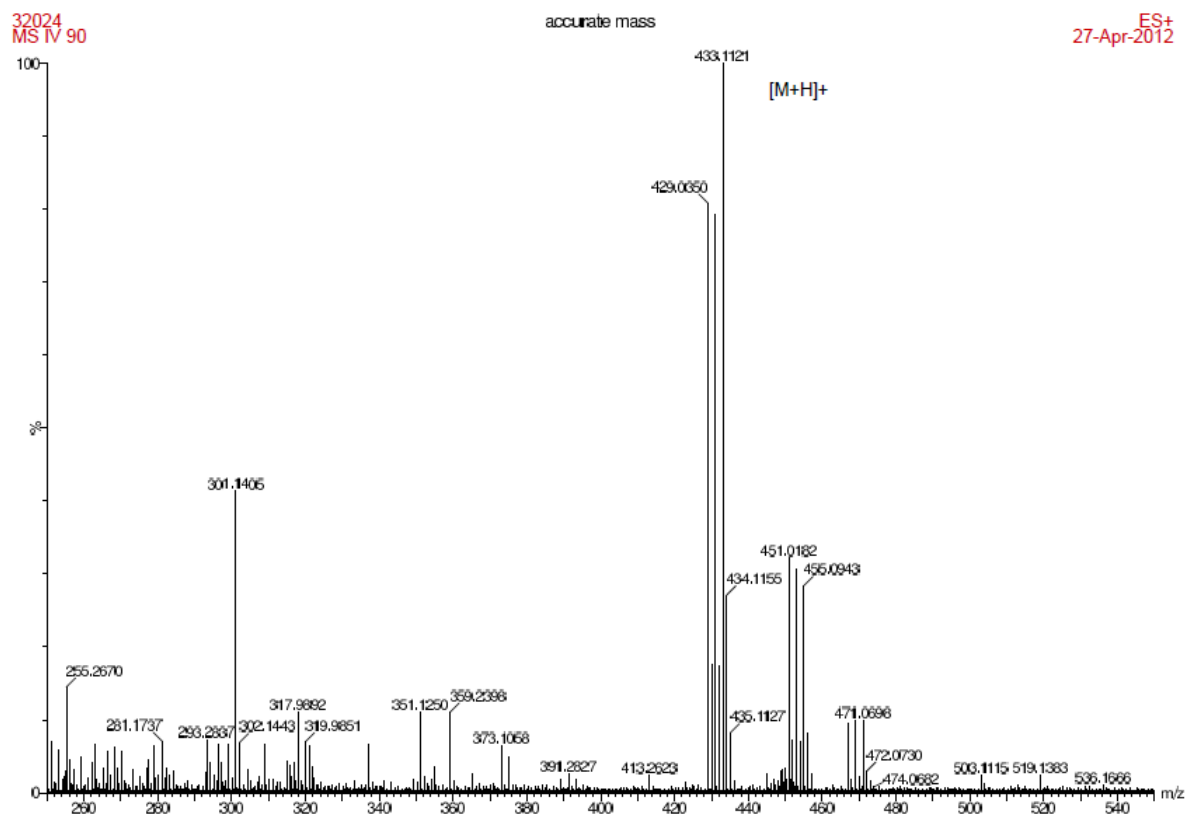

$^1\text{H}$  NMR (300 MHz, DMSO)

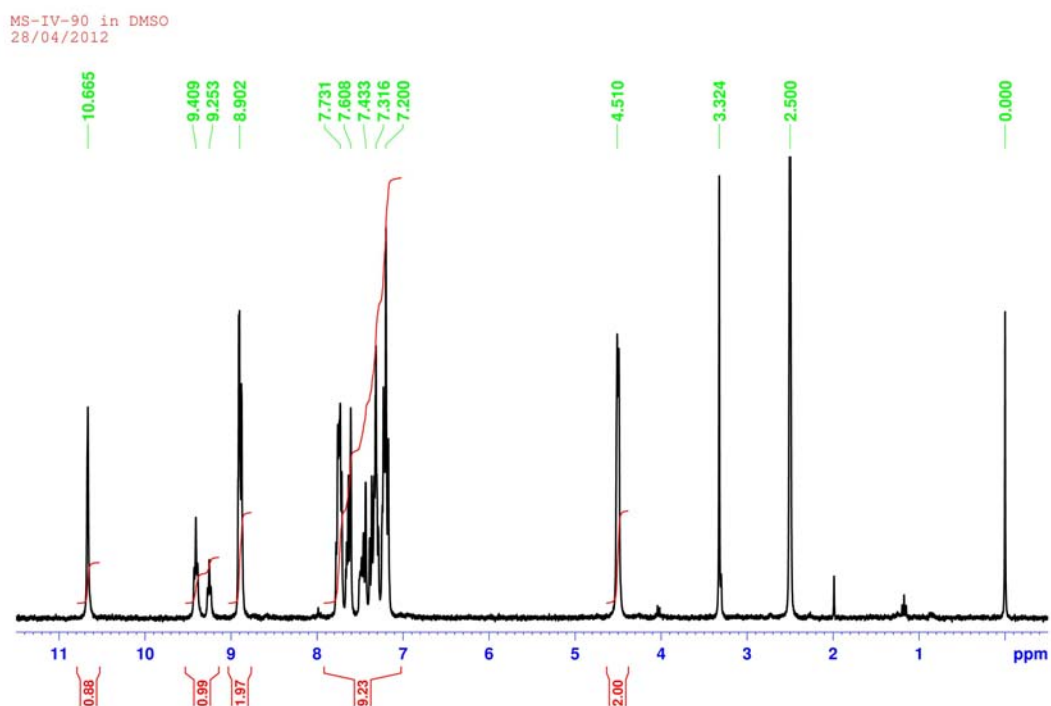

$^{13}\text{C}$  NMR (75 MHz, DMSO)

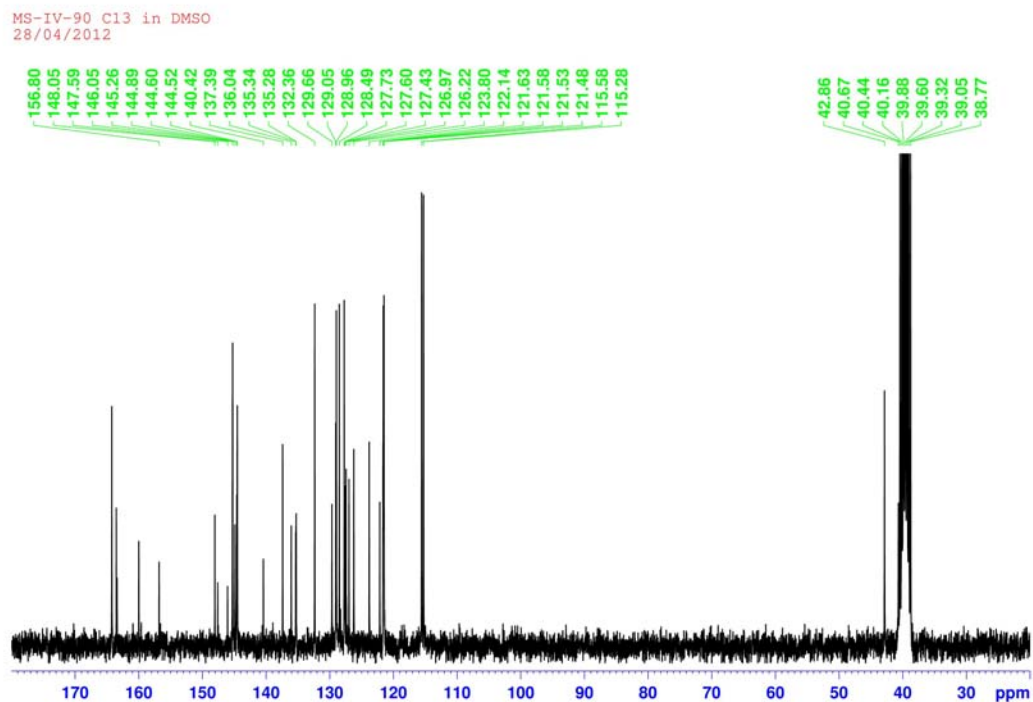

$N^2$ -(2-(thiophen-3-yl)benzyl)- $N^3$ -(p-tolyl)pyrazine-2,3-dicarboxamide (6j)

HRMS

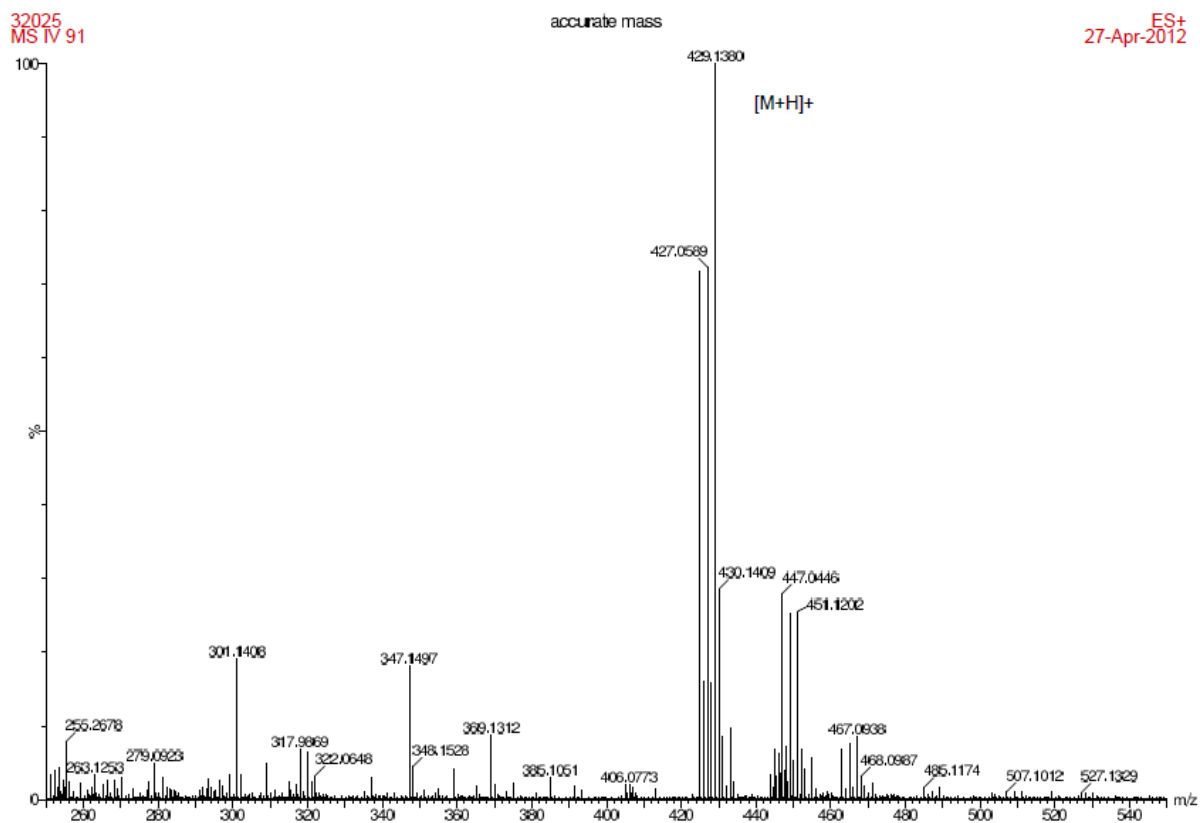



# <sup>1</sup>H NMR (300 MHz, DMSO)

MS-IV-91 in DMSO  
28/04/2012

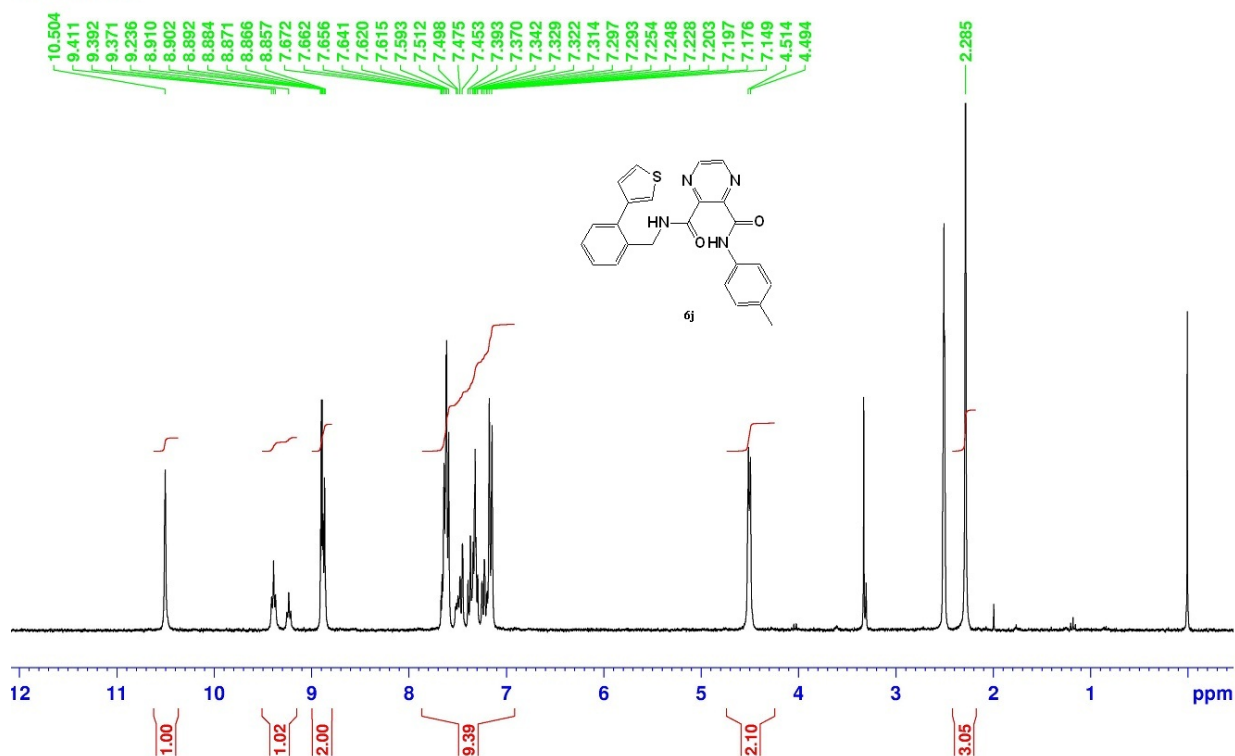

# <sup>13</sup>C NMR (75 MHz, DMSO)

MS-IV-91 C13 in DMSO  
28/04/2012

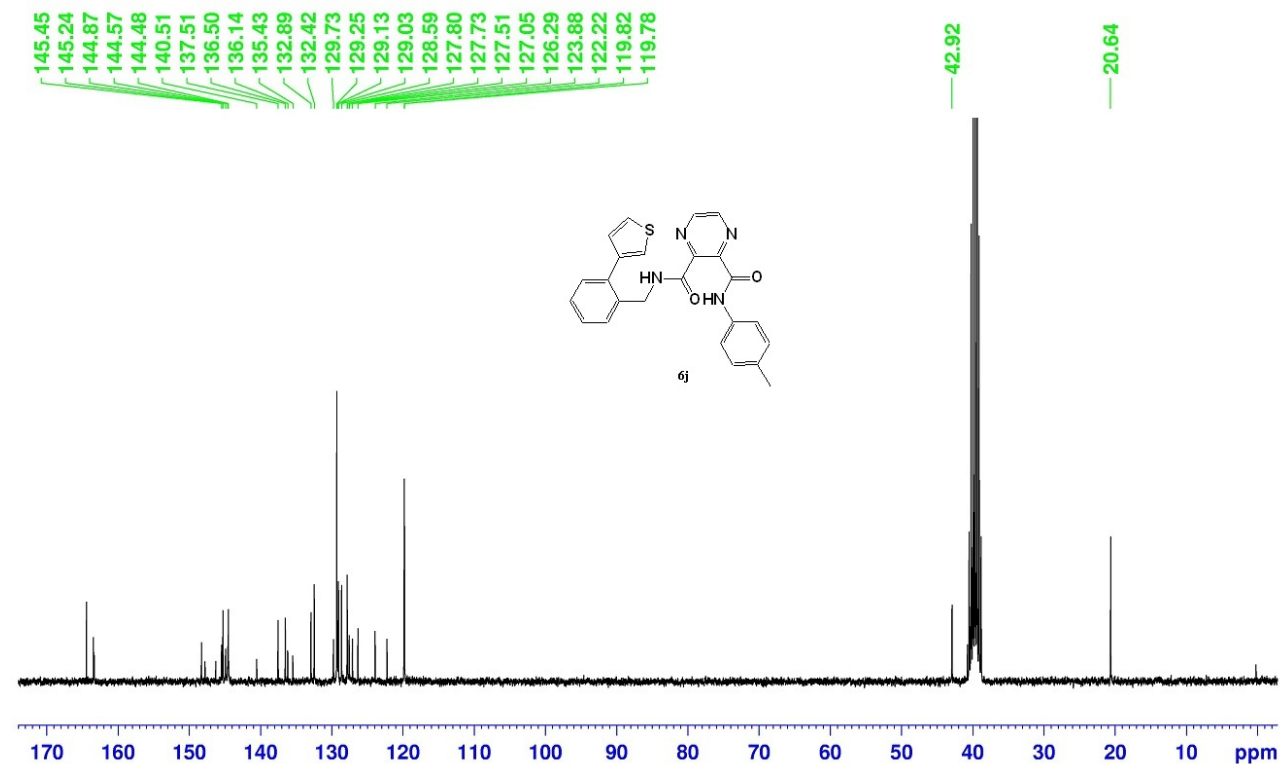

*N*<sup>2</sup>-(4-fluorophenyl)-*N*<sup>3</sup>-(4-(thiophen-3-yl)benzyl)pyrazine-2,3-dicarboxamide (6k)

HRMS

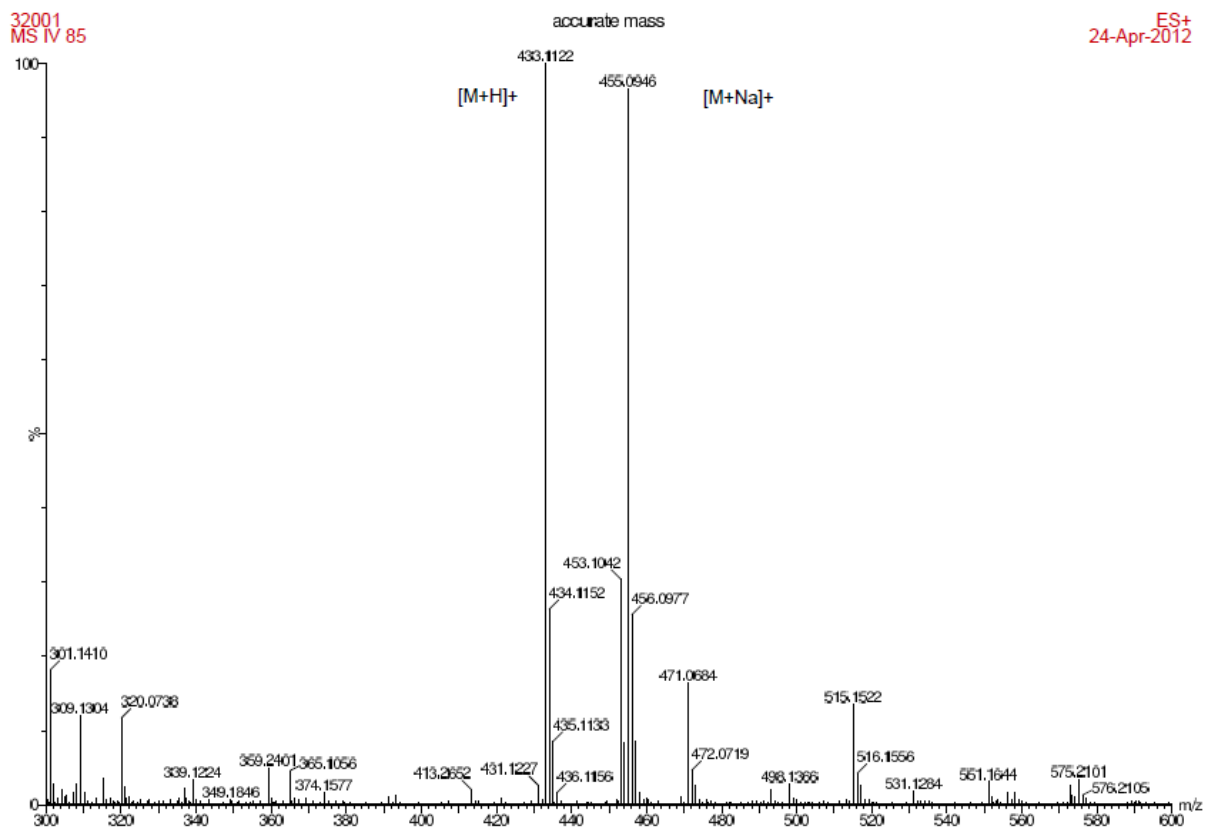

<sup>1</sup>H NMR (300 MHz, DMSO)

MS-IV-85 in DMSO 25/04/2012

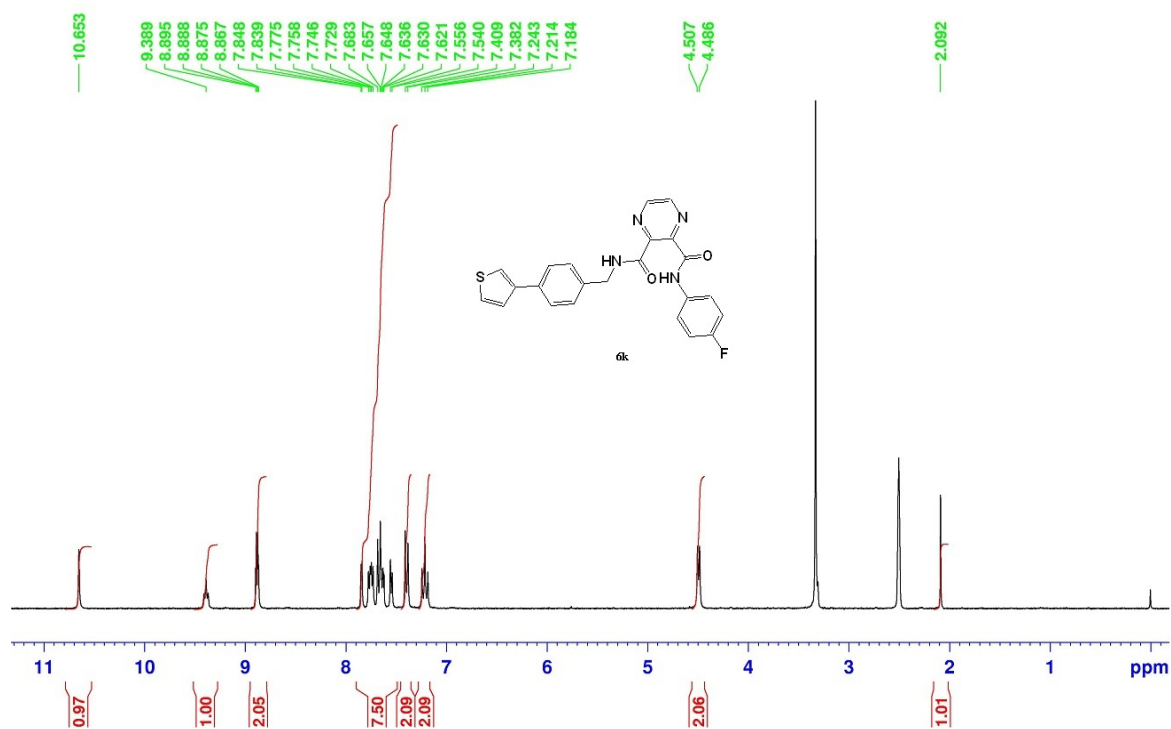

# $^{13}\text{C}$ NMR (75 MHz, DMSO)

MS-IV-85 C13 in DMSO  
25/04/2012

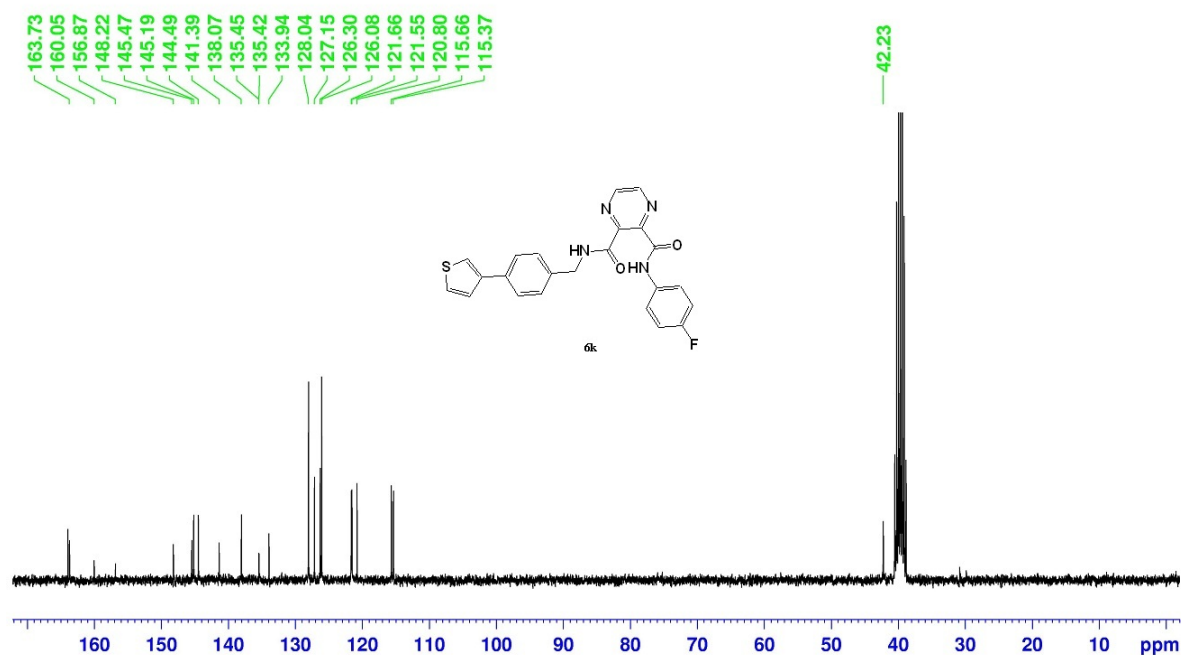

## $N^2$ -(4-(thiophen-3-yl)benzyl)- $N^3$ -(p-tolyl)pyrazine-2,3-dicarboxamide (6l)

### HRMS

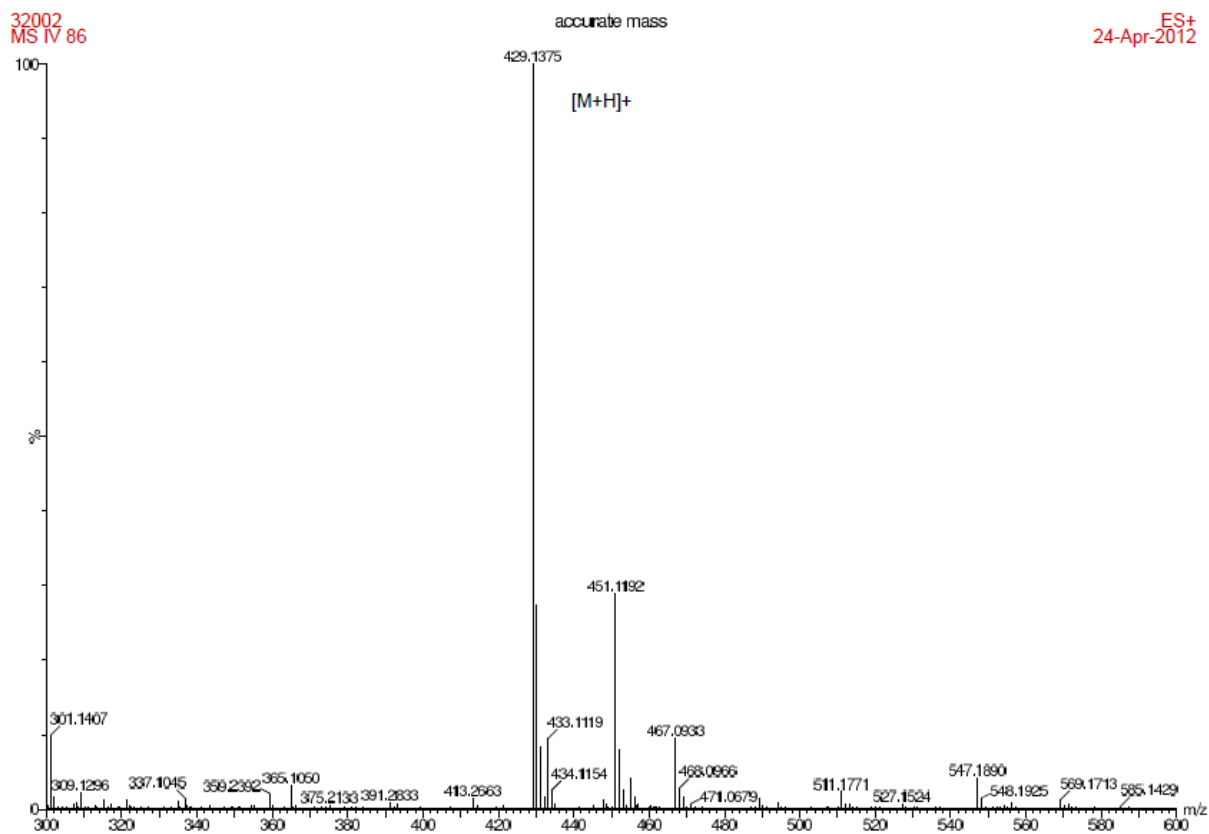

# <sup>1</sup>H NMR (300 MHz, DMSO)

MS-IV-86 in DMSO  
26/04/2012

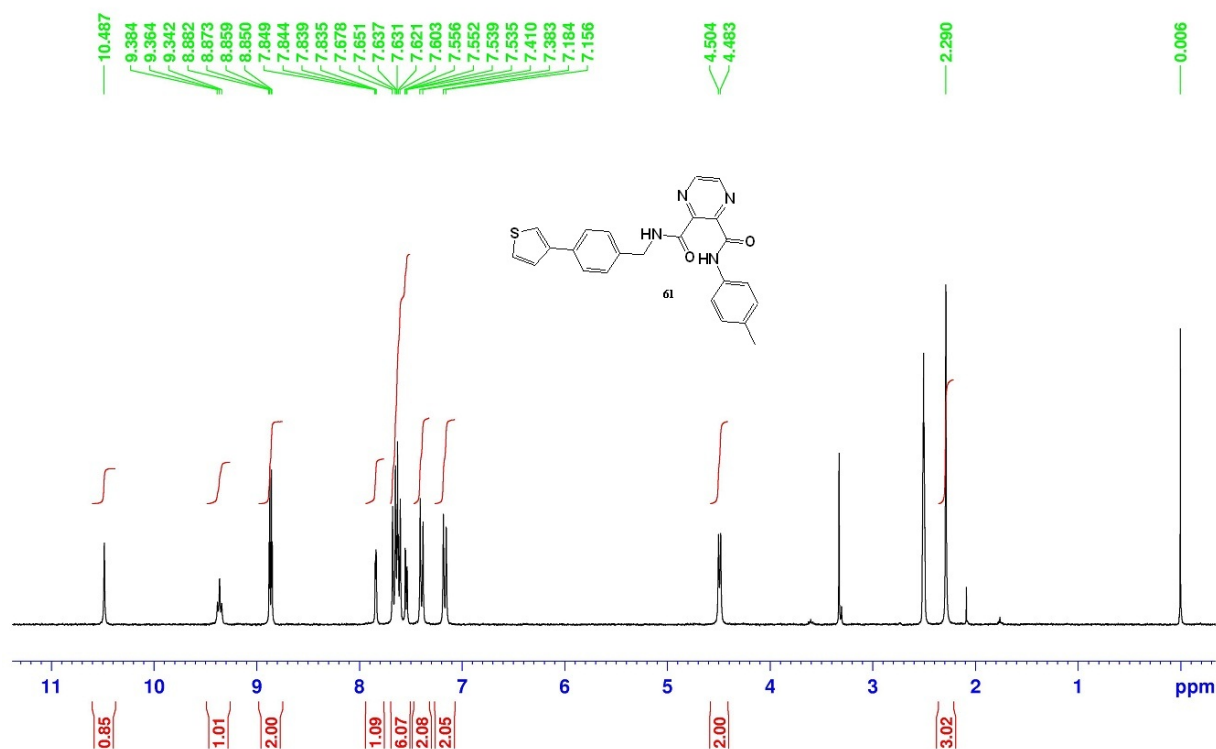

# <sup>13</sup>C NMR (75 MHz, DMSO)

MS-IV-86 C13 in DMSO  
26/04/2012

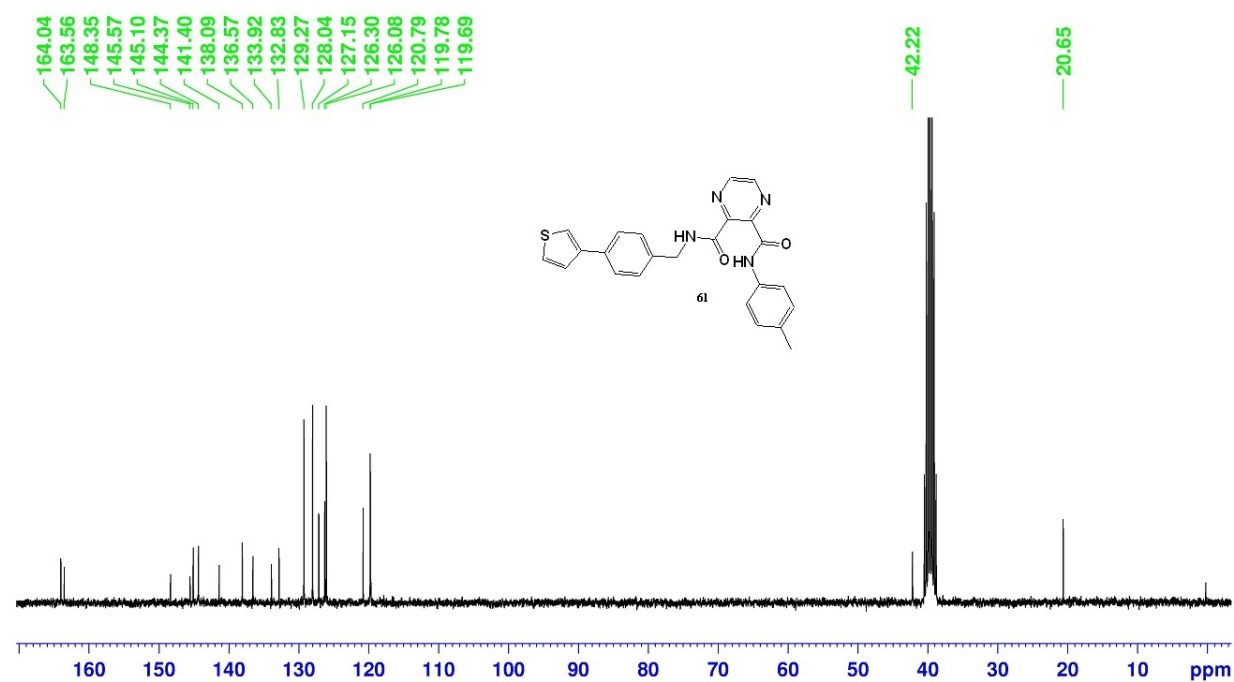

*N*<sup>2</sup>-(4-fluorophenyl)-*N*<sup>3</sup>-(2-(3-methyl-1H-pyrazol-5-yl)phenyl)pyrazine-2,3-dicarboxamide (6m)

HRMS

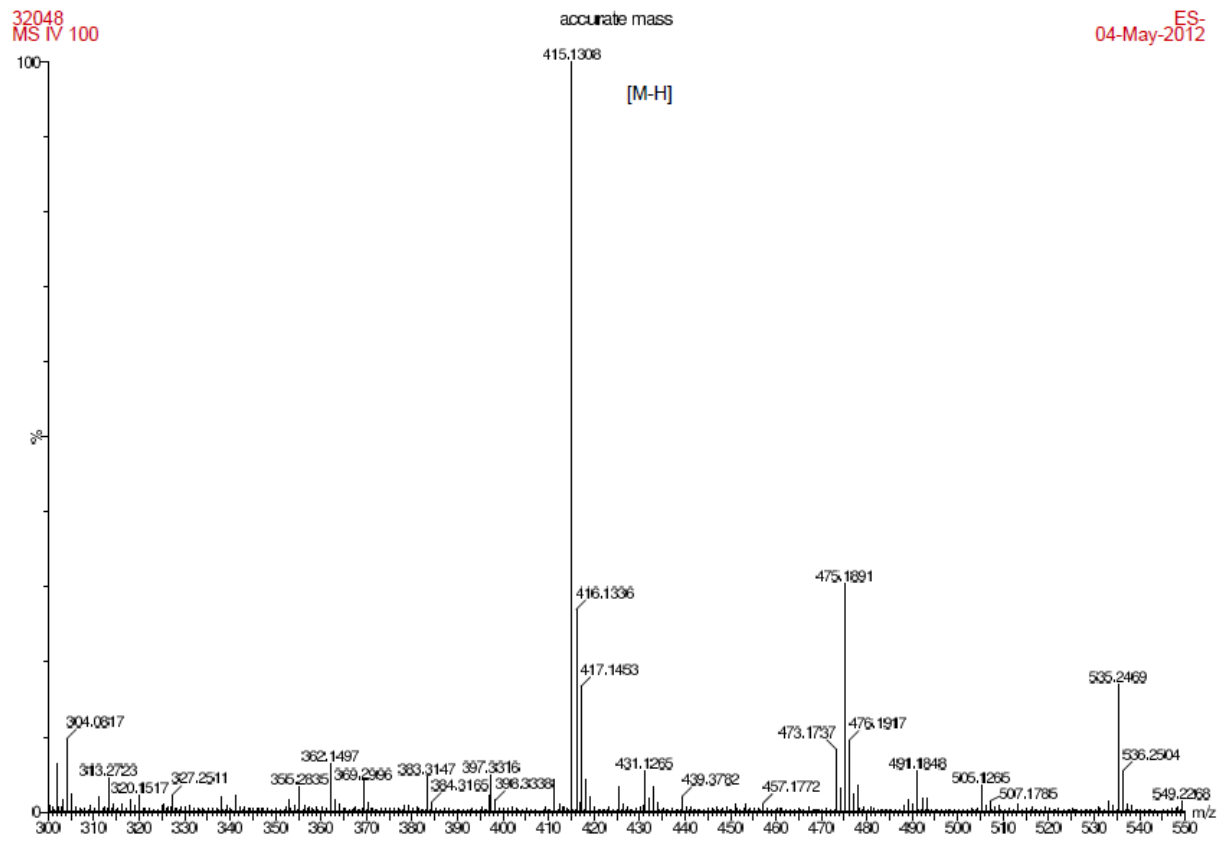

<sup>1</sup>H NMR (300 MHz, DMSO)

MS-IV-100 in DMSO  
03/05/2012

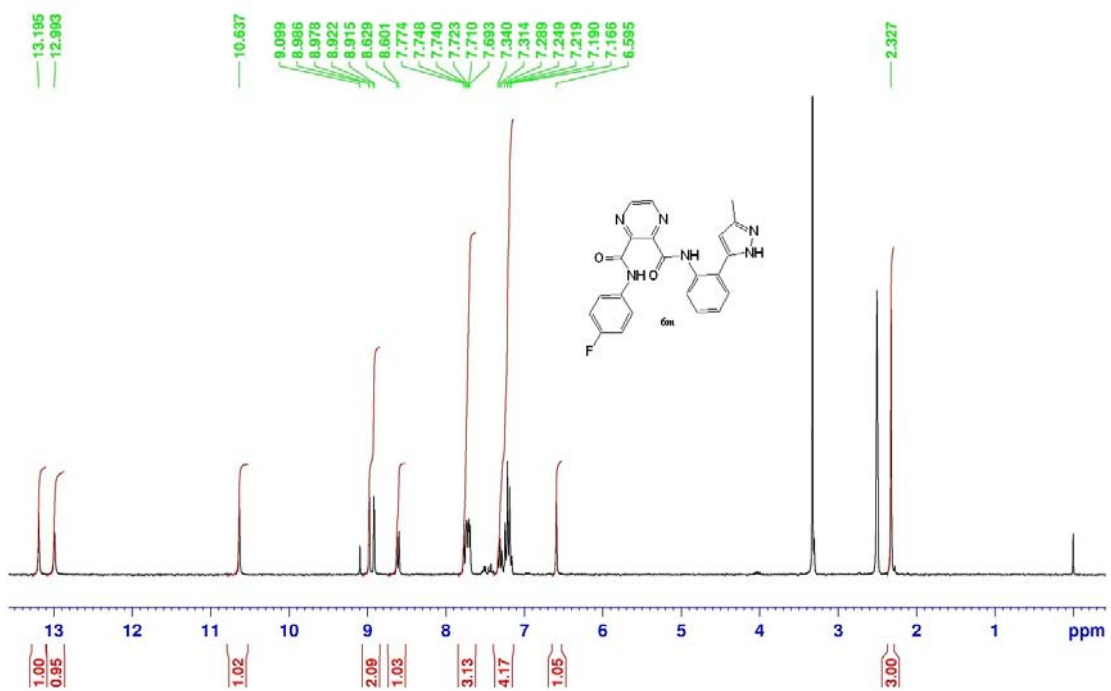

# $^{13}\text{C}$ NMR (75 MHz, DMSO)

MS-IV-100 in DMSO  
carbon spectrum

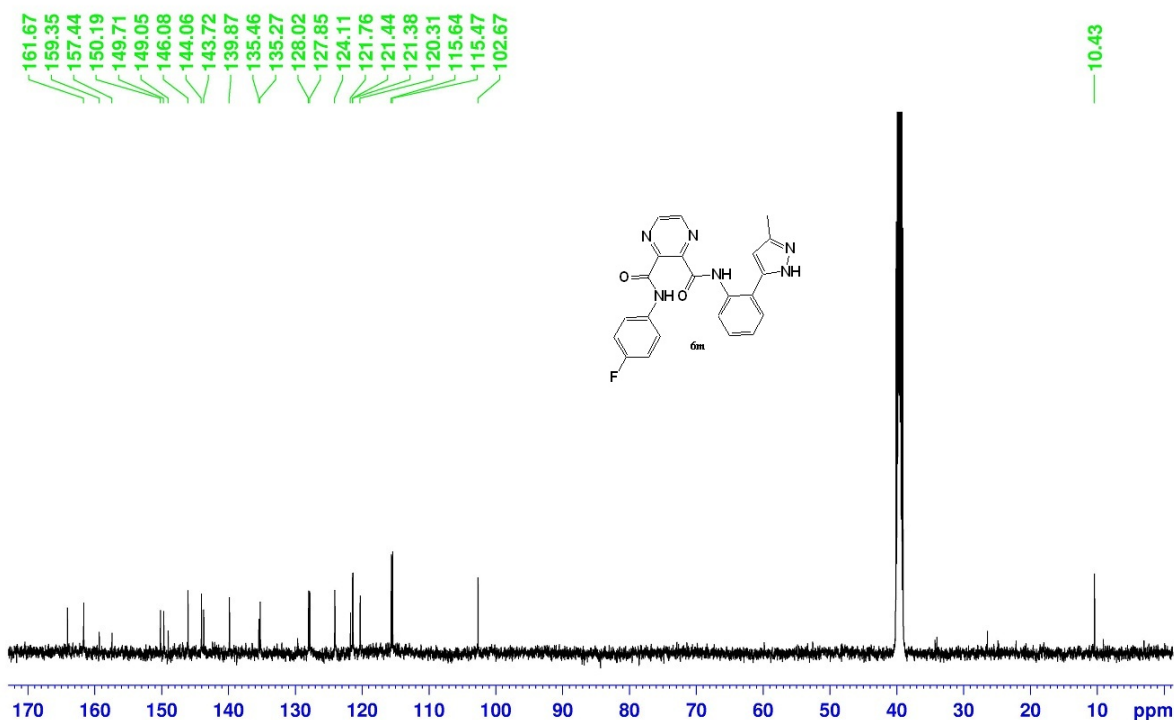

*N*<sup>2</sup>-(2-(3-methyl-1H-pyrazol-5-yl)phenyl)-*N*<sup>3</sup>-(p-tolyl)pyrazine-2,3-dicarboxamide  
(6n)  
HRMS

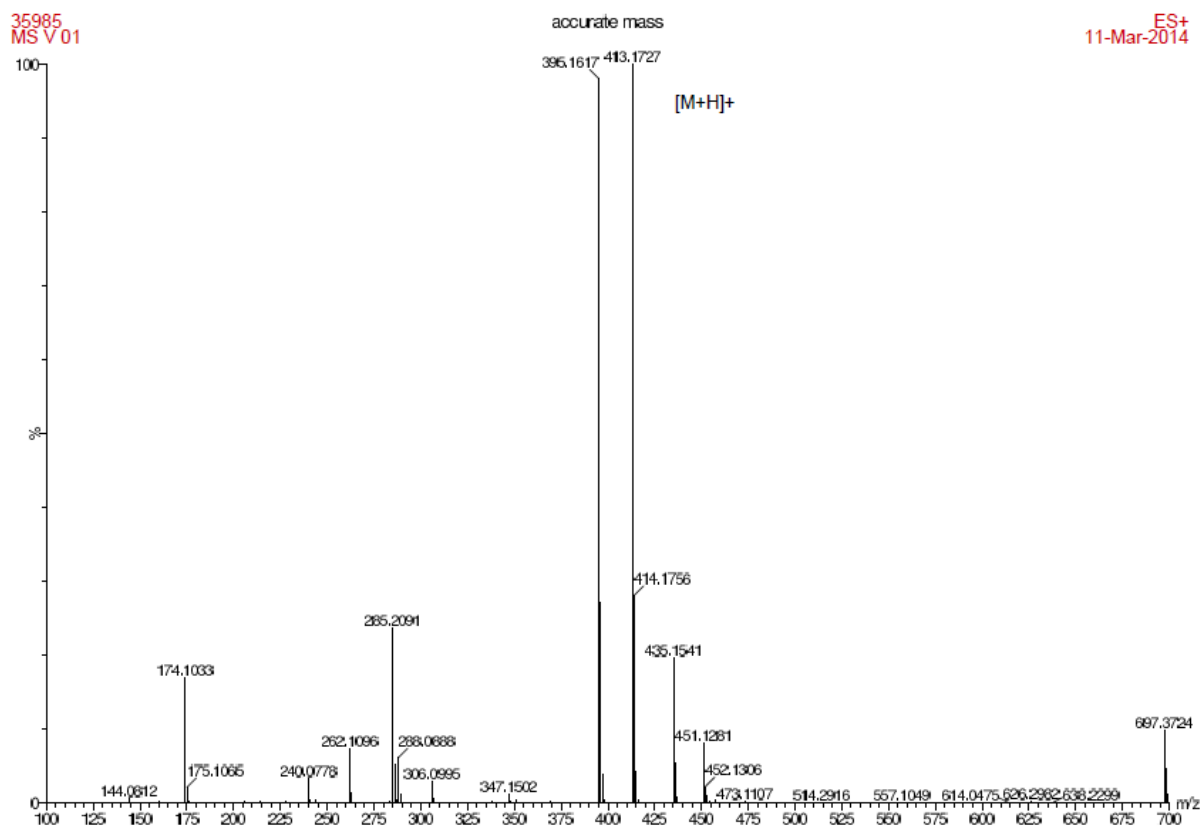

# <sup>1</sup>H NMR (300 MHz, DMSO)

MS-V-01 in DMSO  
proton spectrum

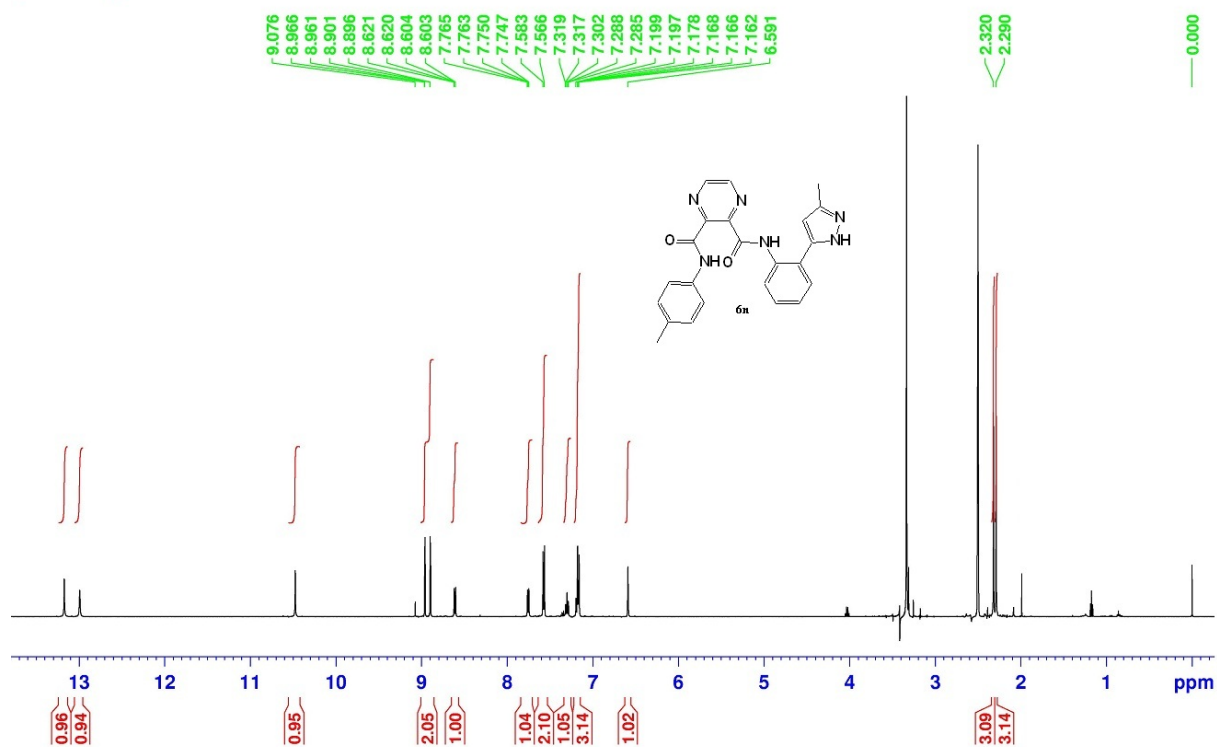

# <sup>13</sup>C NMR (75 MHz, DMSO)

MS-V-01 in DMSO  
carbon spectrum

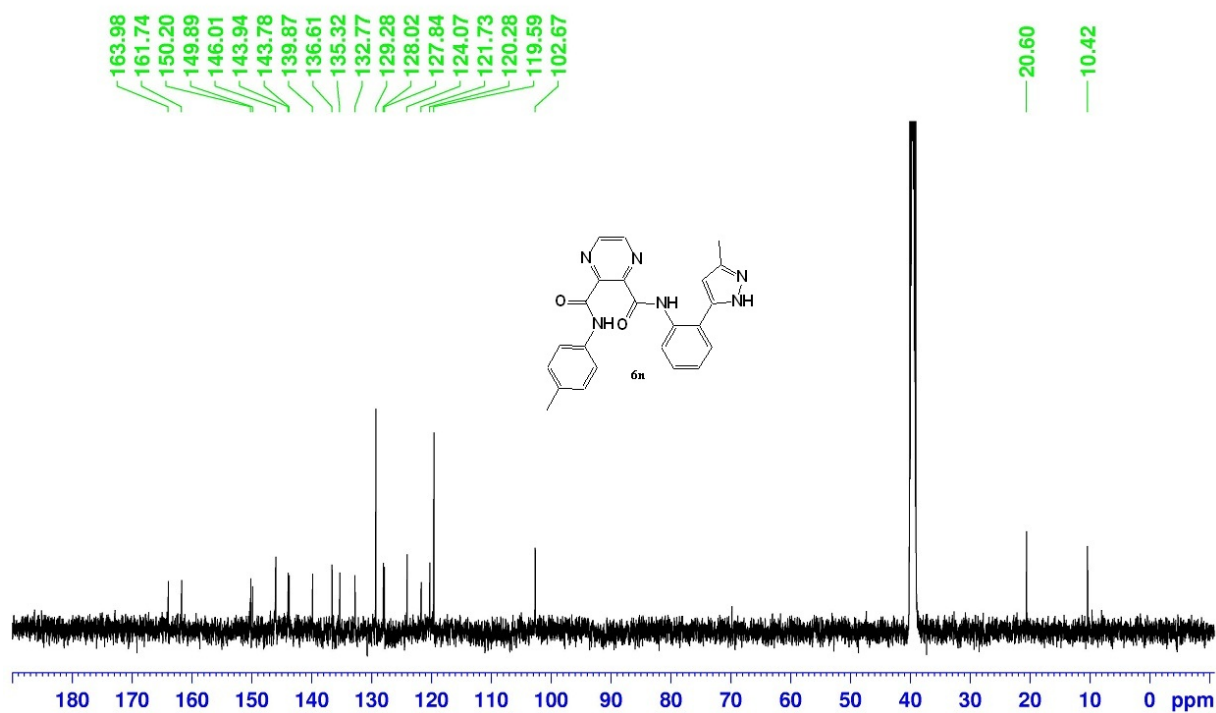

*N*<sup>1</sup>-(4-fluorophenyl)-*N*<sup>2</sup>-(4-methyl-2-(3-methyl-1H-pyrazol-5-yl)phenyl)phthalamide  
(7a)

HRMS

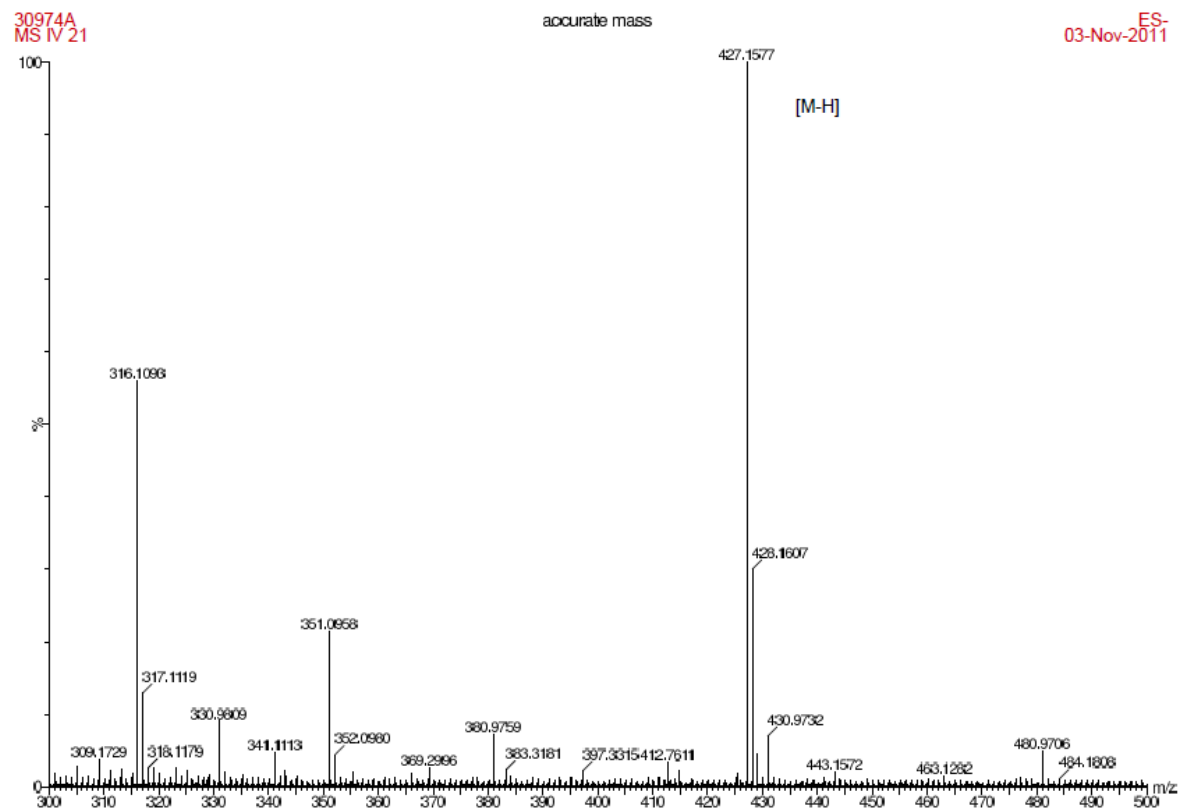

<sup>1</sup>H NMR (600 MHz, DMSO)

MS-IV-21-600 in DMSO  
proton spectrum  
temp=25C

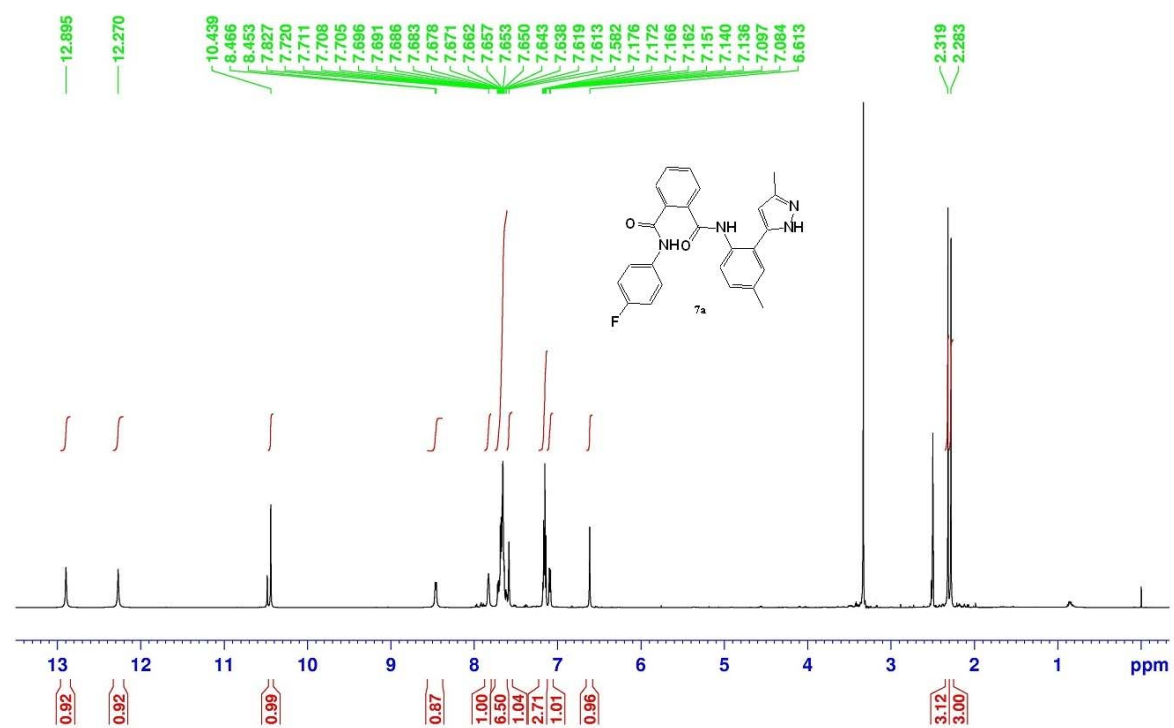



# $^{13}\text{C}$ NMR (150 MHz, DMSO)

MS-IV-21-600 in DMSO  
 $^{13}\text{C}$   
 $^1\text{H}$  decoupled

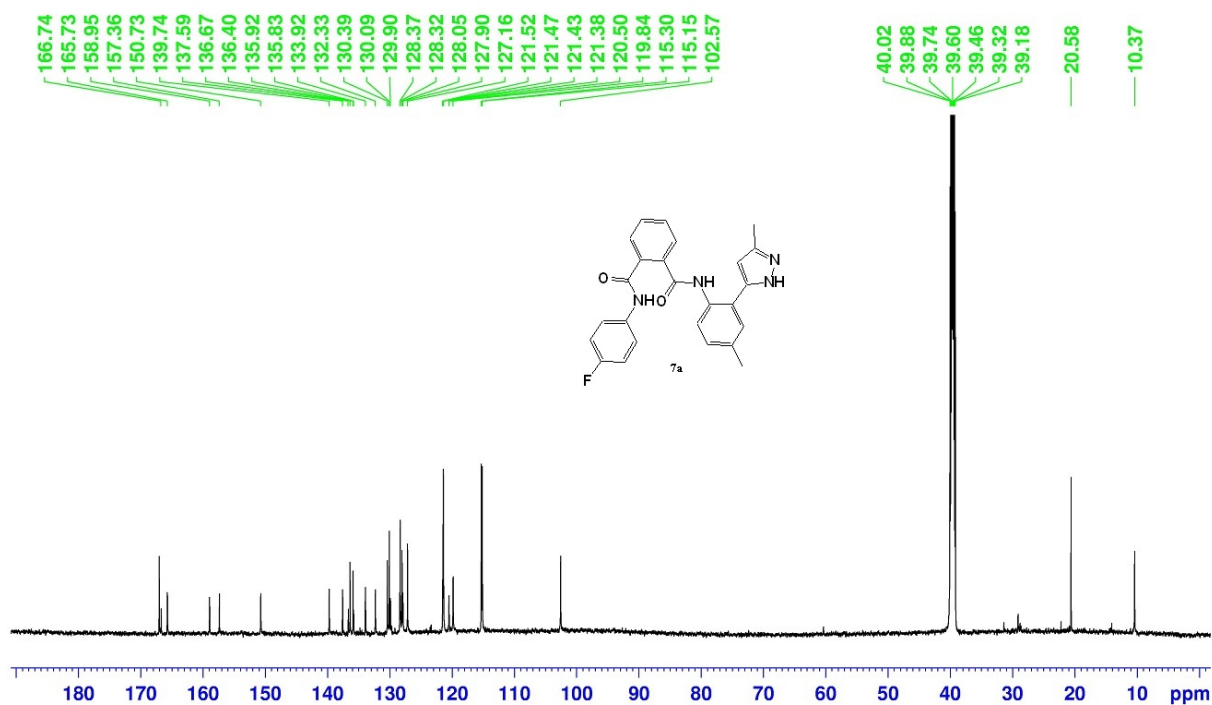

## $N^1$ -(4-fluorophenyl)- $N^2$ -(4-methyl-2-(thiophen-2-yl)phenyl)phthalamide (7b)

### HRMS

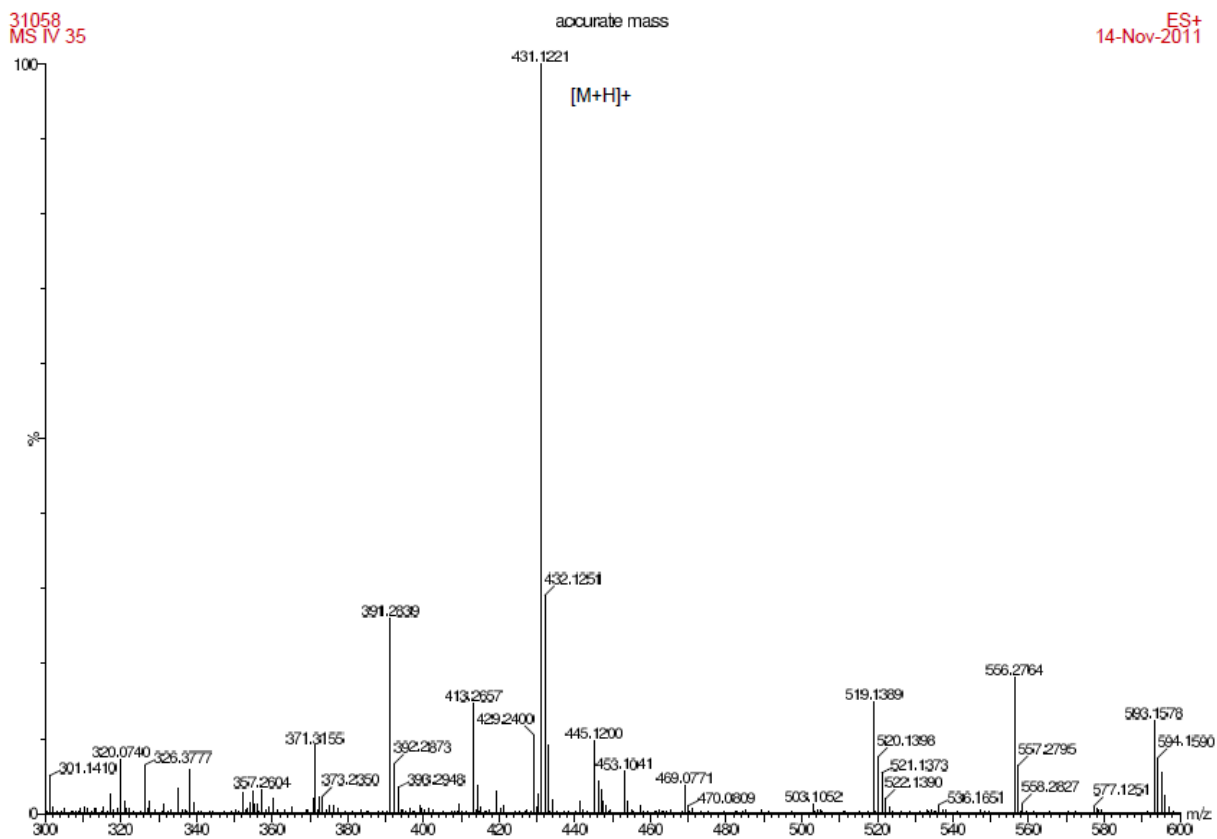

# <sup>1</sup>H NMR (600 MHz, DMSO)

MS-IV-35-600 in DMSO  
proton spectrum  
temp=25C

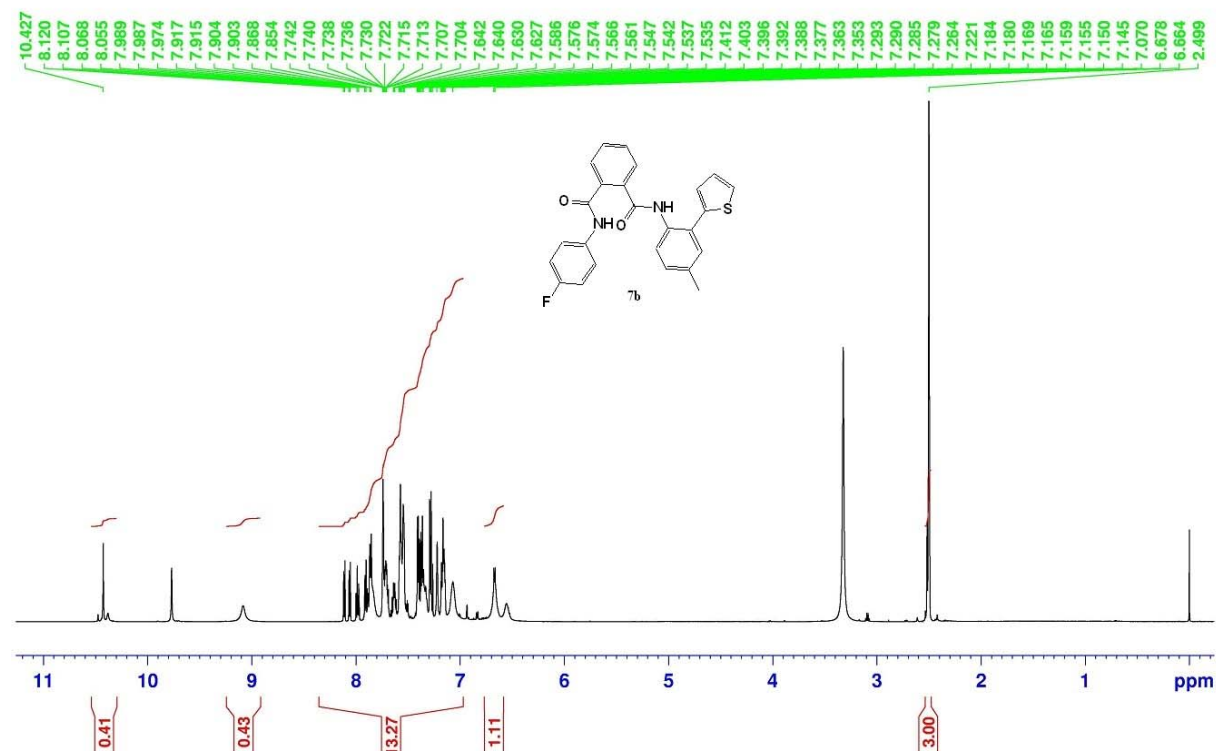

# <sup>13</sup>C NMR (150 MHz, DMSO)

MS-IV-35-600 in DMSO  
C13 spectrum  
temp=25C

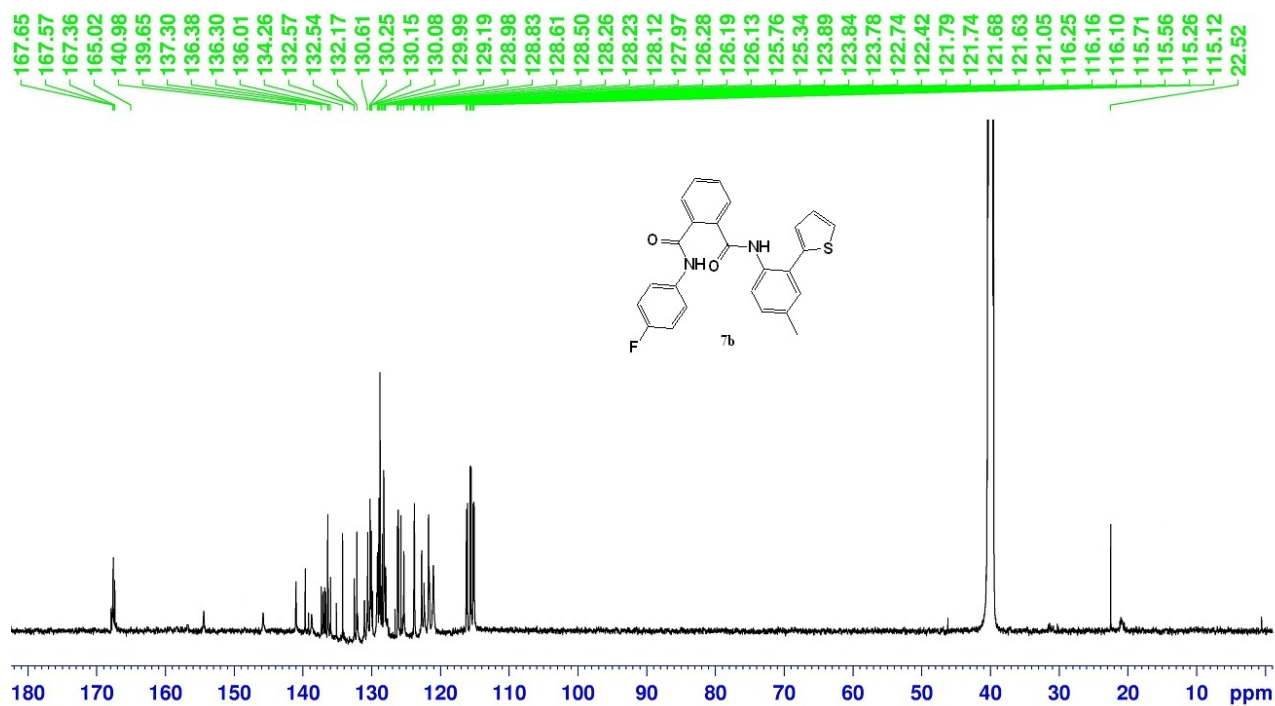

$N^1$ -(4-methyl-2-(3-methyl-1H-pyrazol-5-yl)phenyl)- $N^2$ -(p-tolyl)phthalamide (7c):

HRMS

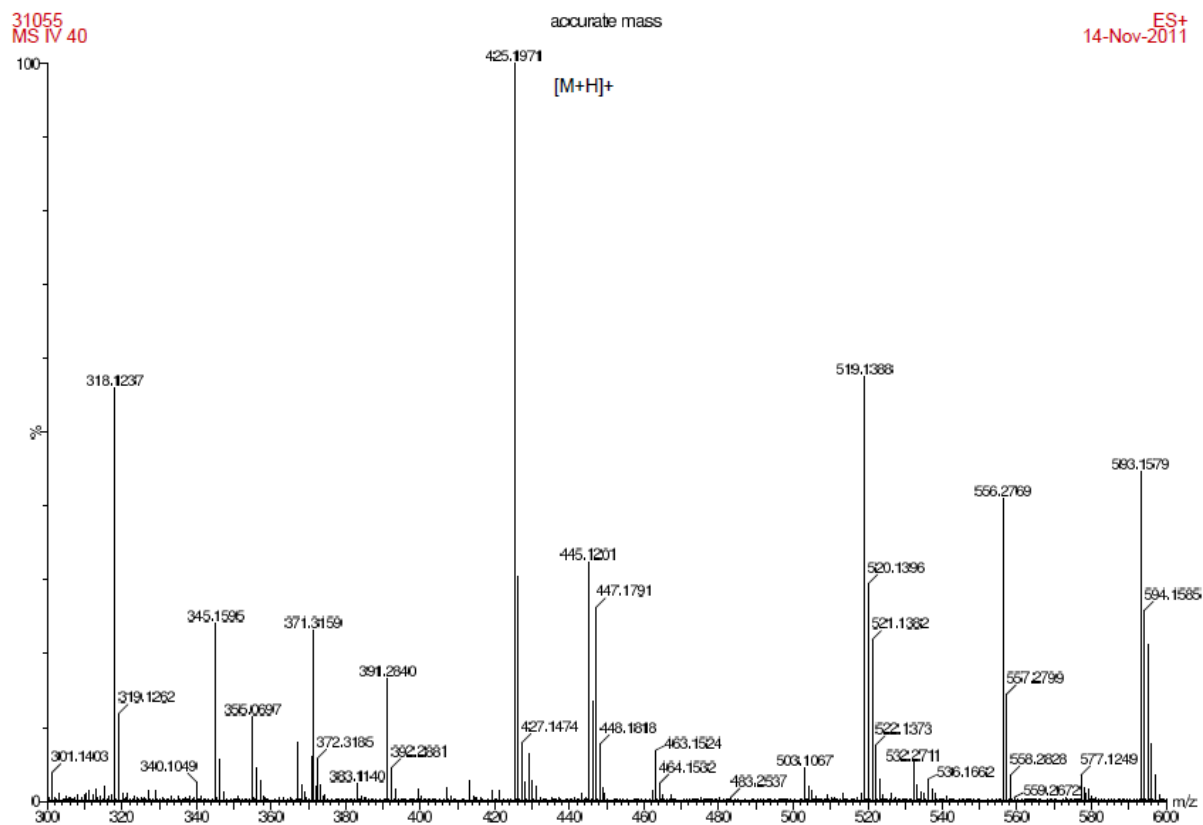

$^1\text{H}$  NMR (600 MHz, DMSO)

MS-IV-40-600 in DMSO  
proton spectrum  
temp=25C

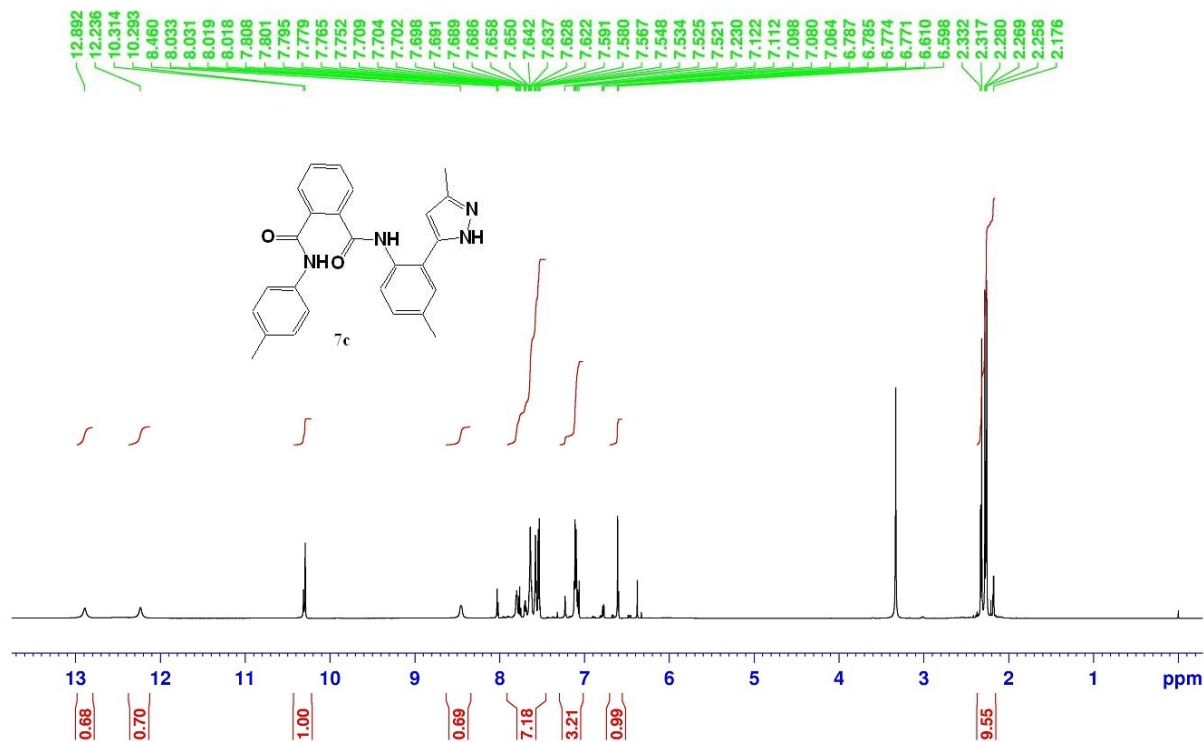

$^{13}\text{C}$  NMR (150 MHz, DMSO)

MS-IV-40-600 in DMSO  
 $^{13}\text{C}$   
 $^1\text{H}$  decoupled

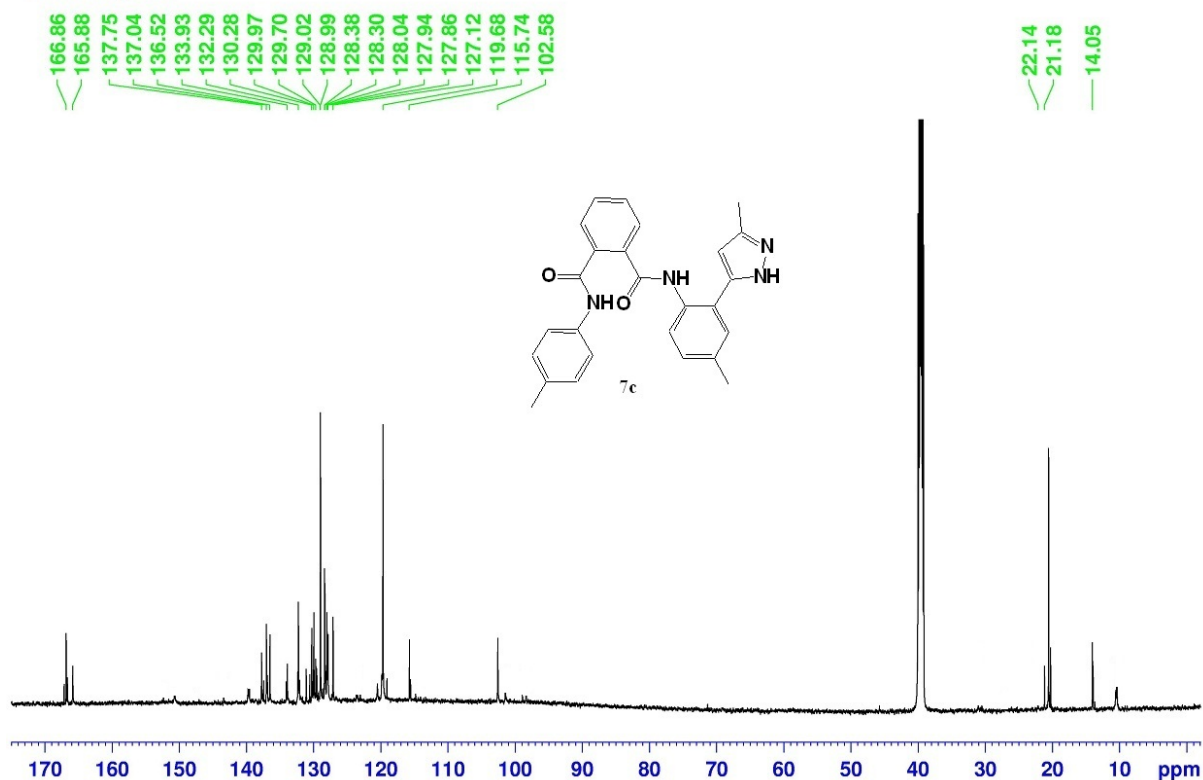

$N^1$ -(4-methyl-2-(thiophen-2-yl)phenyl)- $N^2$ -(p-tolyl)phthalamide (**7d**)

HRMS

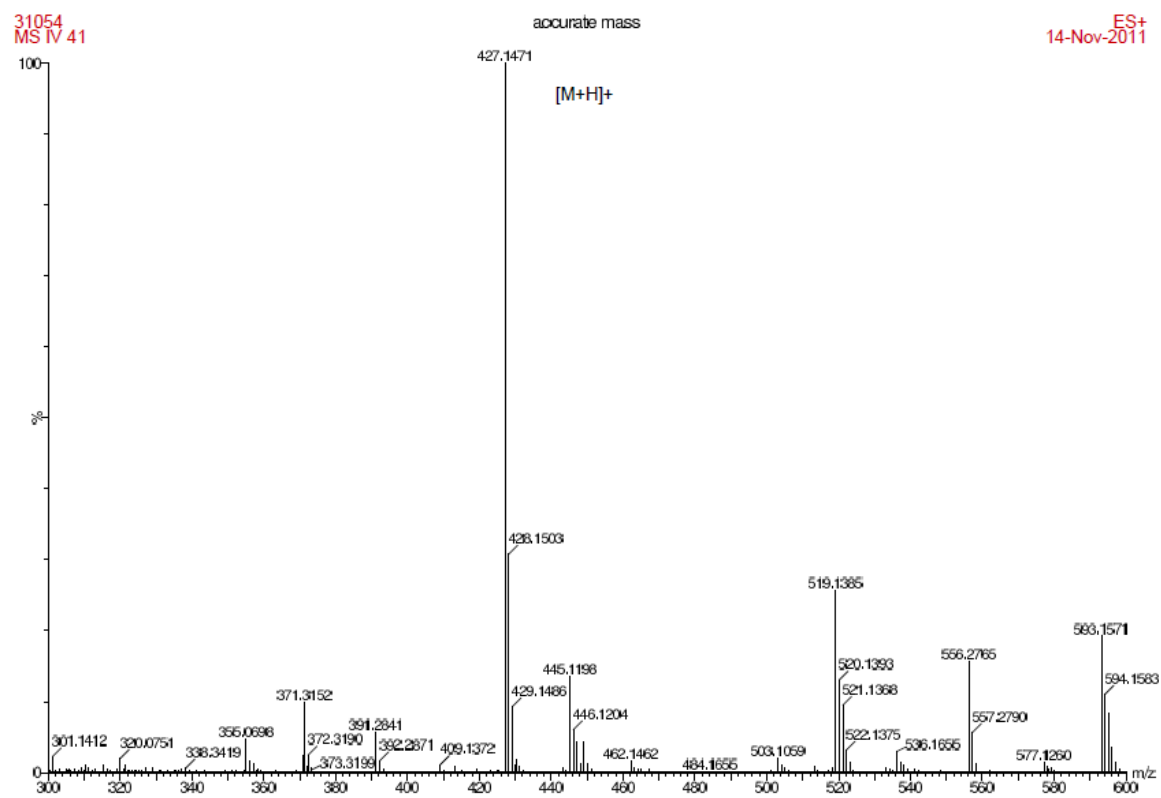

# <sup>1</sup>H NMR (500 MHz, DMSO)

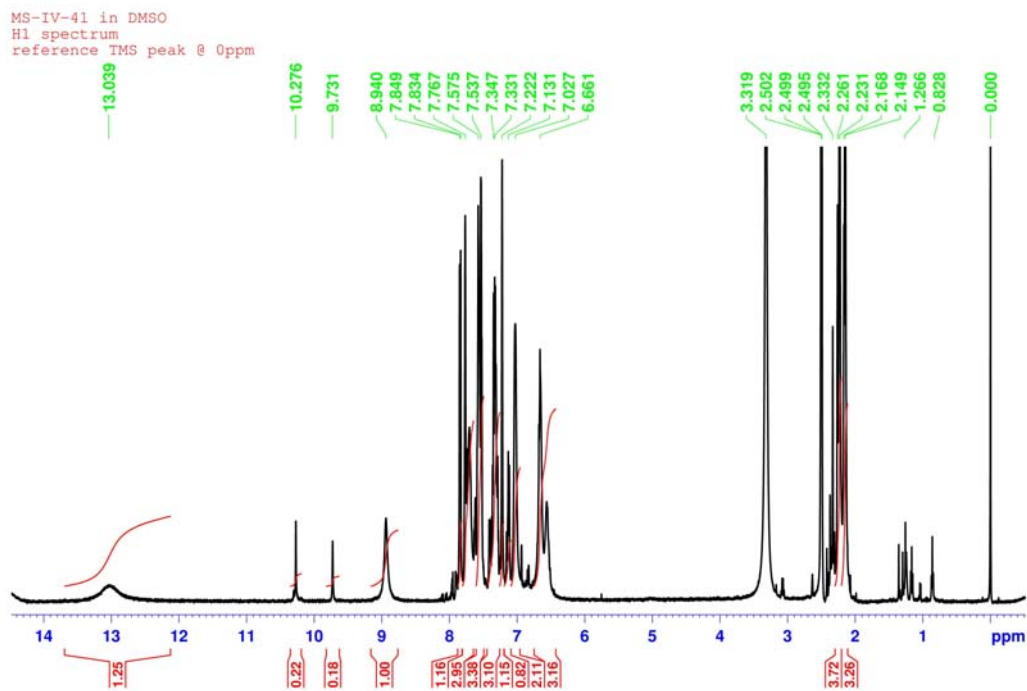

# <sup>13</sup>C NMR (150 MHz, DMSO)

MS-IV-41-600 in DMSO  
<sup>13</sup>C

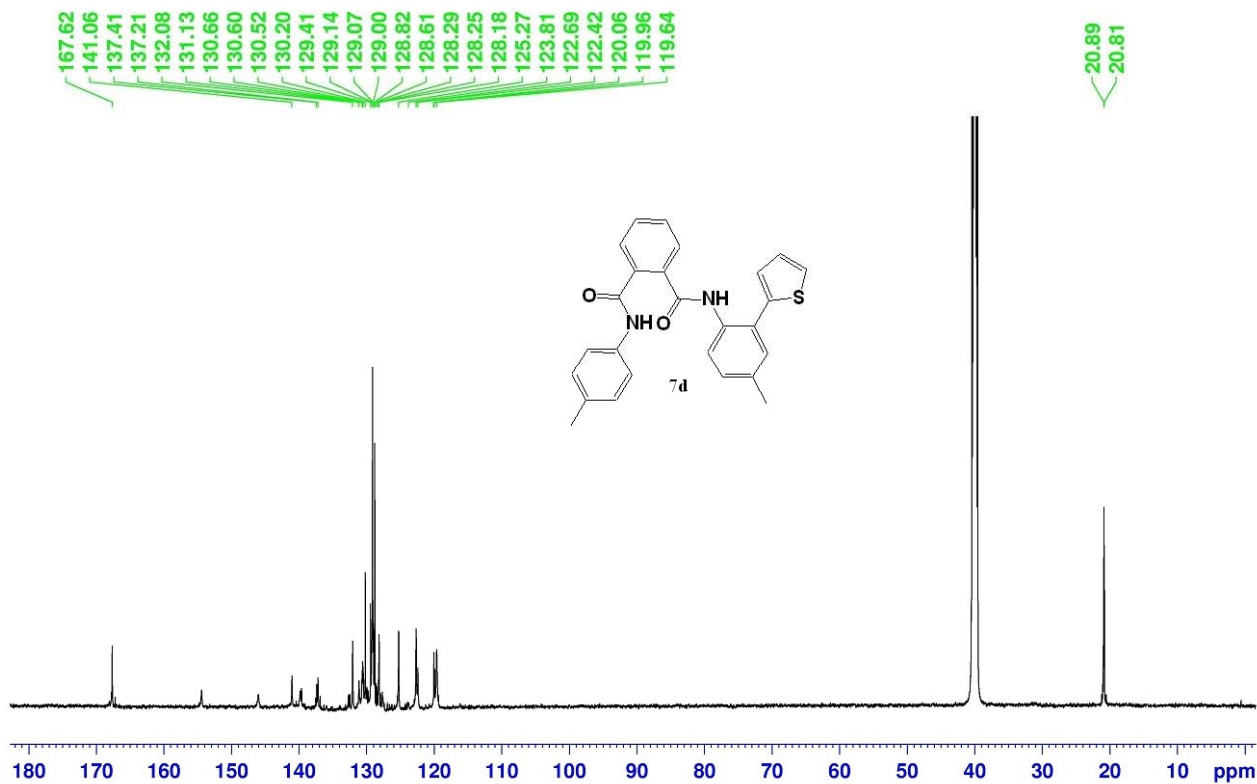

*N*<sup>1</sup>-(4-methyl-2-(5-methylthiophen-2-yl)phenyl)-*N*<sup>2</sup>-(*p*-tolyl)phthalamide (7e)

HRMS

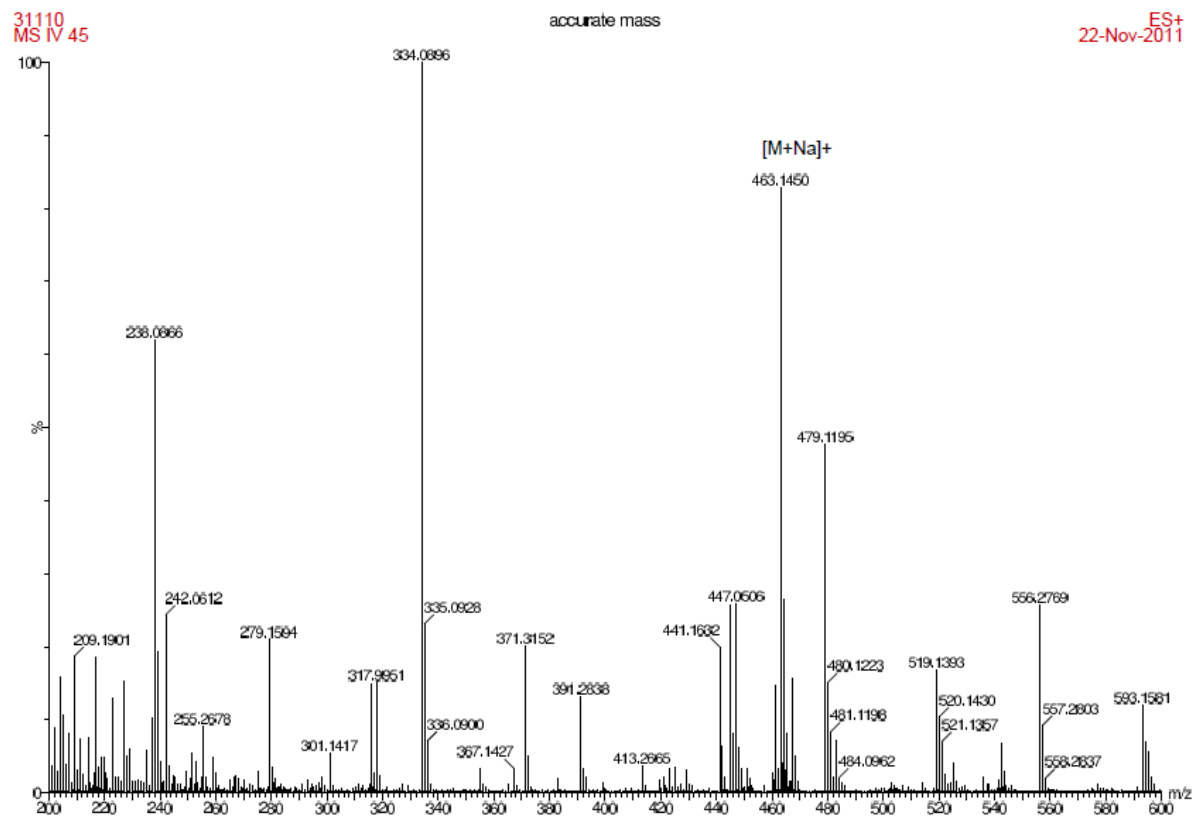

<sup>1</sup>H NMR (500 MHz, DMSO)

MS-IV-45-600 in DMSO  
proton spectrum  
temp=25C

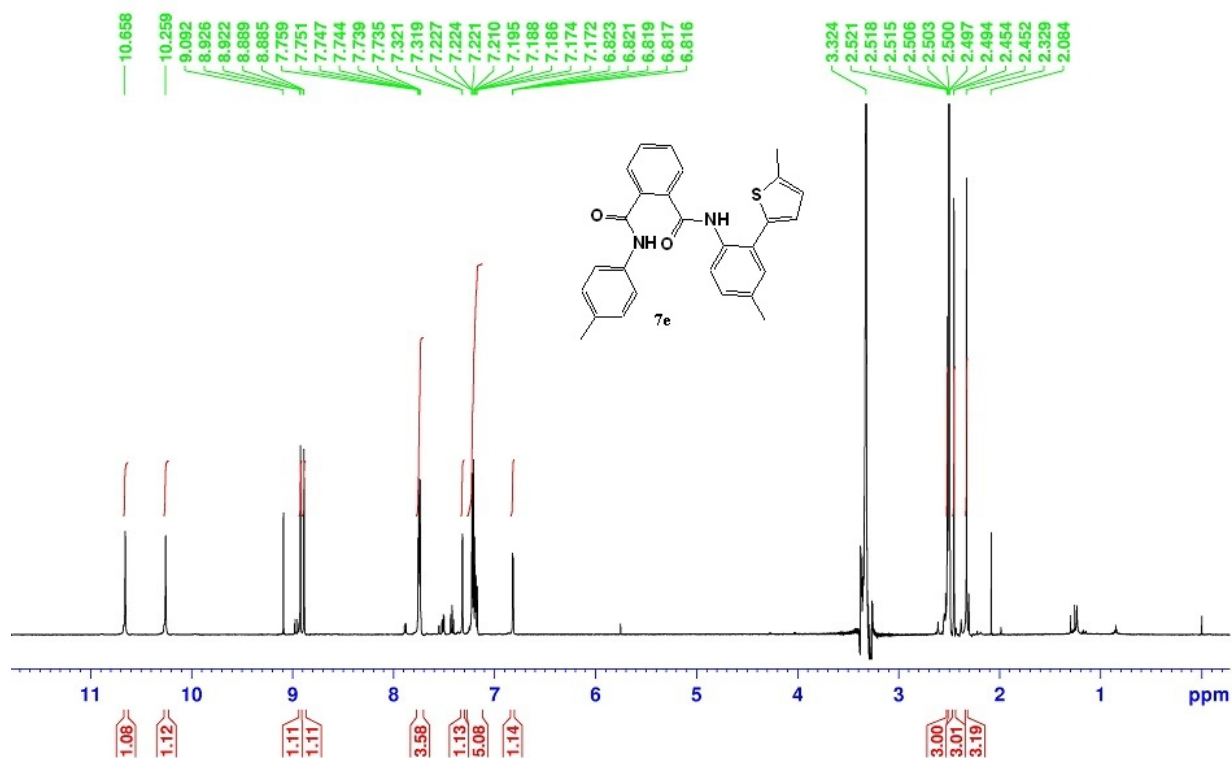

# $^{13}\text{C}$ NMR (125 MHz, DMSO)

MS-IV-45-600 in DMSO  
 $^{13}\text{C}$

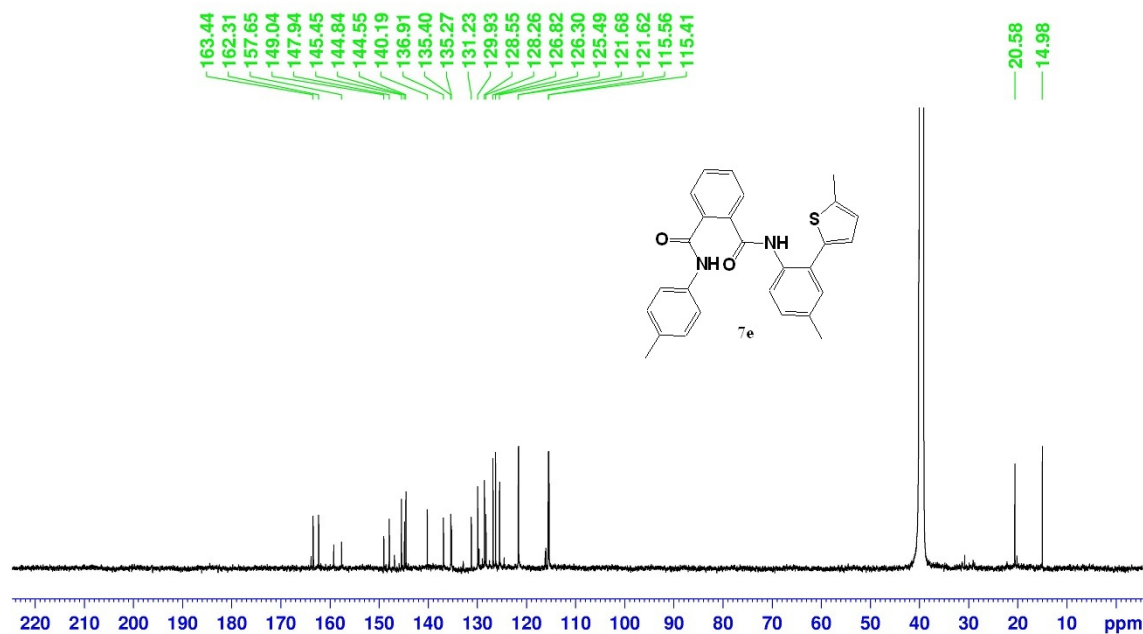

## $N^1$ -(4-fluorophenyl)- $N^2$ -(4-methyl-2-(5-methylthiophen-2-yl)phenyl)phthalamide (**7f**)

### HRMS

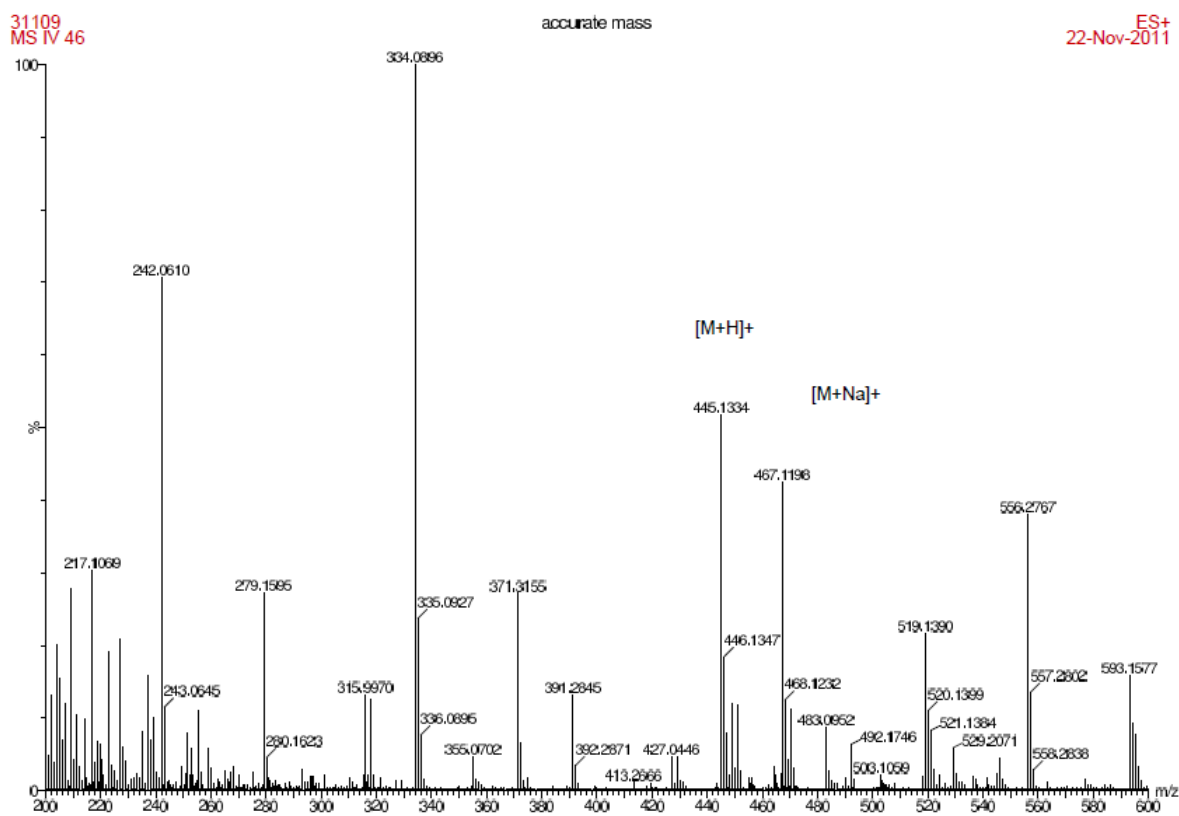



# <sup>1</sup>H NMR (500 MHz, DMSO)

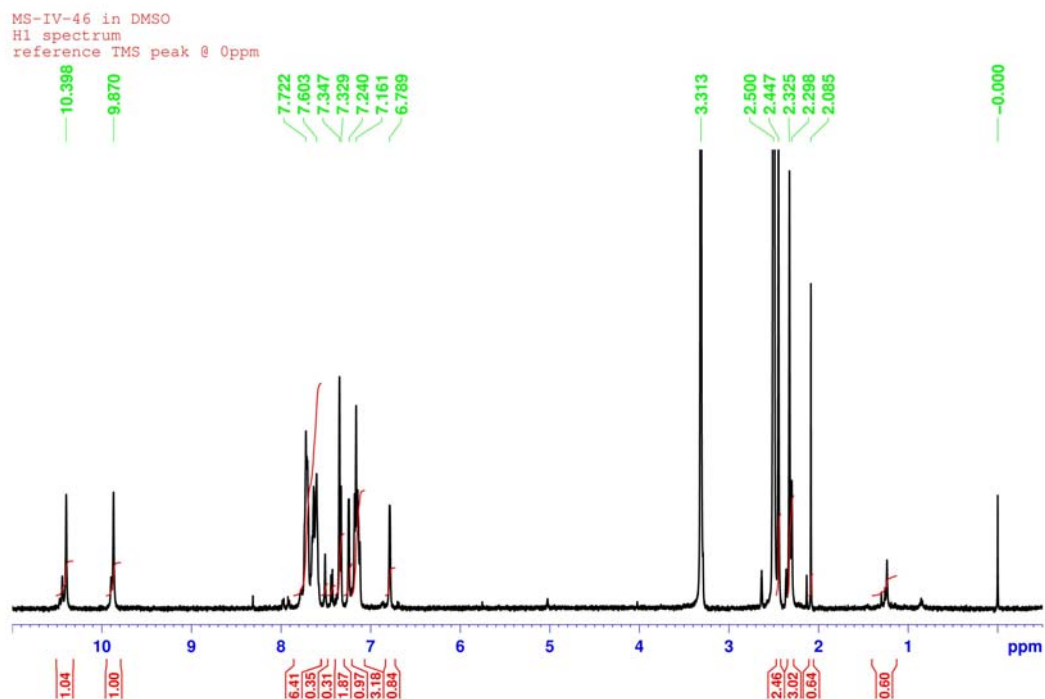

# <sup>13</sup>C NMR (150 MHz, DMSO)

MS-IV-46-600 in DMSO  
<sup>13</sup>C  
<sup>1</sup>H decoupled

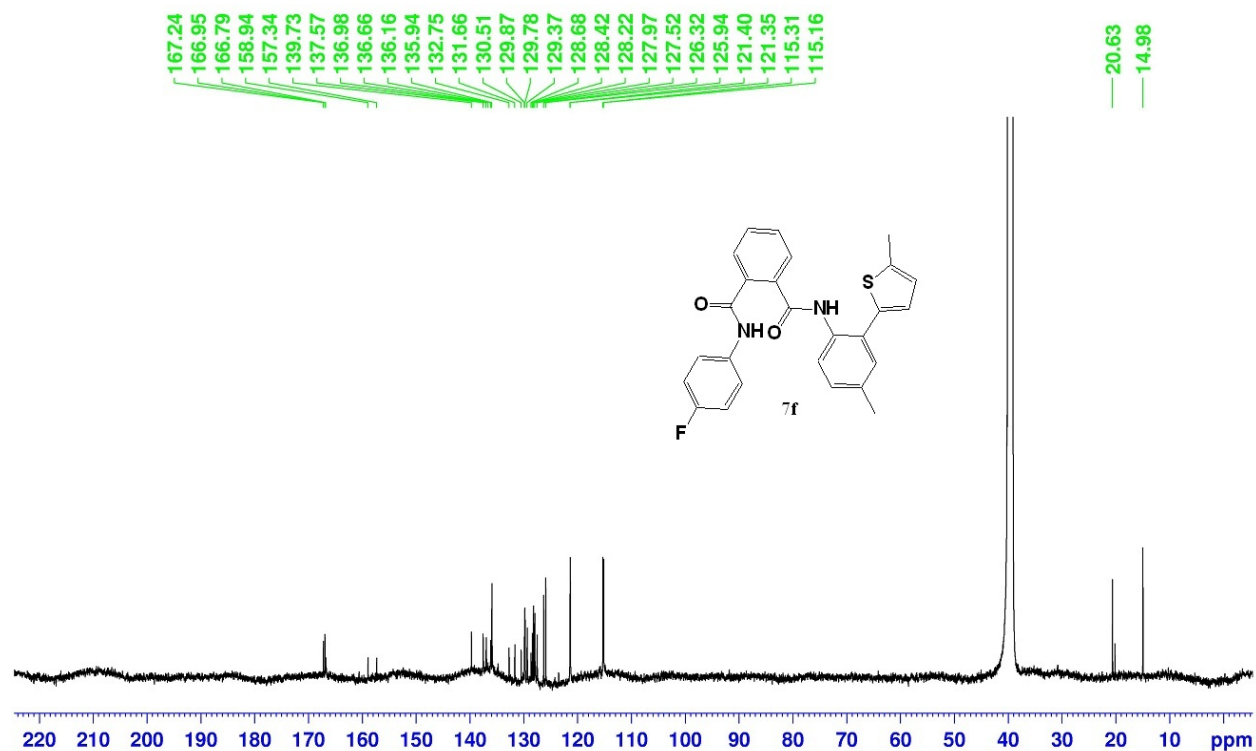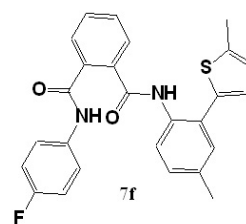



*N*<sup>1</sup>-(4-methyl-2-(thiophen-3-yl)phenyl)-*N*<sup>2</sup>-(*p*-tolyl)phthalamide (7g)

HRMS

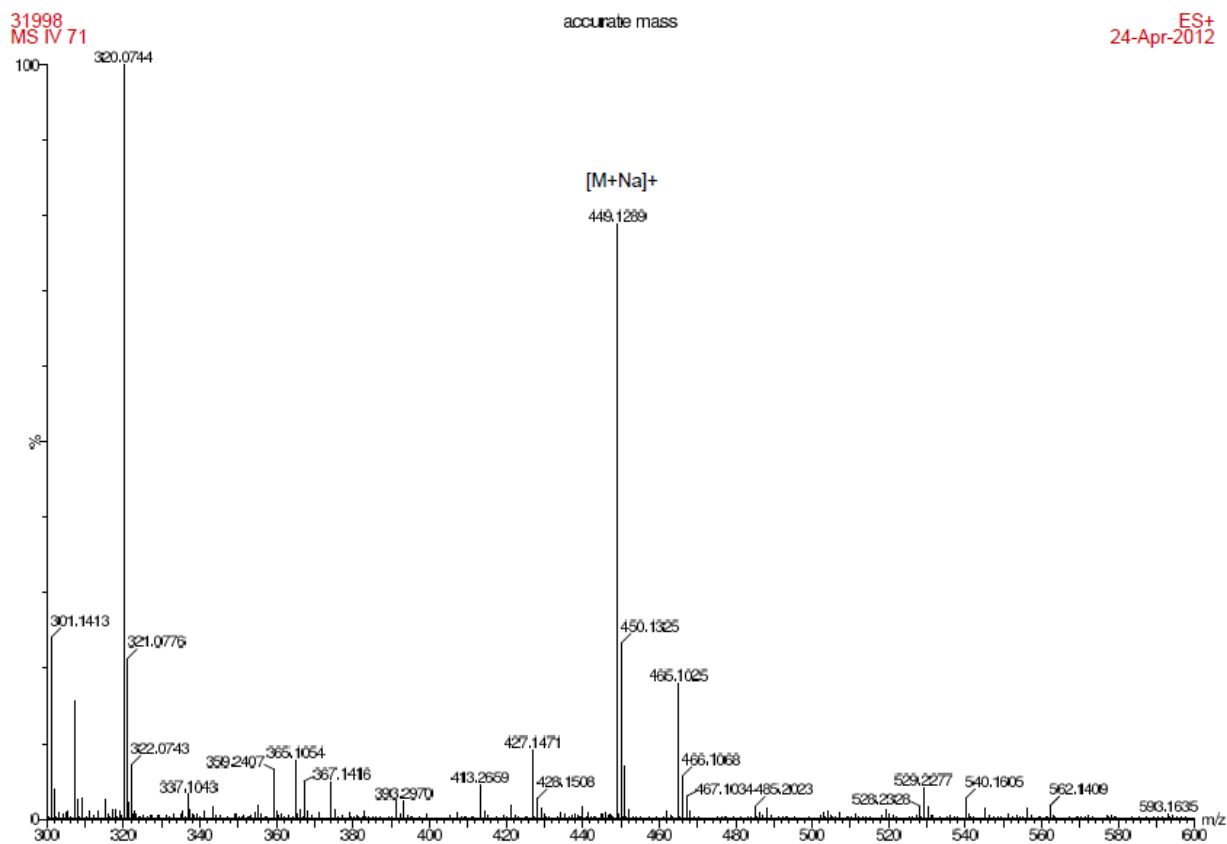

<sup>1</sup>H NMR (500 MHz, CDCl<sub>3</sub>)

MS-IV-71 in CDCl<sub>3</sub>  
proton spectrum  
temp=25C

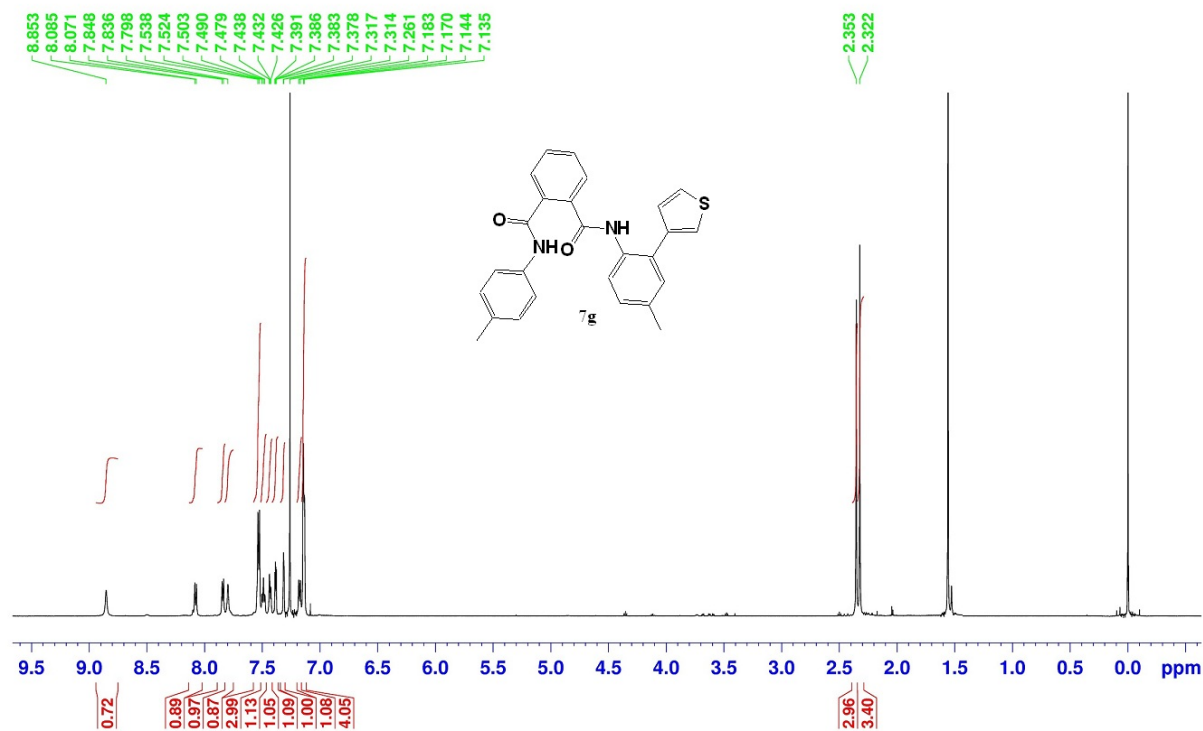

# $^{13}\text{C}$ NMR (125 MHz, $\text{CDCl}_3$ )

MS-IV-71 in  $\text{CDCl}_3$   
temp = 20C  
 $^{13}\text{C}$

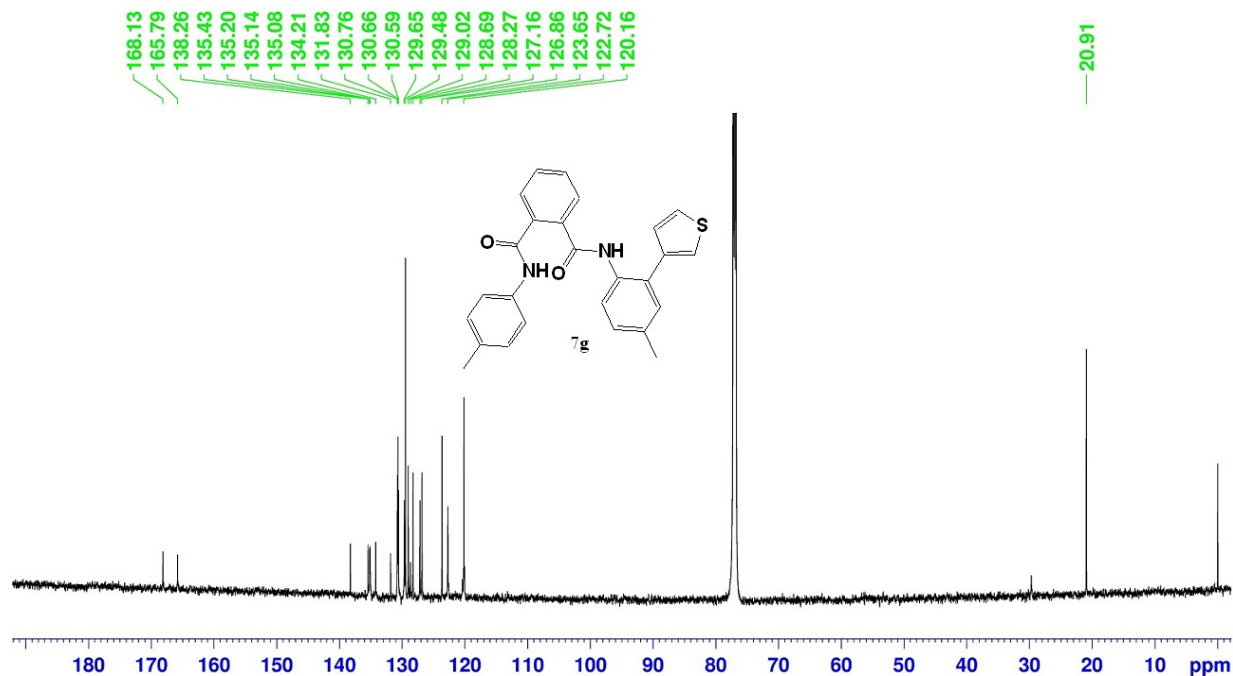

## $N^1$ -(4-fluorophenyl)- $N^2$ -(4-methyl-2-(thiophen-3-yl)phenyl)phthalamide (7h)

### HRMS

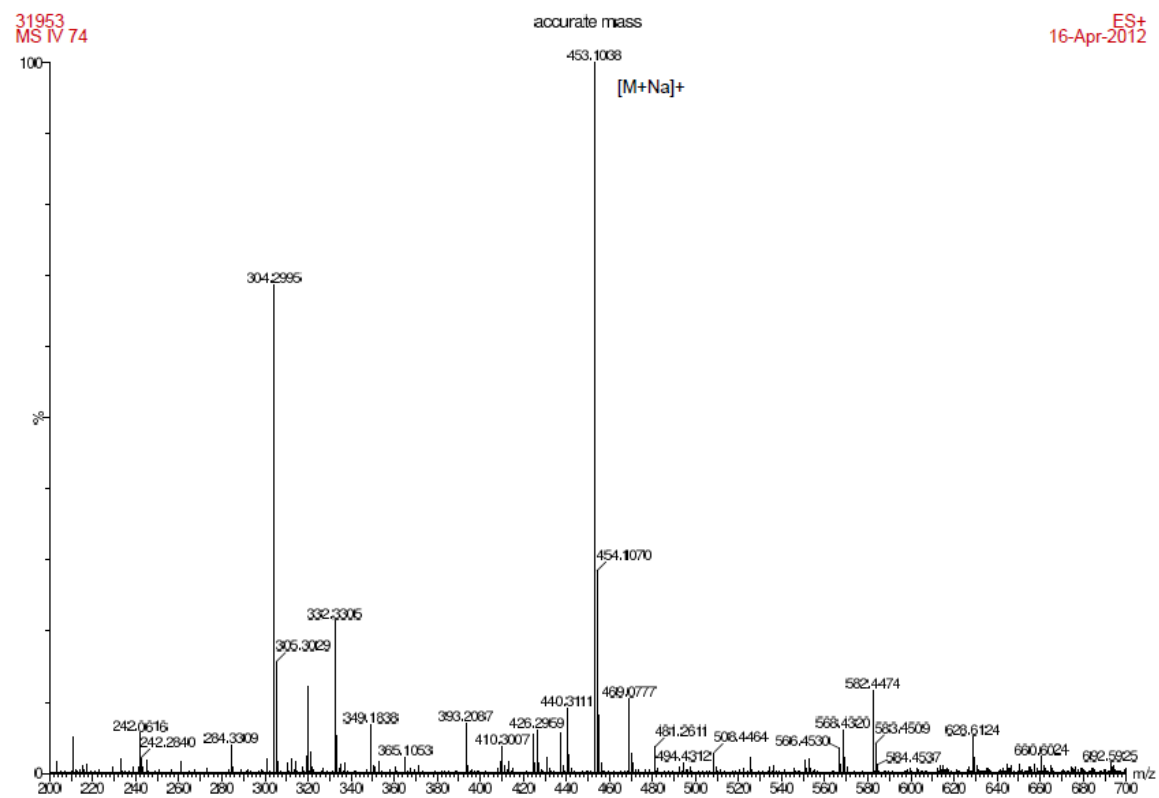

# $^1\text{H}$ NMR (500 MHz, $\text{CDCl}_3$ )

MS-IV-74 in  $\text{CDCl}_3$   
proton spectrum  
temp=25C

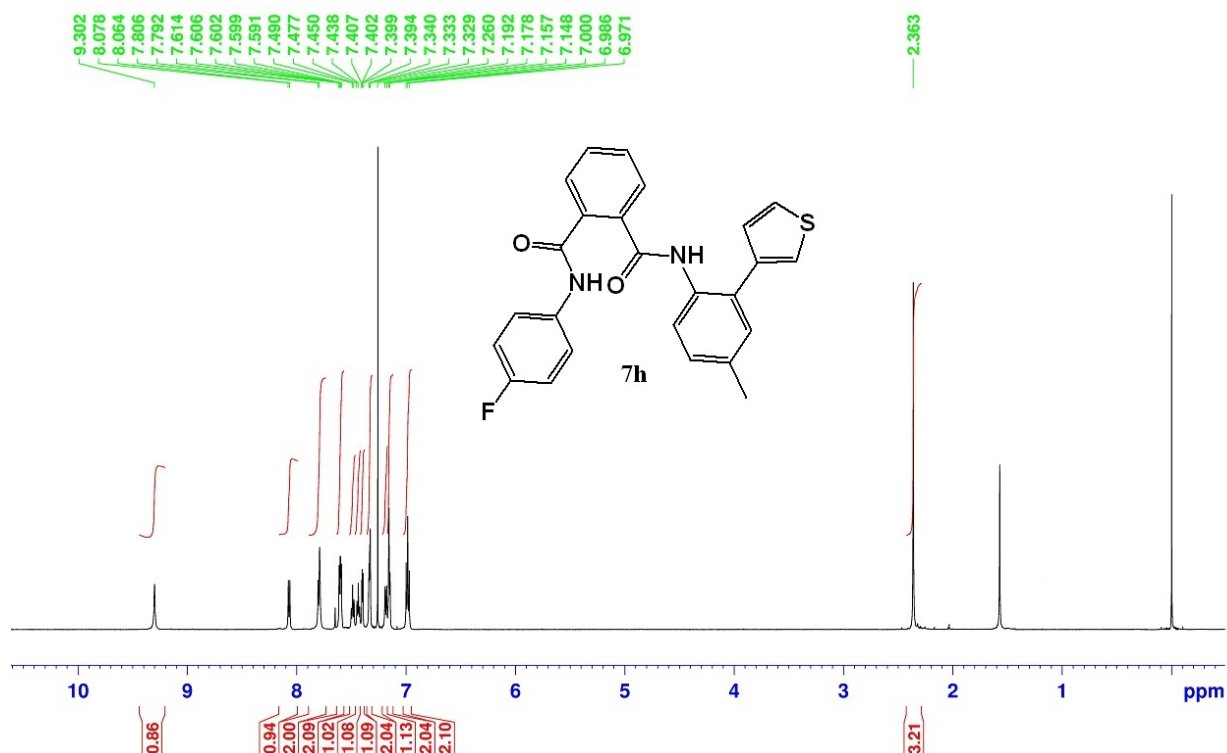

# $^{13}\text{C}$ NMR (125 MHz, $\text{CDCl}_3$ )

MS-IV-74 in  $\text{CDCl}_3$   
temp = 25C  
 $^{13}\text{C}$   
 $^1\text{H}$  decoupled

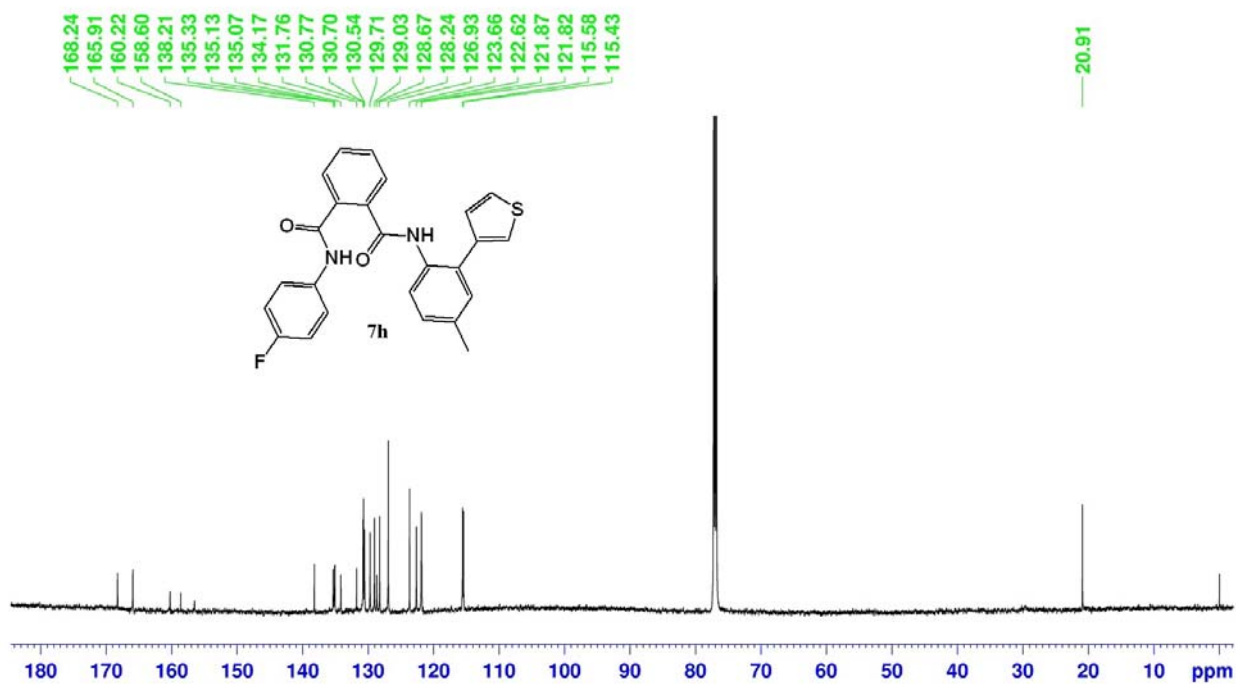

$N^1$ -(4-fluorophenyl)- $N^2$ -(2-(thiophen-3-yl)benzyl)phthalamide (7i)

HRMS

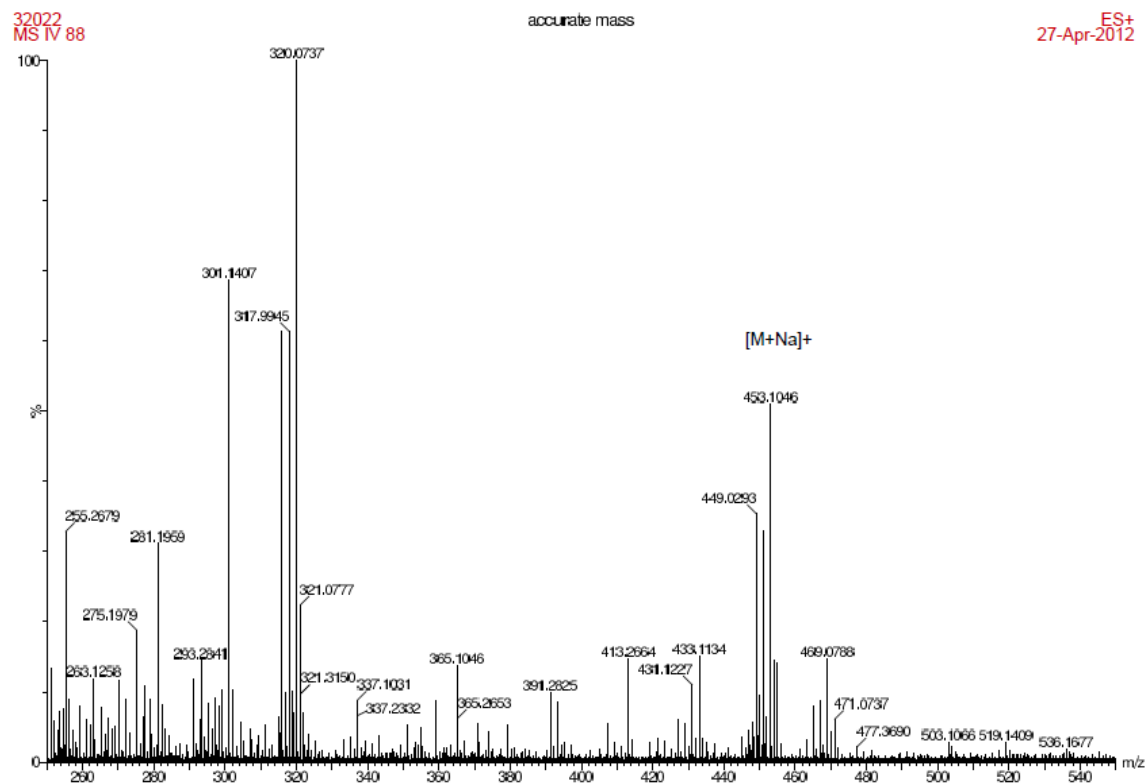

$^1\text{H}$  NMR (500 MHz, DMSO)

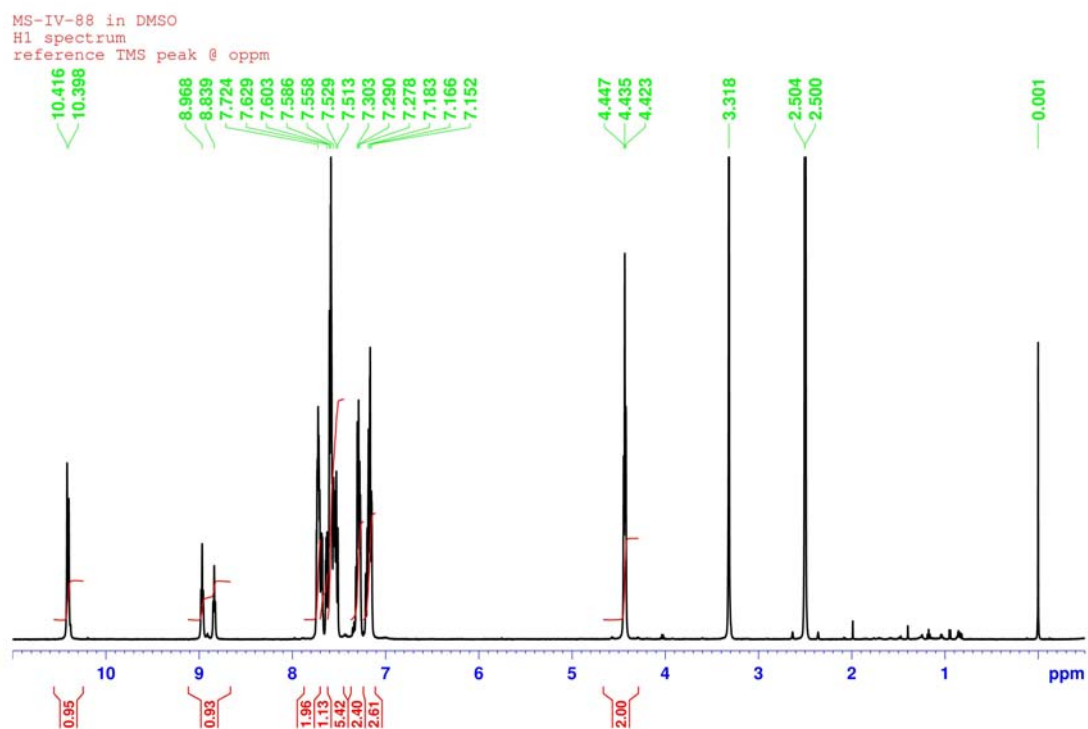

$^{13}\text{C}$  NMR (75 MHz, DMSO)

MS-IV-88 in DMSO  
C13 spectrum

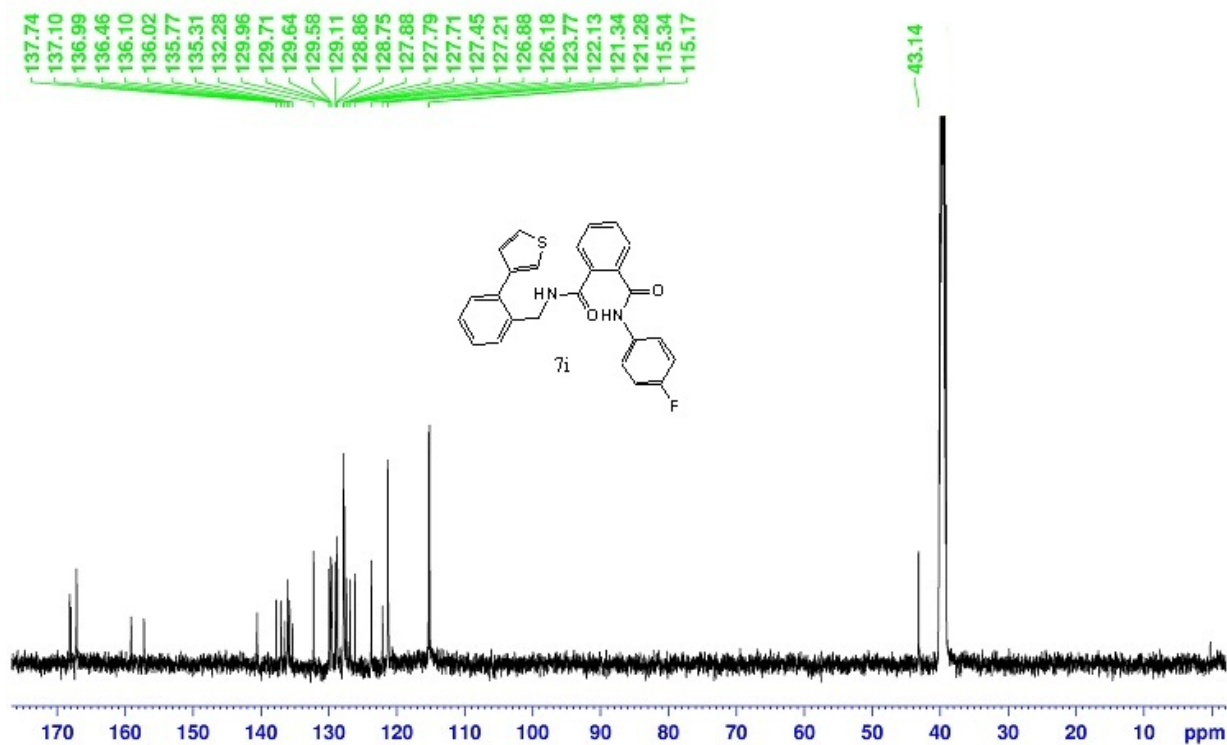

$N^1$ -(2-(thiophen-3-yl)benzyl)- $N^2$ -(p-tolyl)phthalamide (7j)

HRMS

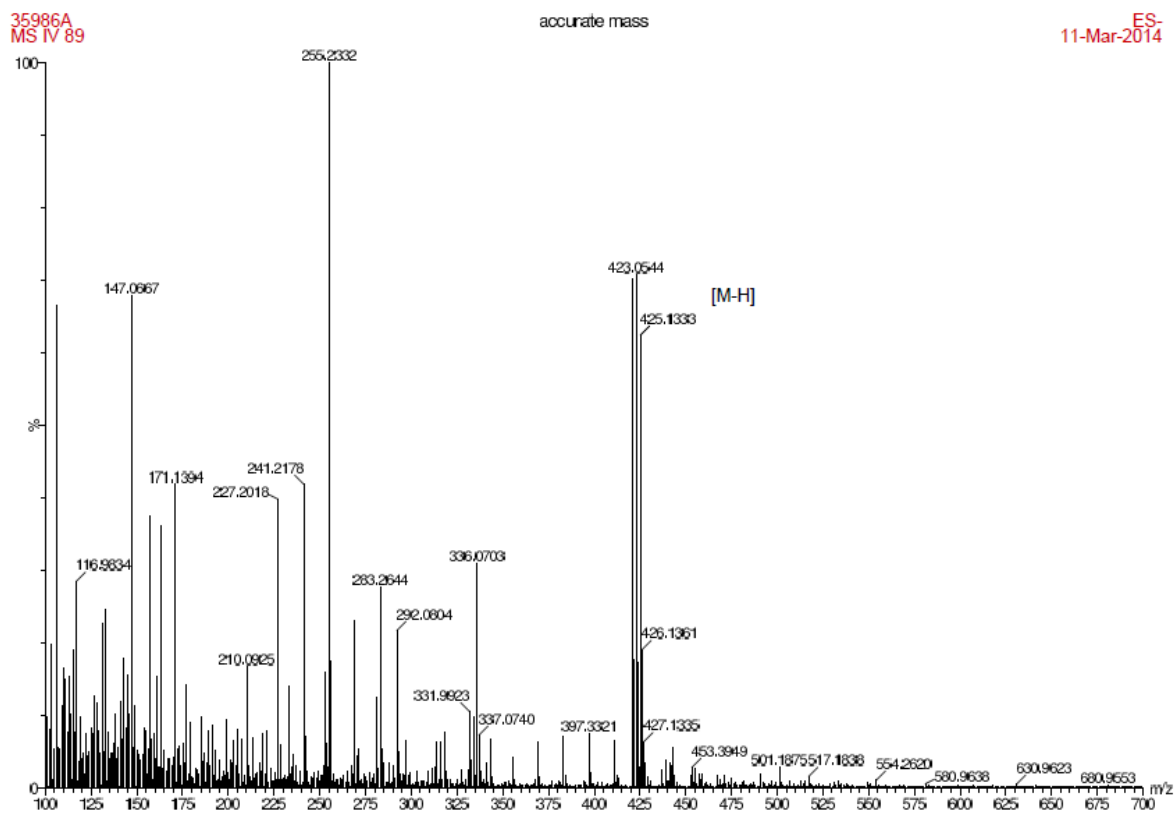

# <sup>1</sup>H NMR (300 MHz, DMSO)

MS-IV-89 in DMSO  
27/04/2012

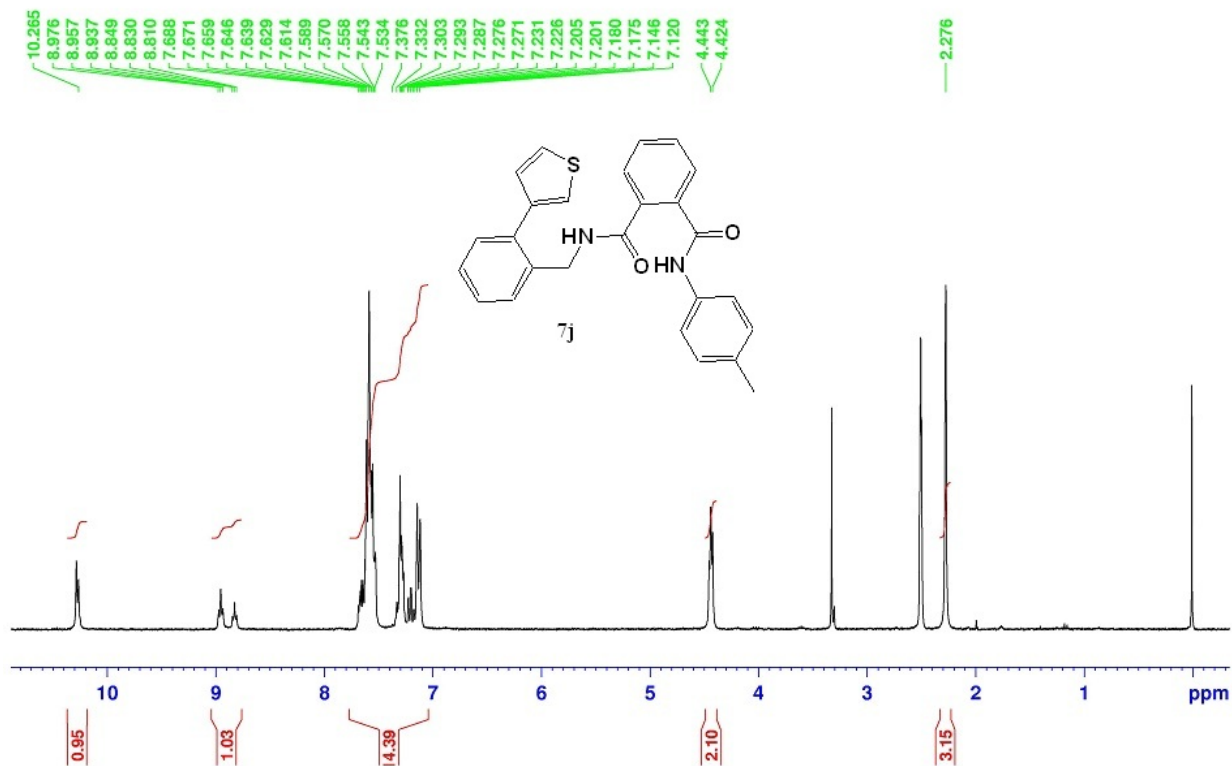

# <sup>13</sup>C NMR (75 MHz, DMSO)

MS-IV-89 C13 in DMSO  
27/04/2012

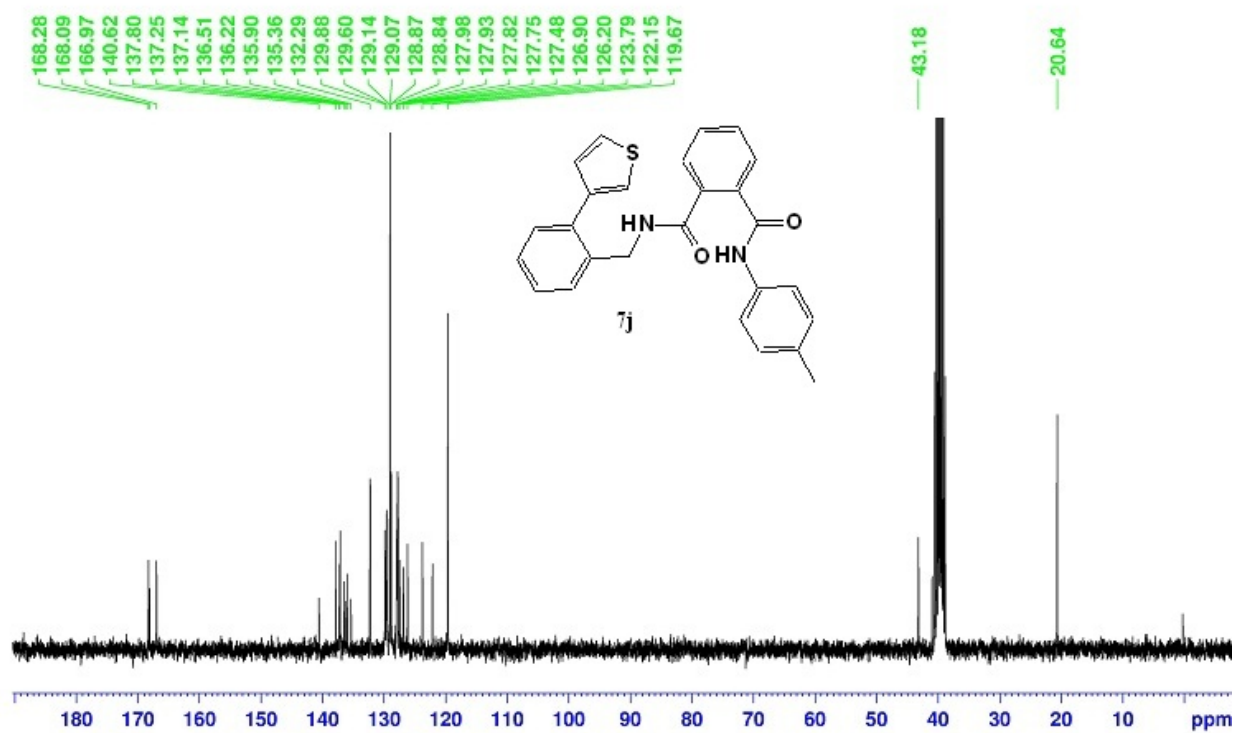

$N^1$ -(4-fluorophenyl)- $N^2$ -(4-(thiophen-3-yl)benzyl)phthalamide (7k)

HRMS

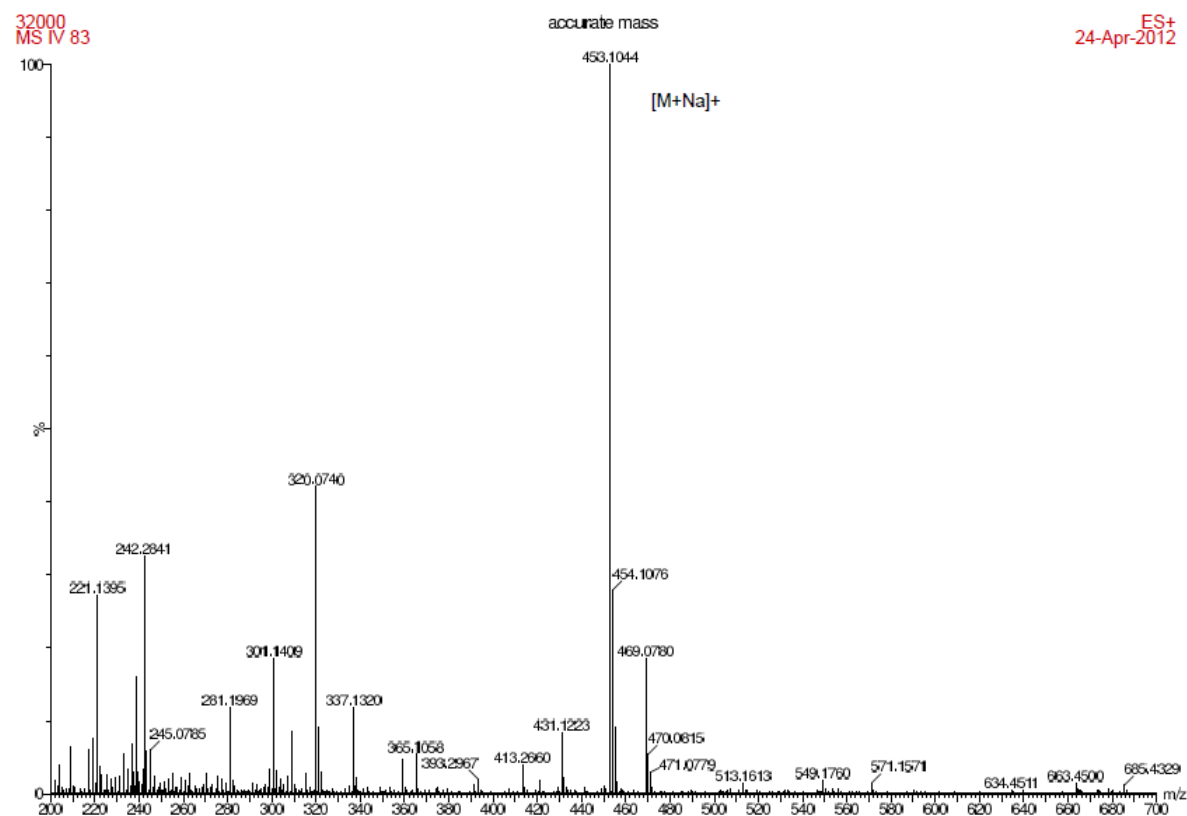

$^1\text{H}$  NMR (500 MHz, DMSO)

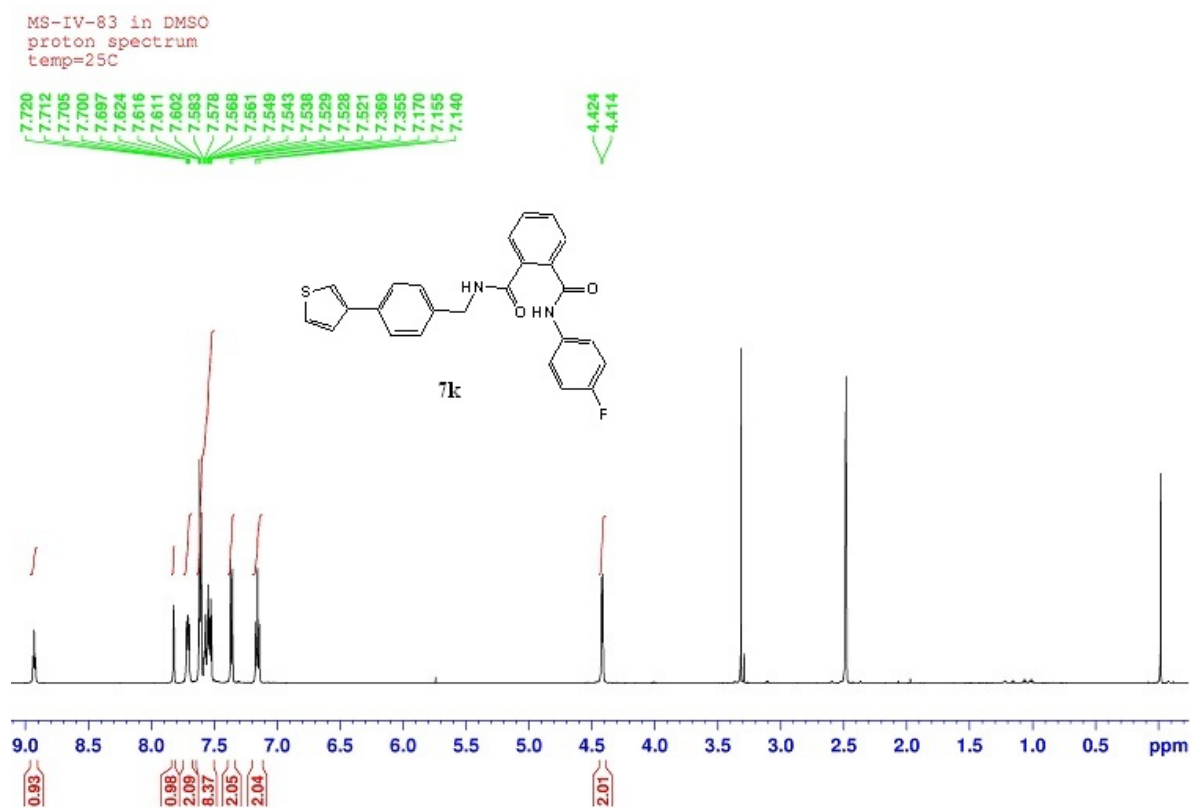

$^{13}\text{C}$  NMR (125 MHz, DMSO)

MS-IV-83 in DMSO  
temp = 25C  
 $^{13}\text{C}$   
 $^1\text{H}$  decoupled

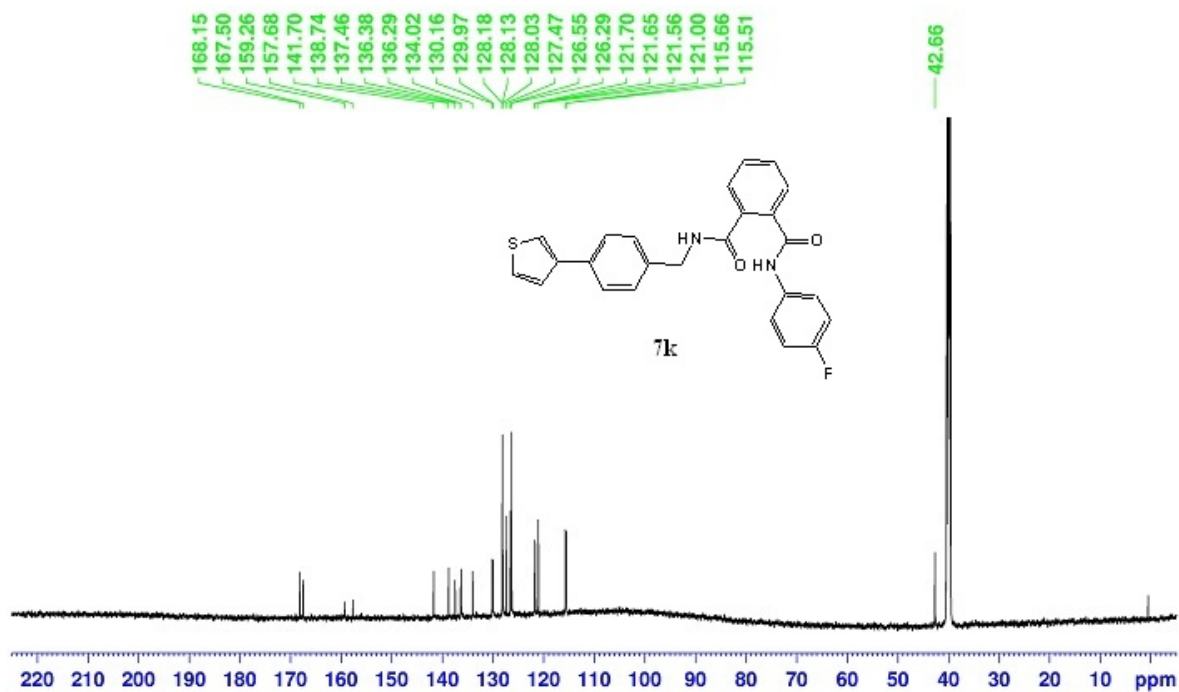

$N^1$ -(4-(thiophen-3-yl)benzyl)- $N^2$ -(p-tolyl)phthalamide (**7l**):

HRMS

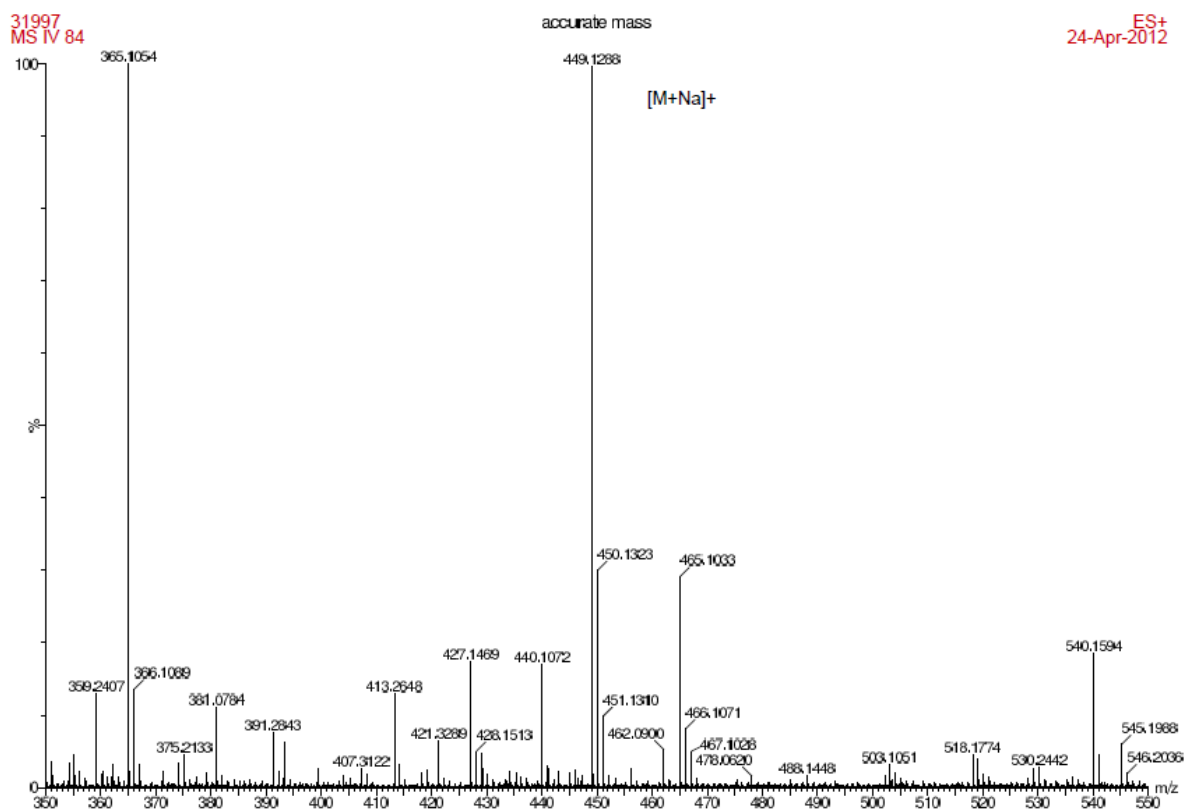



# <sup>1</sup>H NMR (300 MHz, DMSO)

MS-IV-84 in DMSO  
24/04/2012

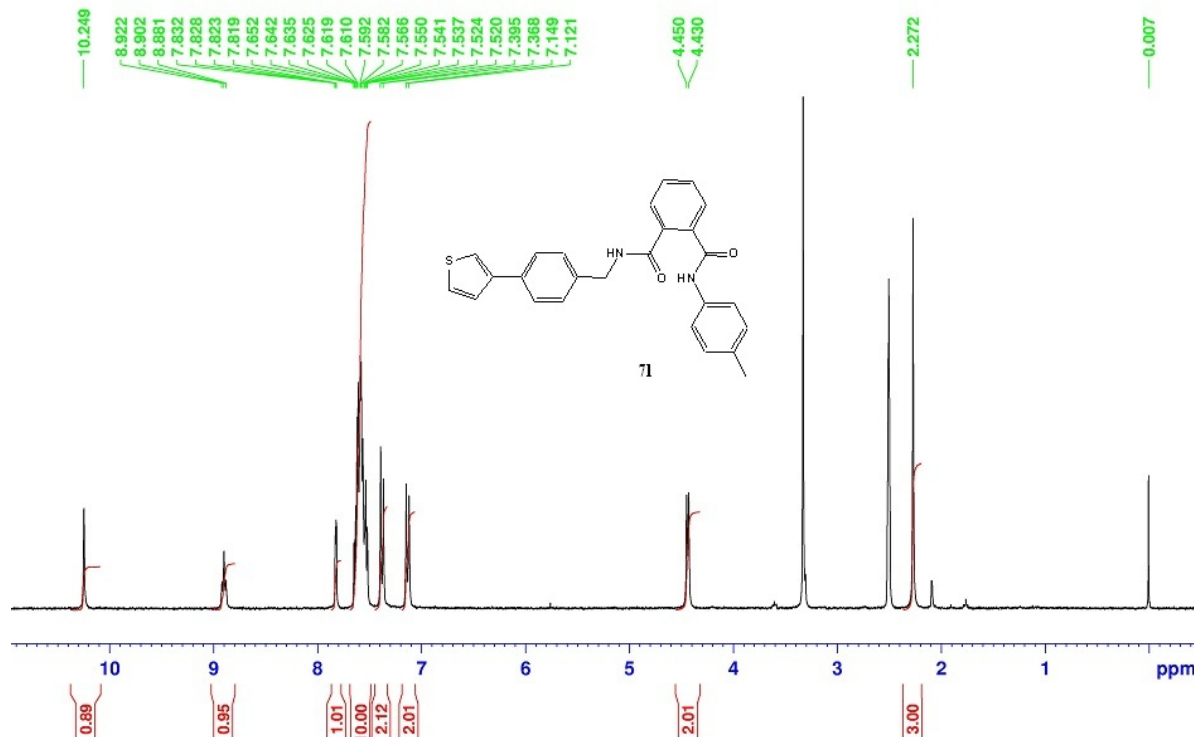

# <sup>13</sup>C NMR (75 MHz, DMSO)

MS-IV-84 C13 in DMSO  
24/04/2012

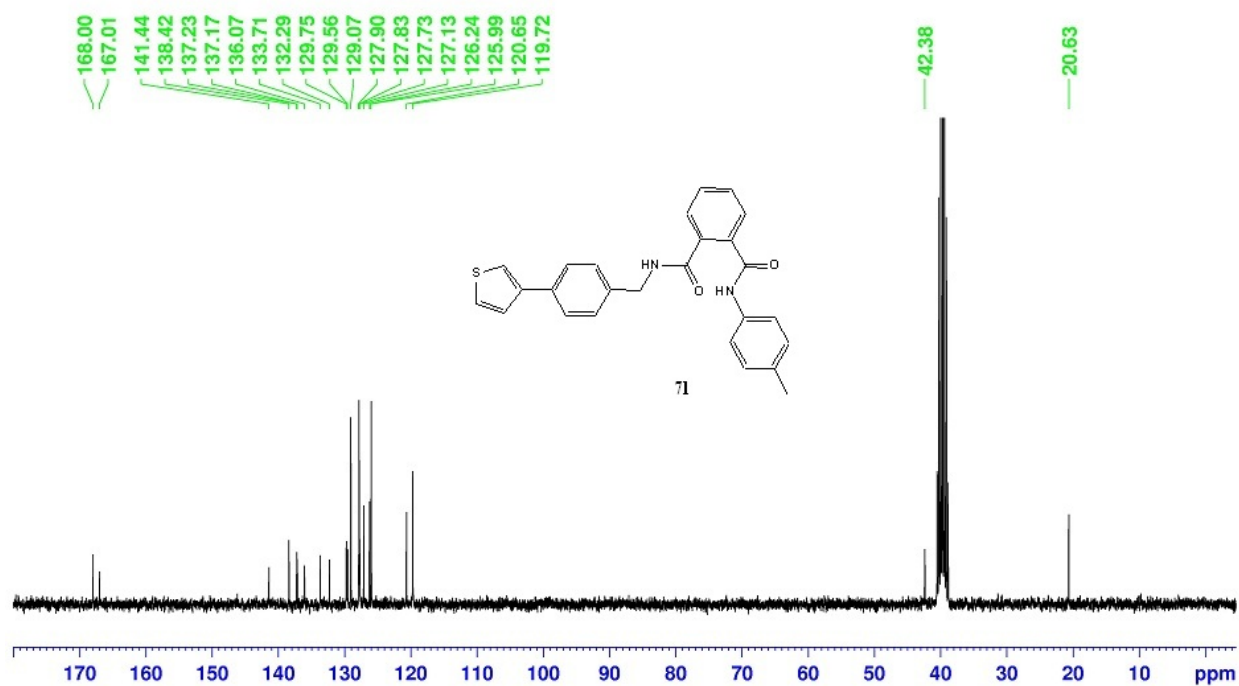

$N^1$ -(4-fluorophenyl)- $N^2$ -(2-(3-methyl-1H-pyrazol-5-yl)phenyl)phthalamide (7m):

HRMS

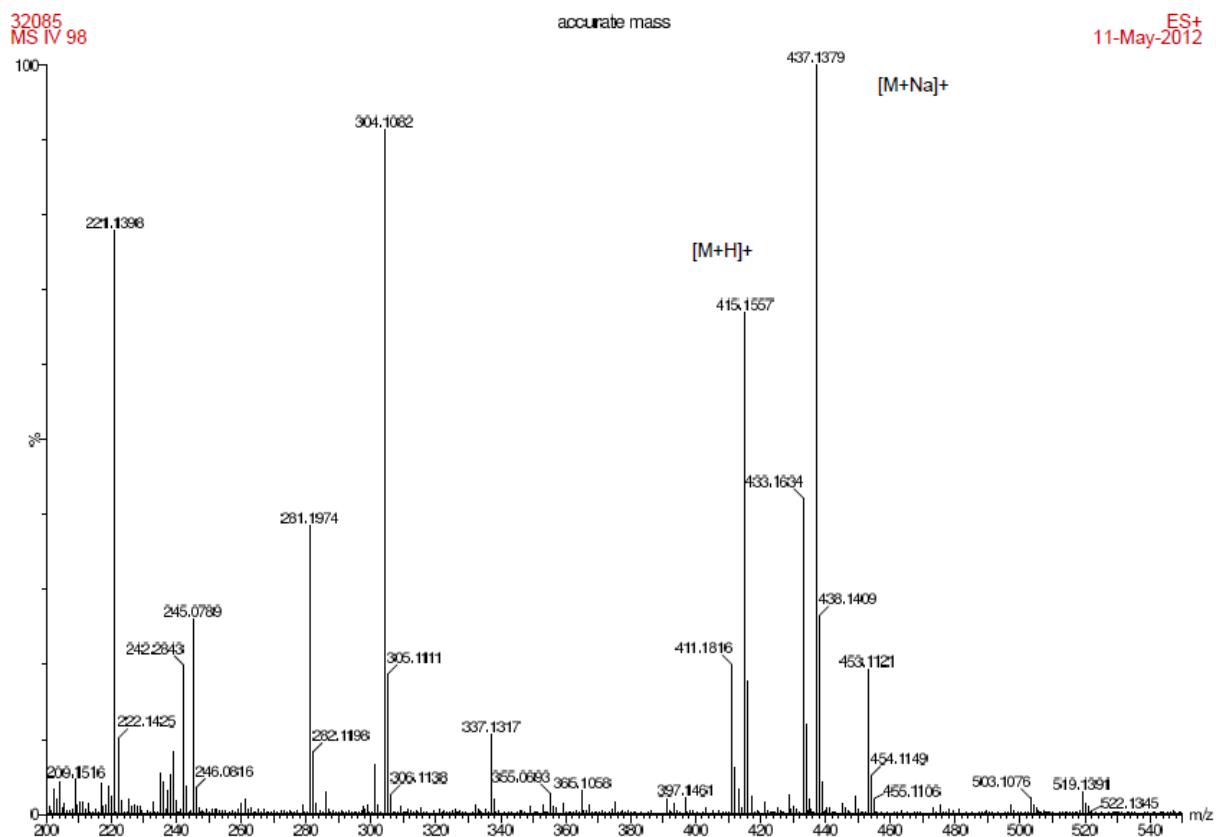

$^1\text{H}$  NMR (500 MHz, DMSO)

MS-IV-98 in DMSO  
proton spectrum  
temp=25C

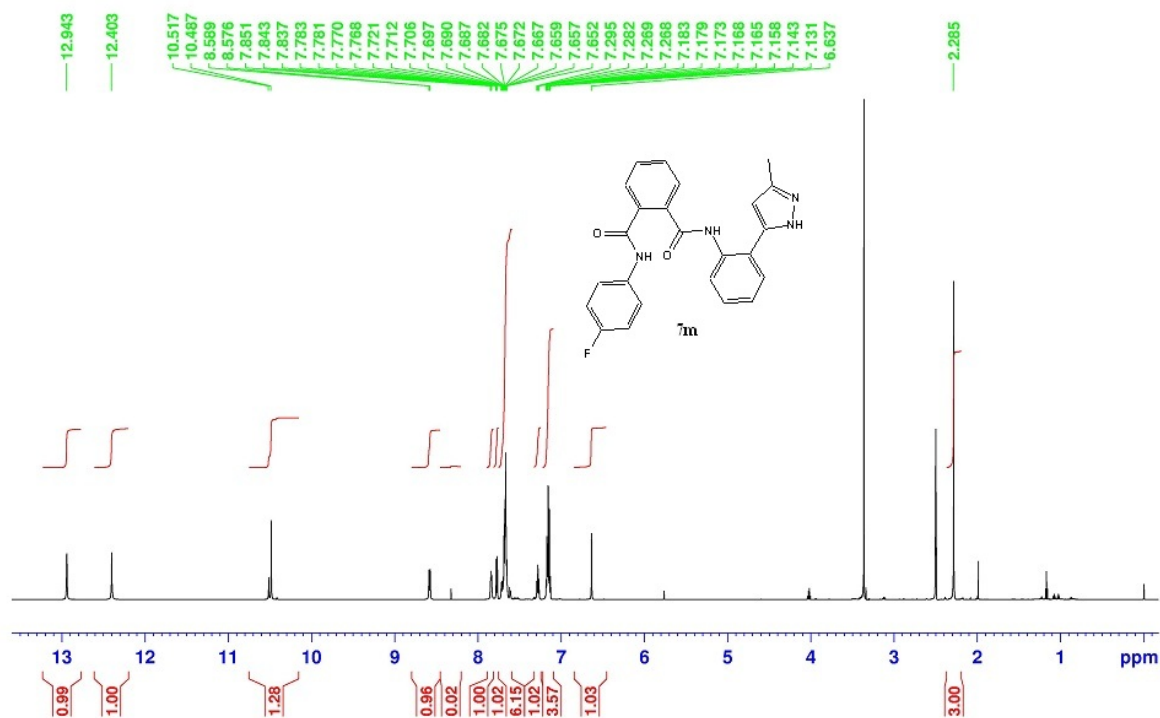

# $^{13}\text{C}$ NMR (125 MHz, DMSO)

MS-IV-98 in DMSO  
temp = 25C  
13C  
1H decoupled

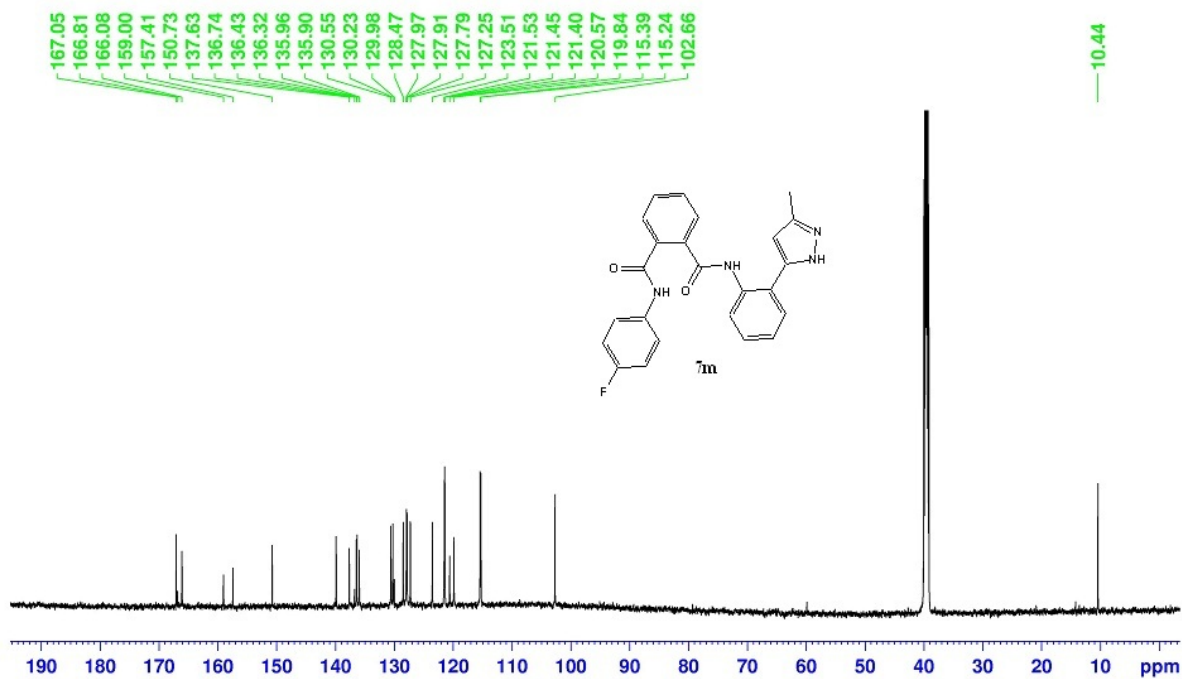

# $N^1$ -(2-(3-methyl-1H-pyrazol-5-yl)phenyl)- $N^2$ -(p-tolyl)phthalamide (7n)

## HRMS

32084  
MS IV 99

accurate mass

ES+  
11-May-2012

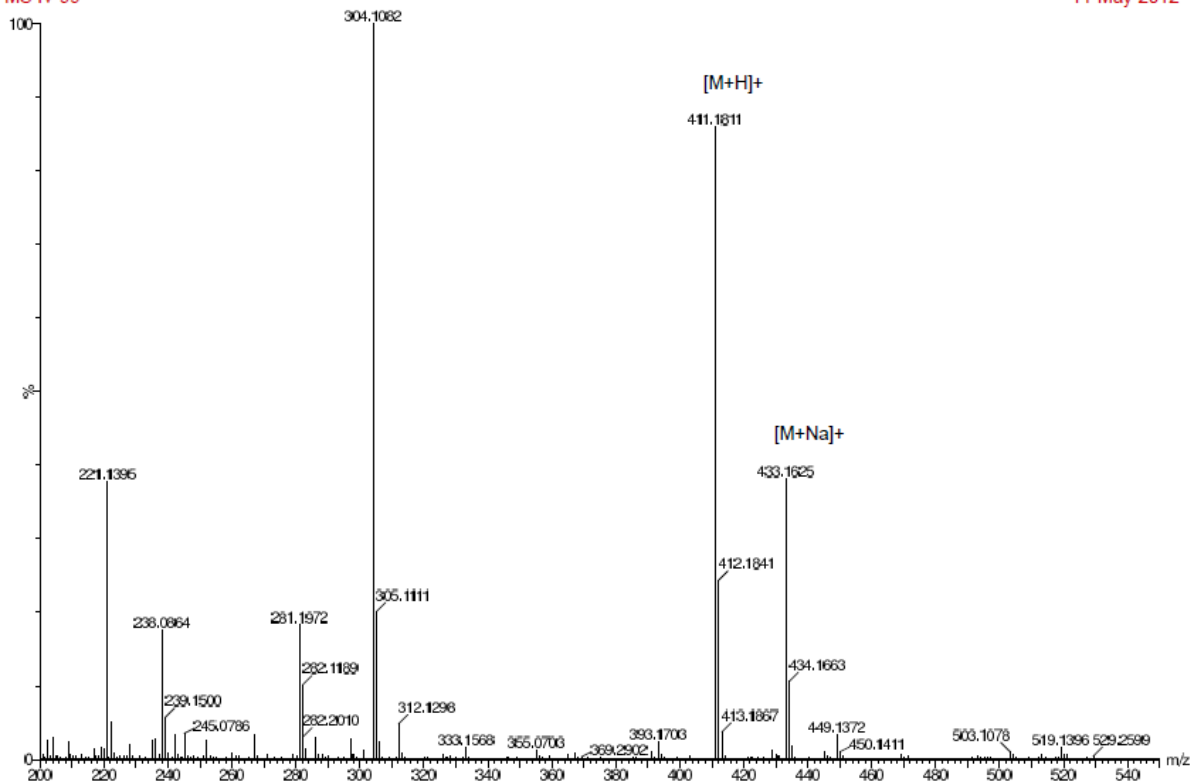

# <sup>1</sup>H NMR (500 MHz, DMSO)

MS-IV-99 in DMSO  
proton spectrum  
temp=25C

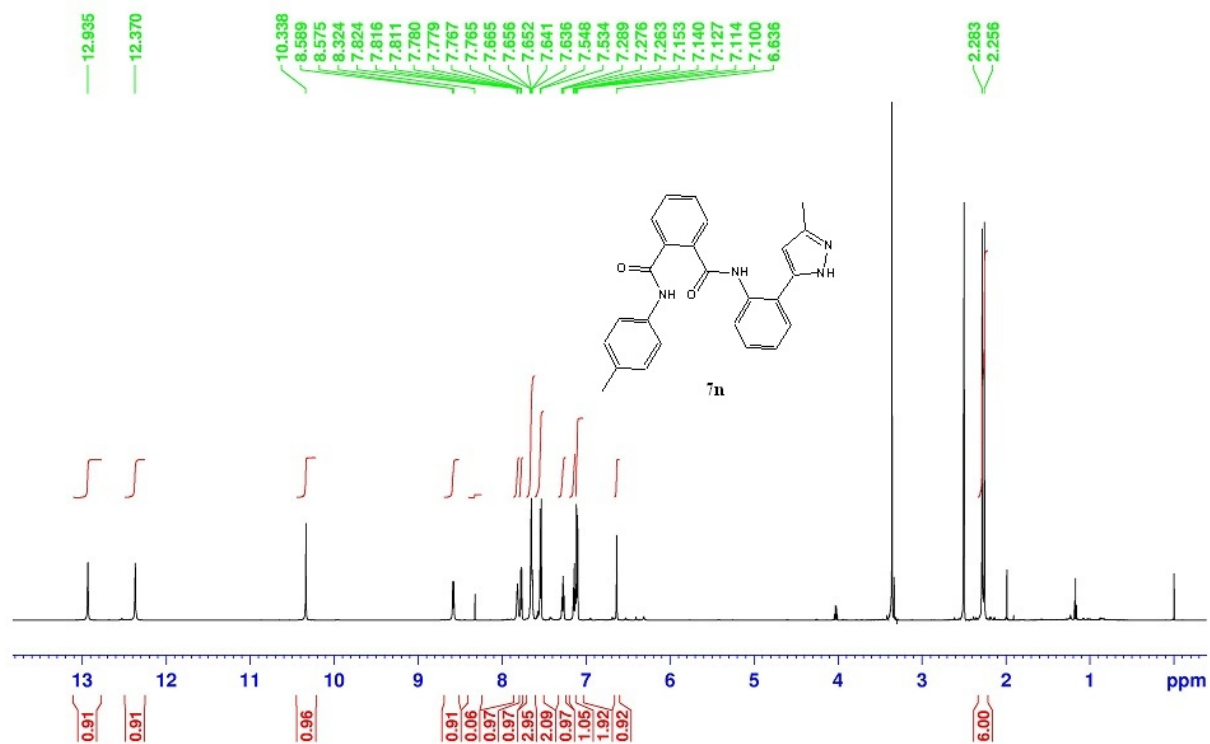

# <sup>13</sup>C NMR (125 MHz, DMSO)

MS-IV-99 in DMSO  
temp = 25C  
<sup>13</sup>C  
<sup>1</sup>H decoupled

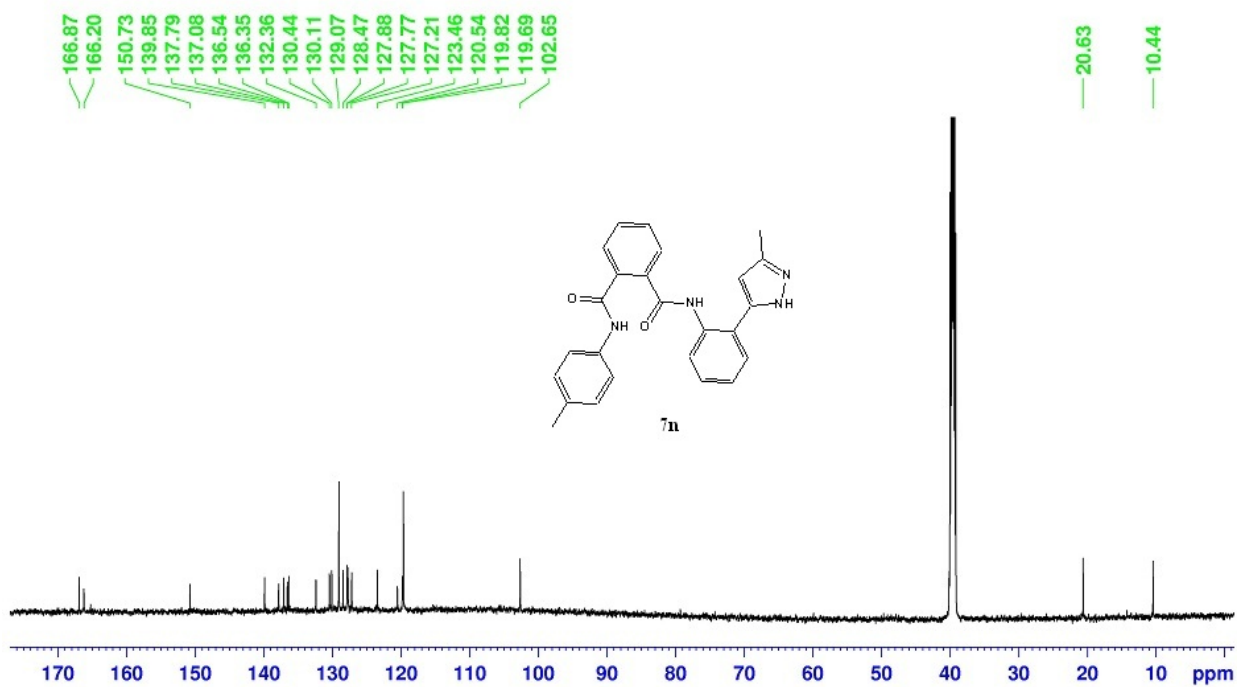

# 2-(1,3-dioxoisindolin-2-yl)benzoic acid (9)

HRMS

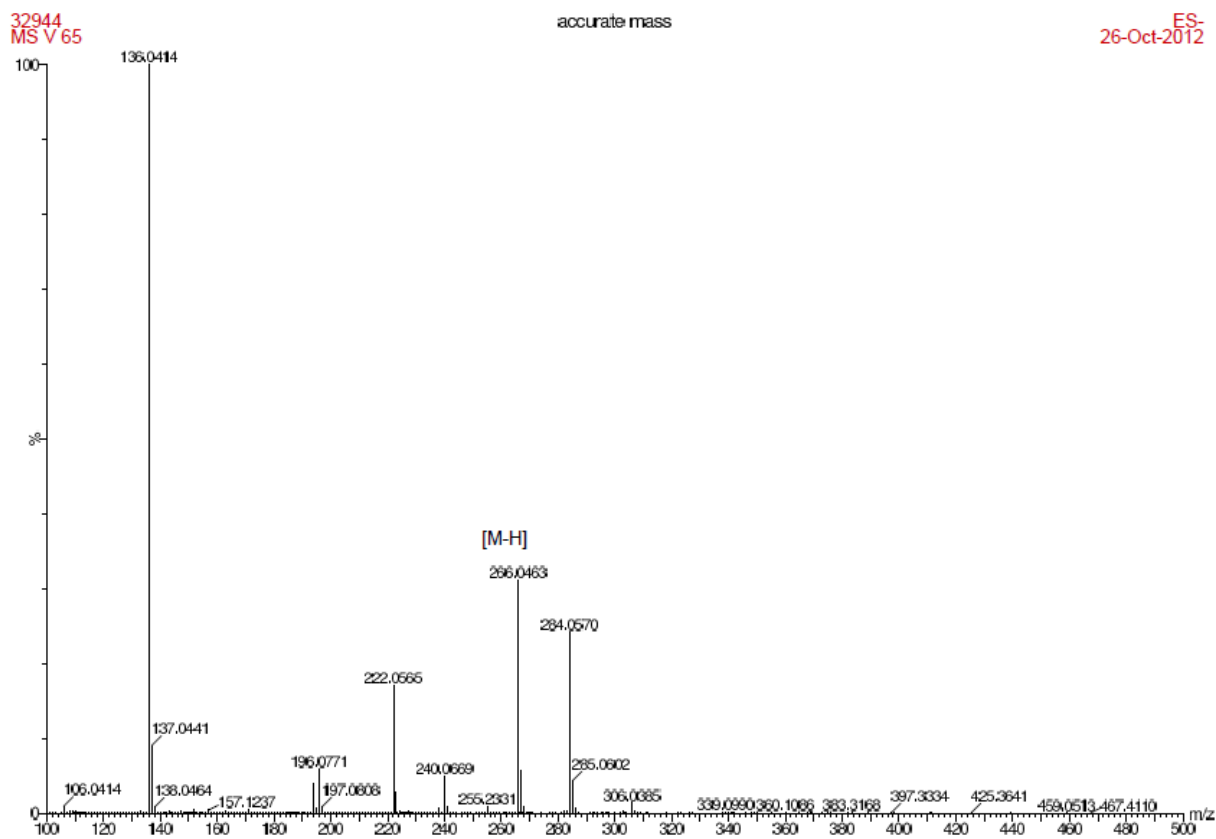

$^1\text{H NMR}$  (300 MHz, DMSO)

MS-V-64 in DMSO  
26/10/2012

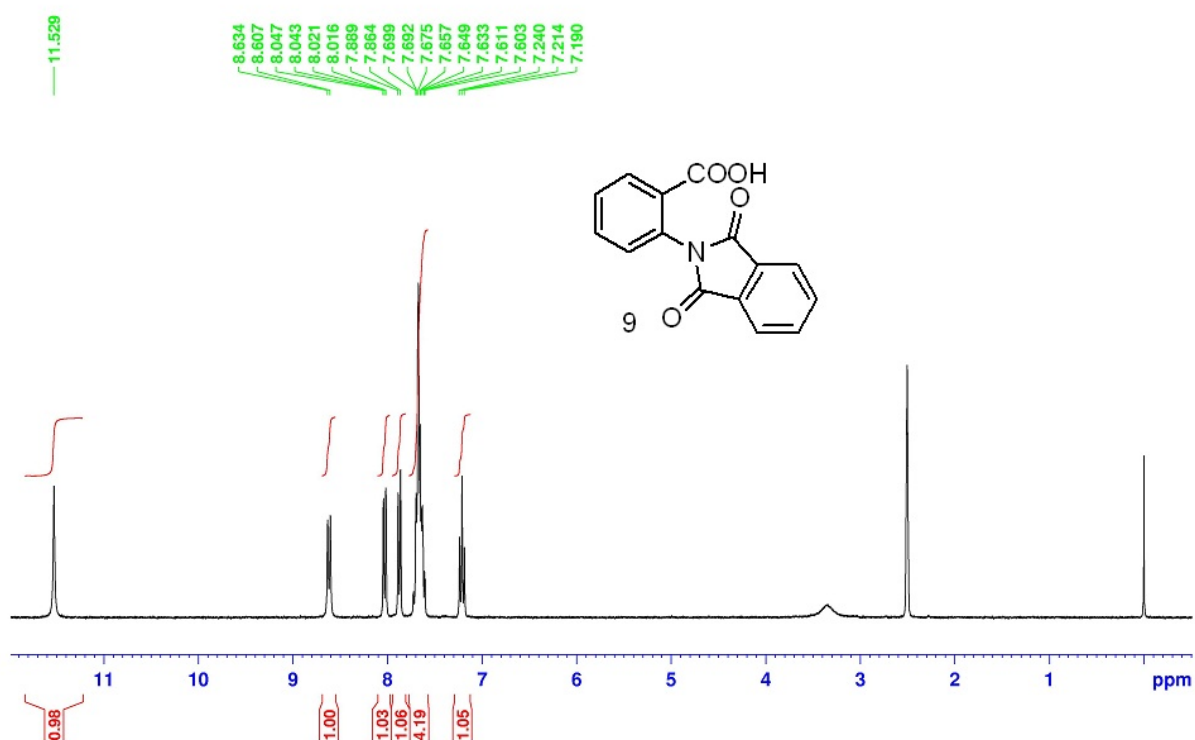

MS-V-64 in DMSO  
11/03/2014

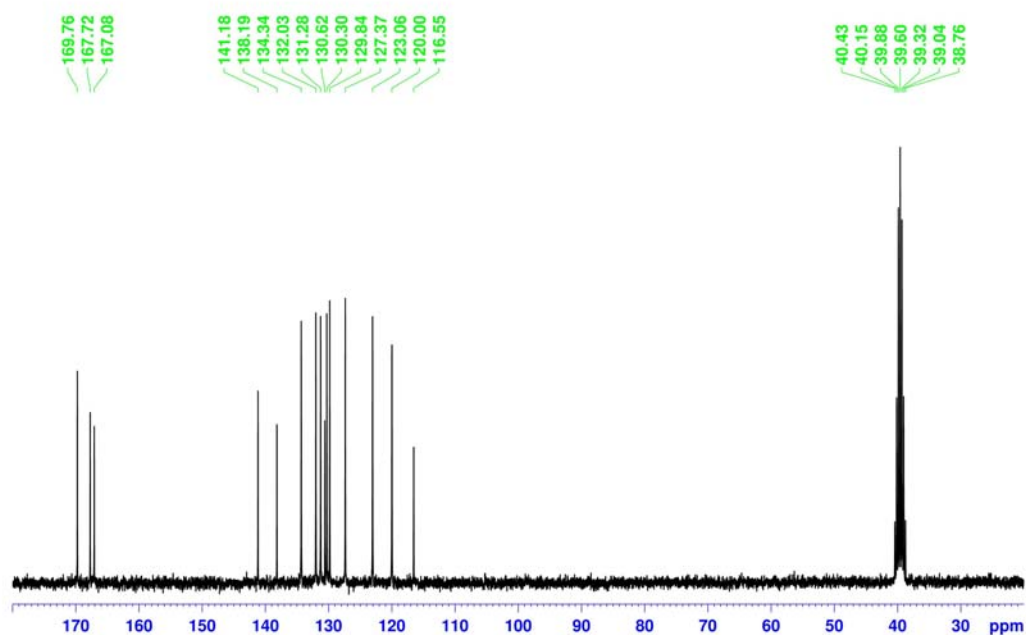

*N*-(2-bromo-4-methylphenyl)-2-(1,3-dioxisoindolin-2-yl)benzamide (10):  
HRMS

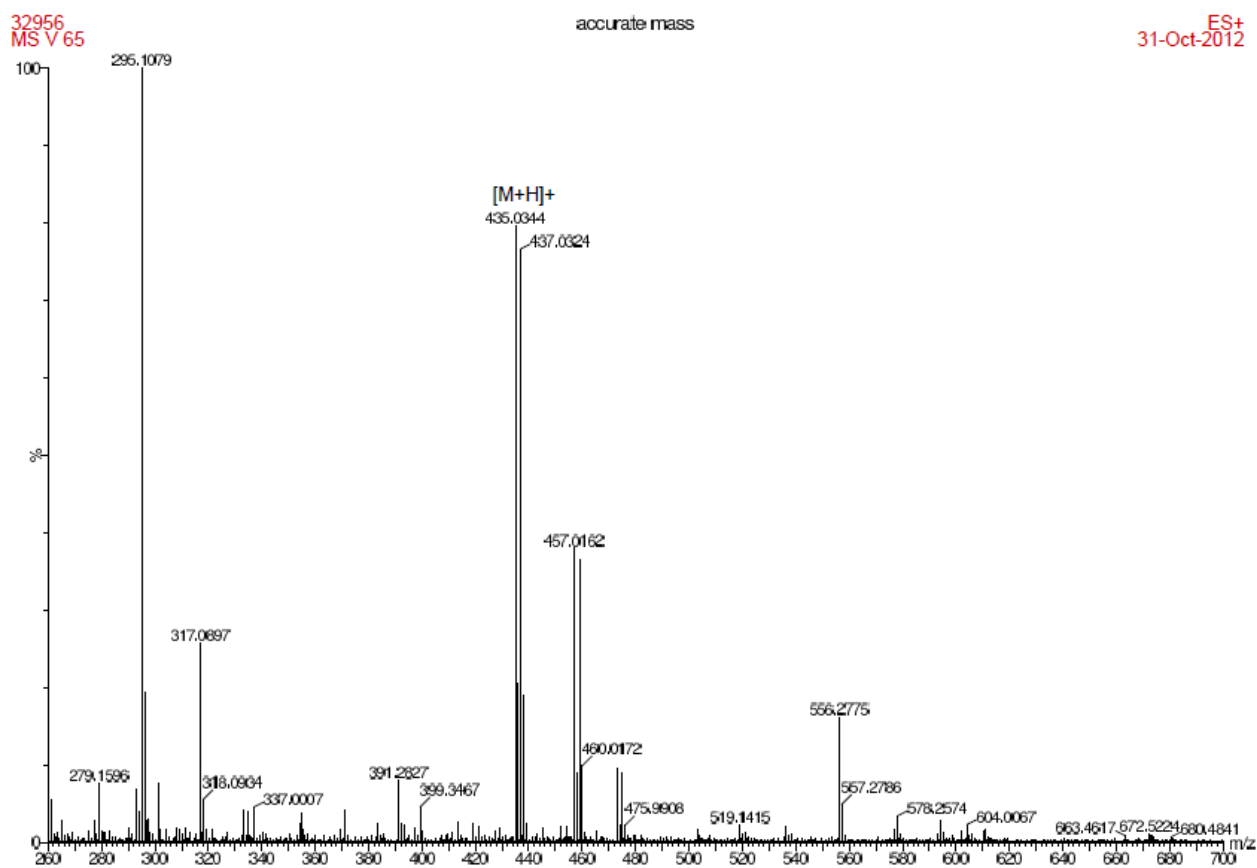

ES+  
31-Oct-2012

$^1\text{H}$  NMR (300 MHz,  $\text{CDCl}_3$ )

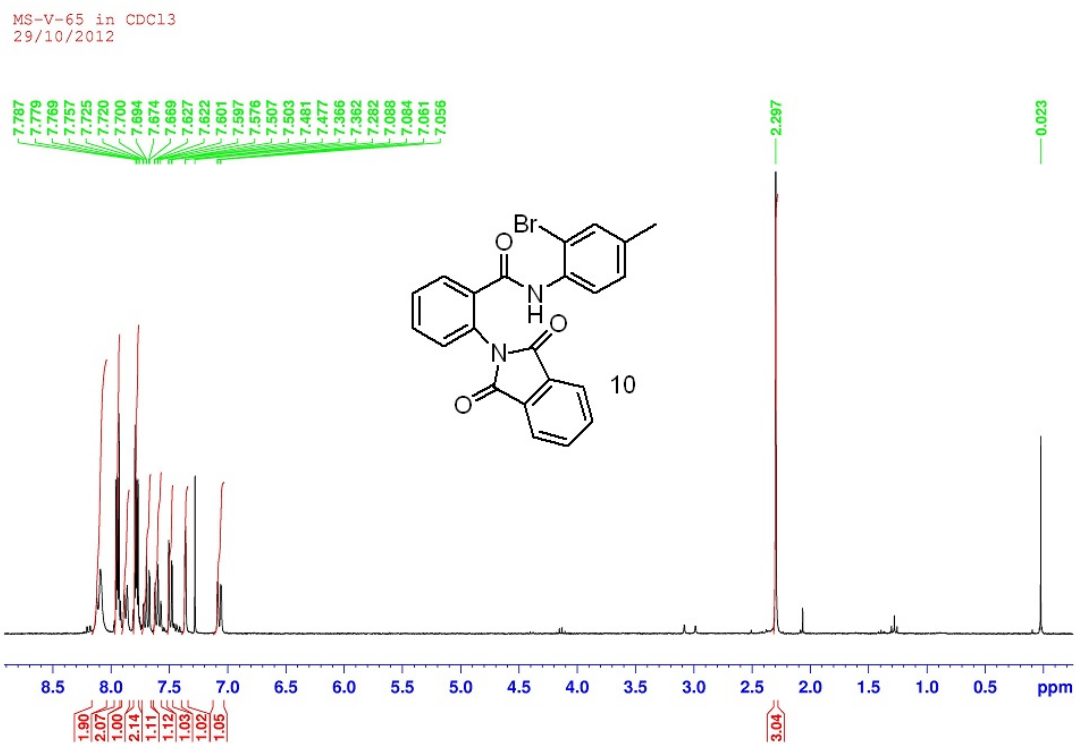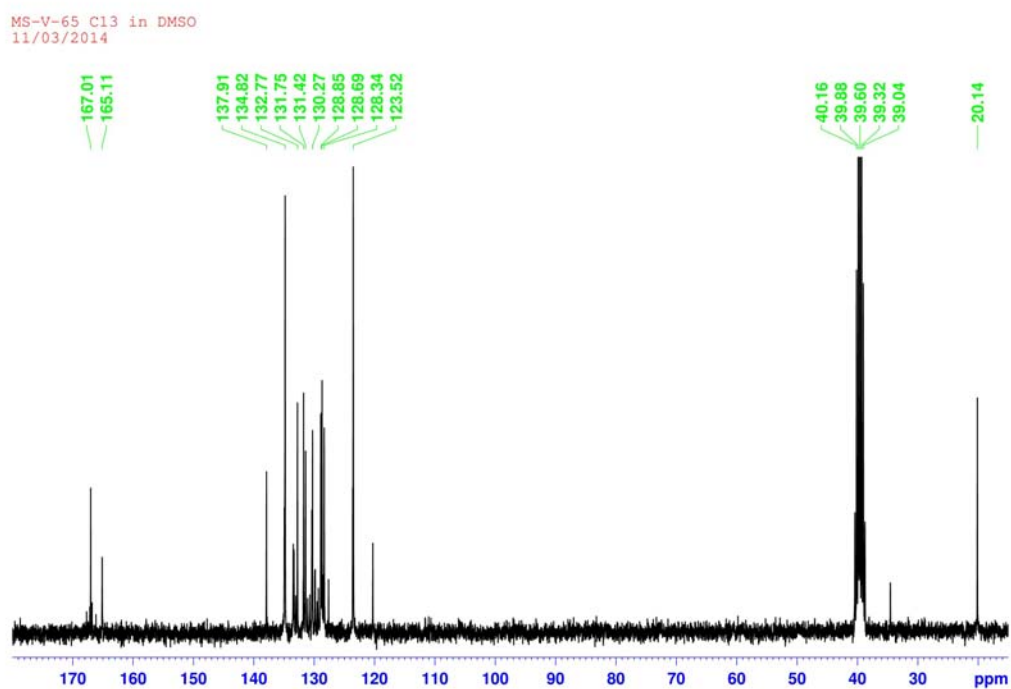

2-amino-*N*-(2-bromo-4-methylphenyl)benzamide (11)

HRMS

33026  
MS V73

ES+  
23-Nov-2012

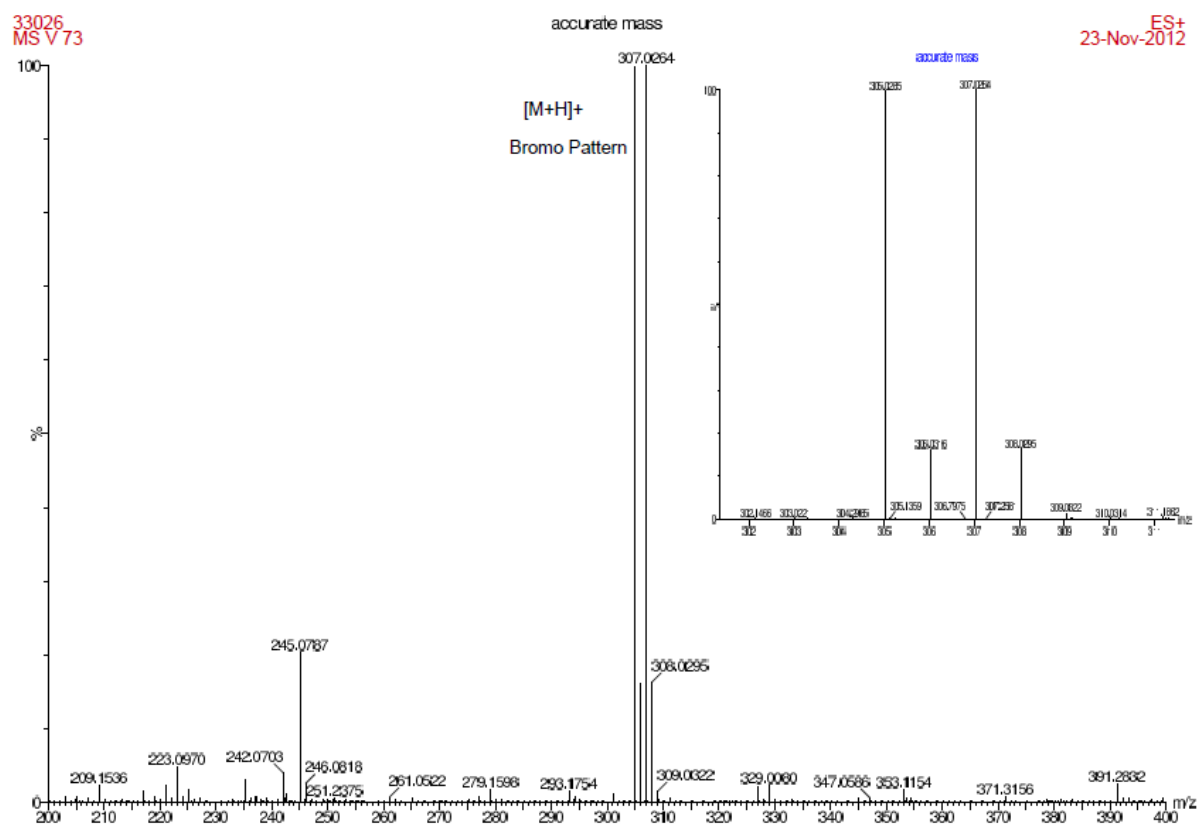

<sup>1</sup>H NMR (300 MHz, DMSO)

MS-V-73 in DMSO  
19/11/2012

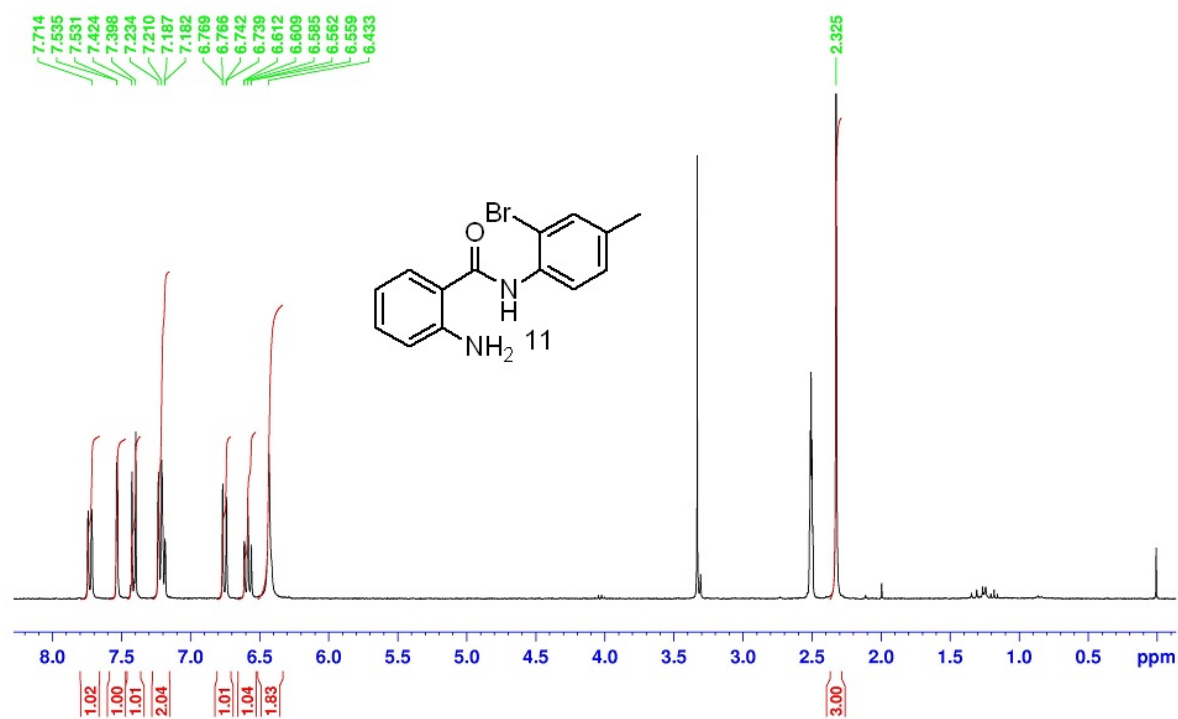



*N*-(2-bromo-4-methylphenyl)-2-(4-fluorobenzamido)benzamide (12)

HRMS

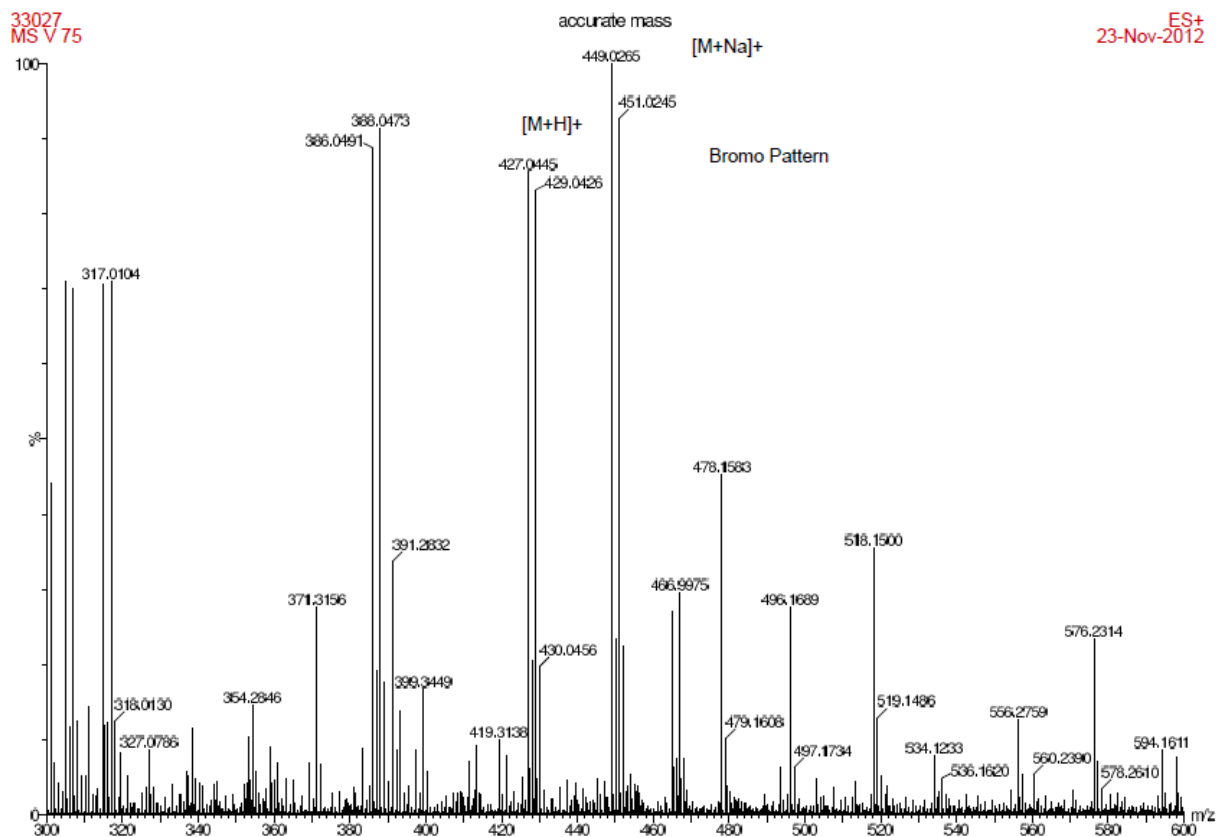

<sup>1</sup>H NMR (500 MHz, CDCl<sub>3</sub>)

MS-IV-75 in CDCl<sub>3</sub>  
proton spectrum  
temp=25C

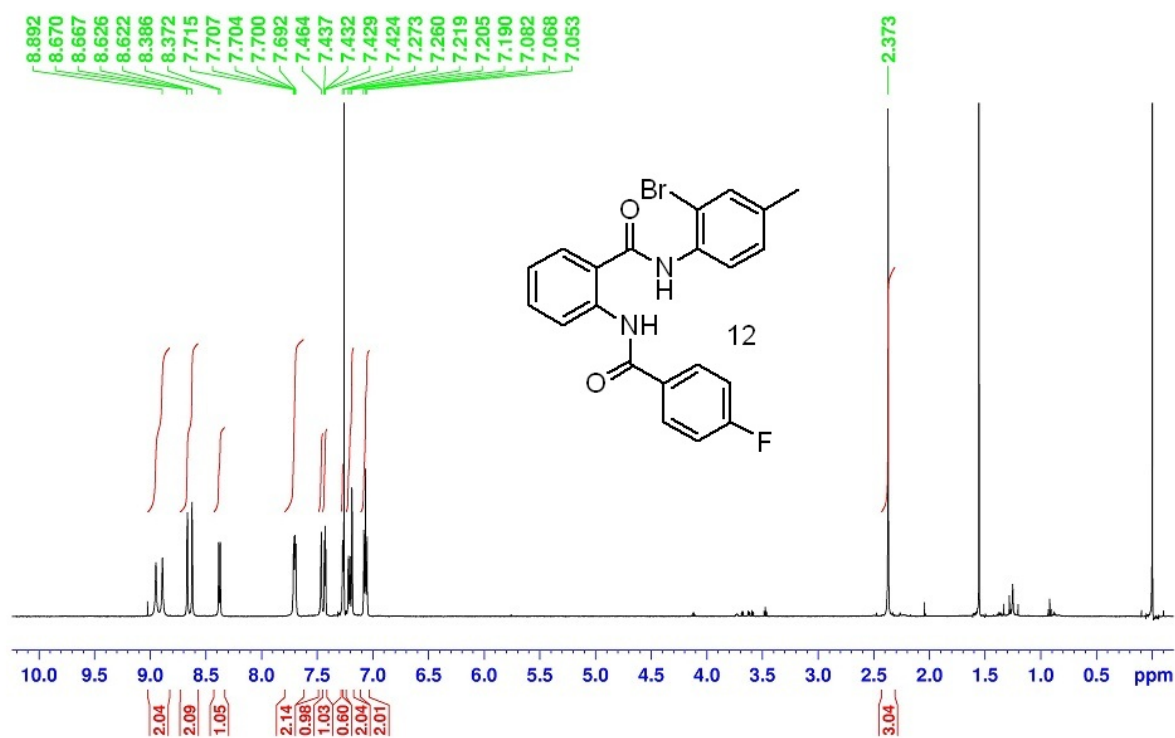

<sup>13</sup>C NMR (125 MHz, CDCl<sub>3</sub>)

MS-IV-75 in CDCl<sub>3</sub>  
temp = 25C  
13C

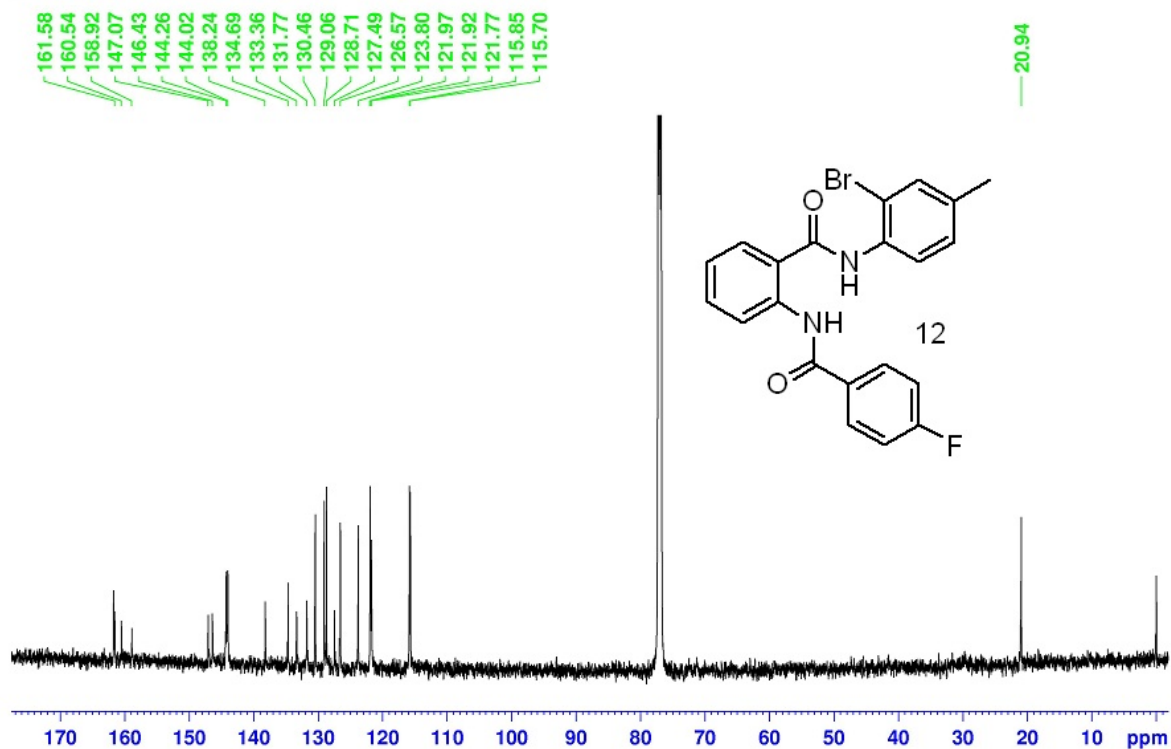

2-(4-fluorobenzamido)-N-(4-methyl-2-(thiophen-3-yl)phenyl)benzamide (13a)

HRMS

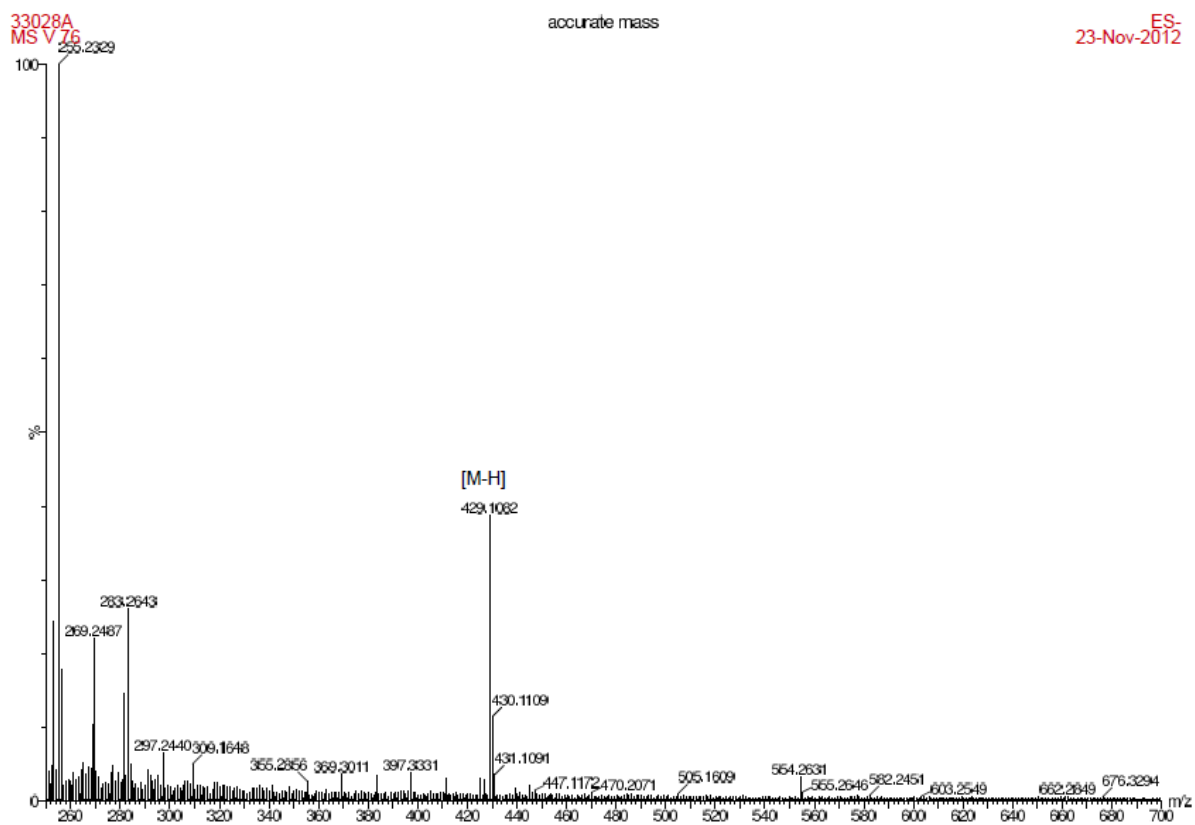

# <sup>1</sup>H NMR (300 MHz, CDCl<sub>3</sub>)

MS-V-76 in CDCl<sub>3</sub>  
23/11/2012

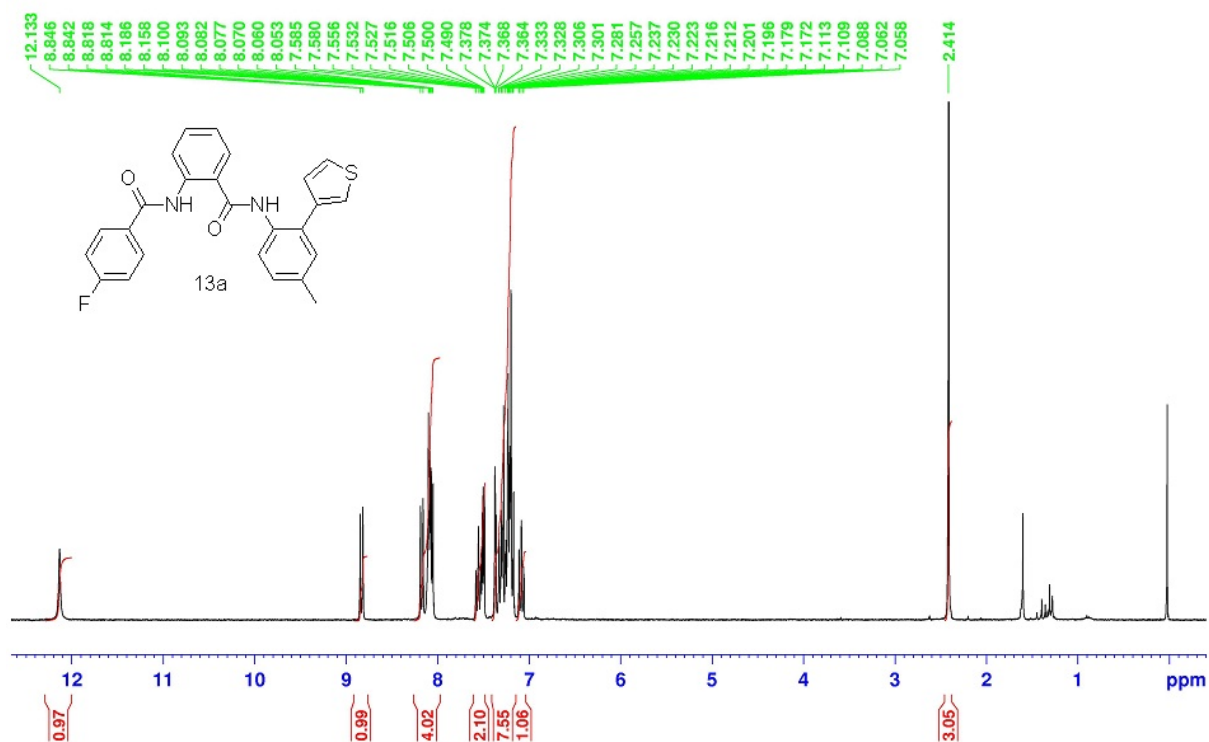

# <sup>13</sup>C NMR (75 MHz, CDCl<sub>3</sub>)

MS-V-76 C13 in CDCl<sub>3</sub>  
23/11/2012

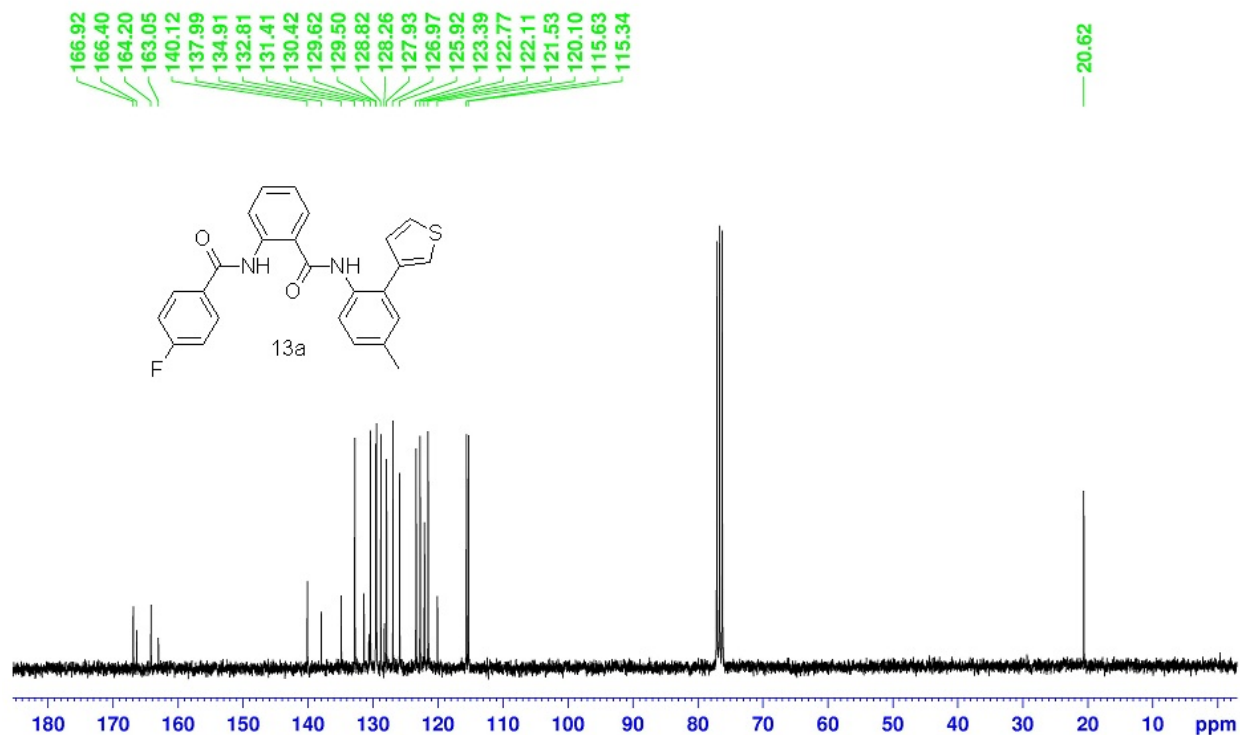

2-(4-fluorobenzamido)-*N*-(4-methyl-2-(5-methylthiophen-2-yl)phenyl)benzamide  
 (13b)  
 HRMS

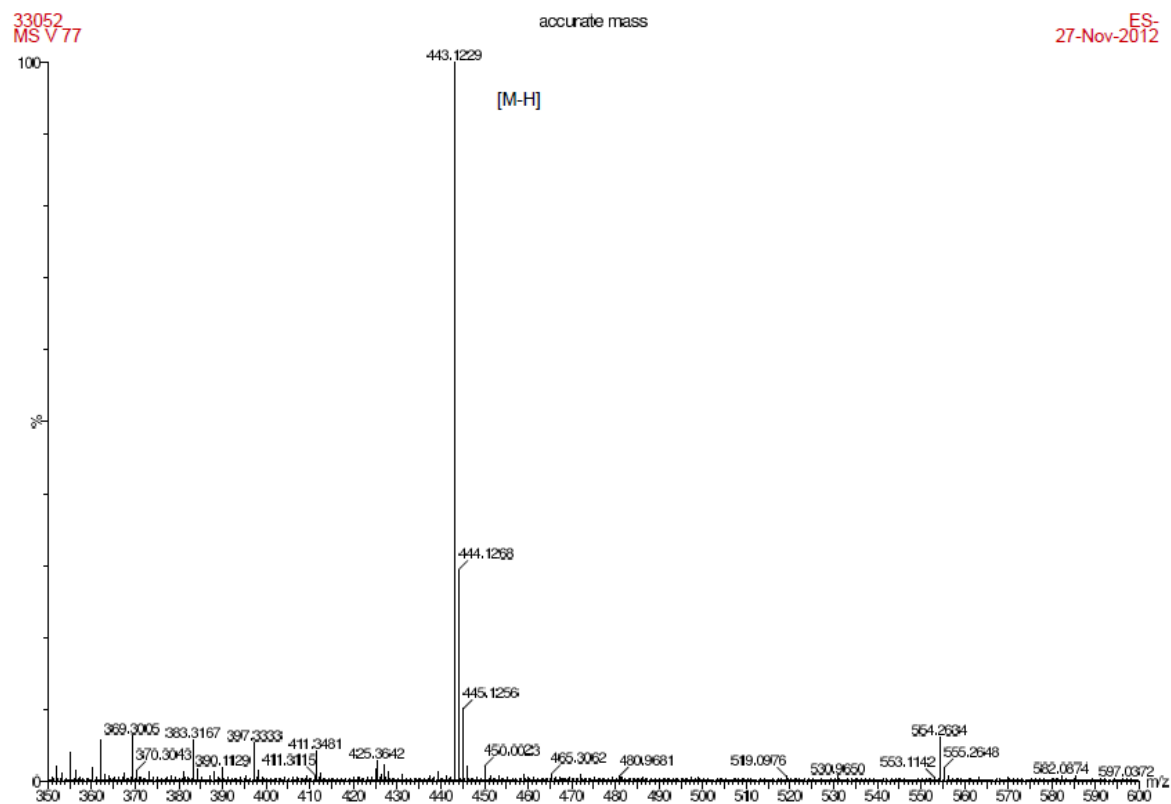

<sup>1</sup>H NMR (300 MHz, CDCl<sub>3</sub>)

MS-V-77 in CDCl<sub>3</sub>  
 26/11/2012

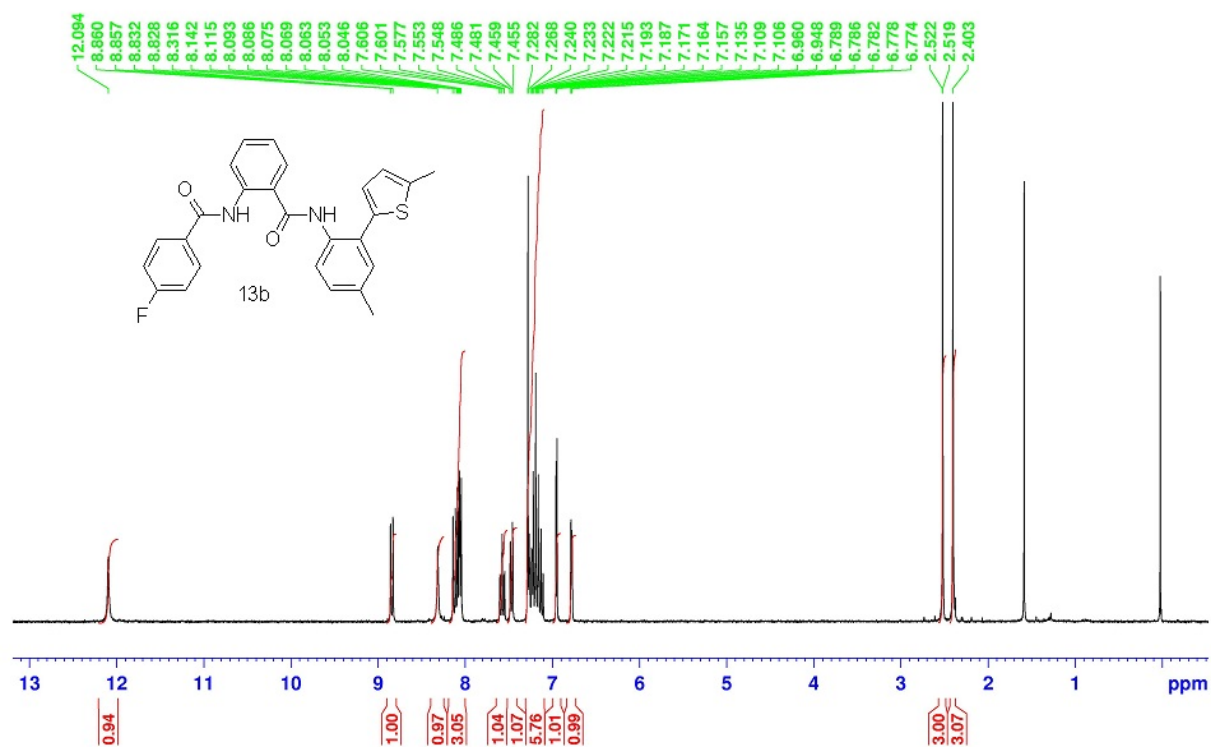

$^{13}\text{C}$  NMR (75 MHz,  $\text{CDCl}_3$ )

MS-V-77 C13 in  $\text{CDCl}_3$   
26/11/2012

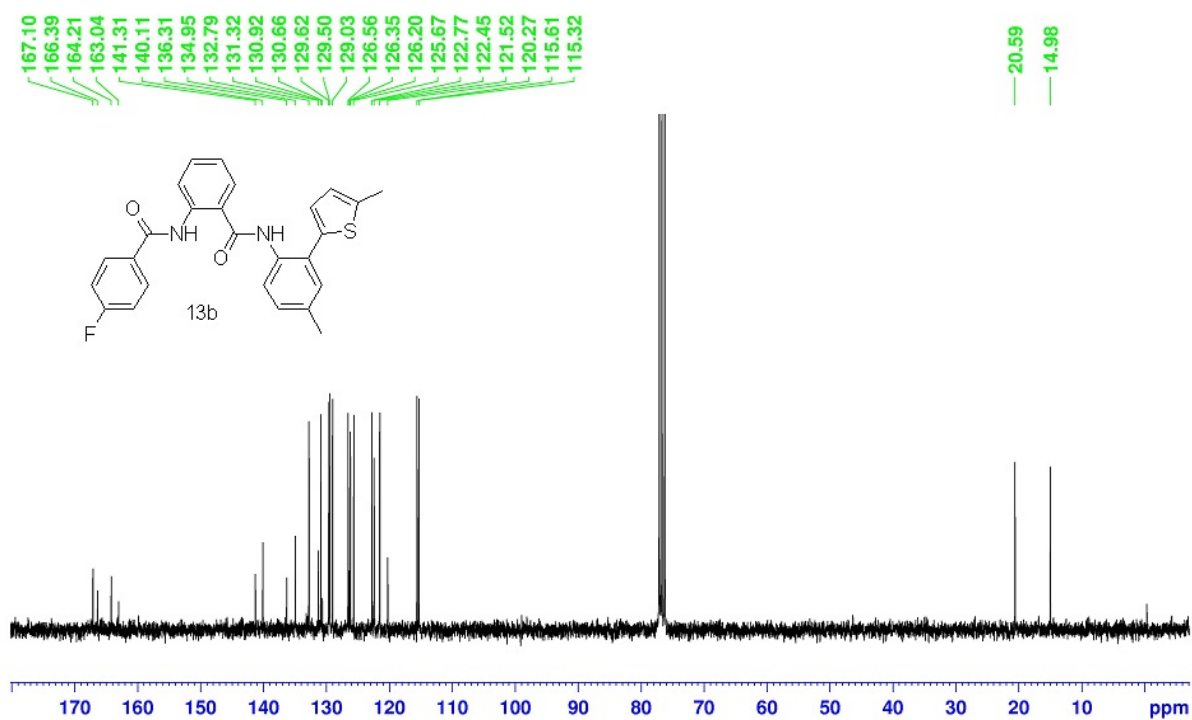

2-(4-fluorobenzamido)-*N*-(4-methyl-2-(pyridin-4-yl)phenyl)benzamide (13c)

HRMS

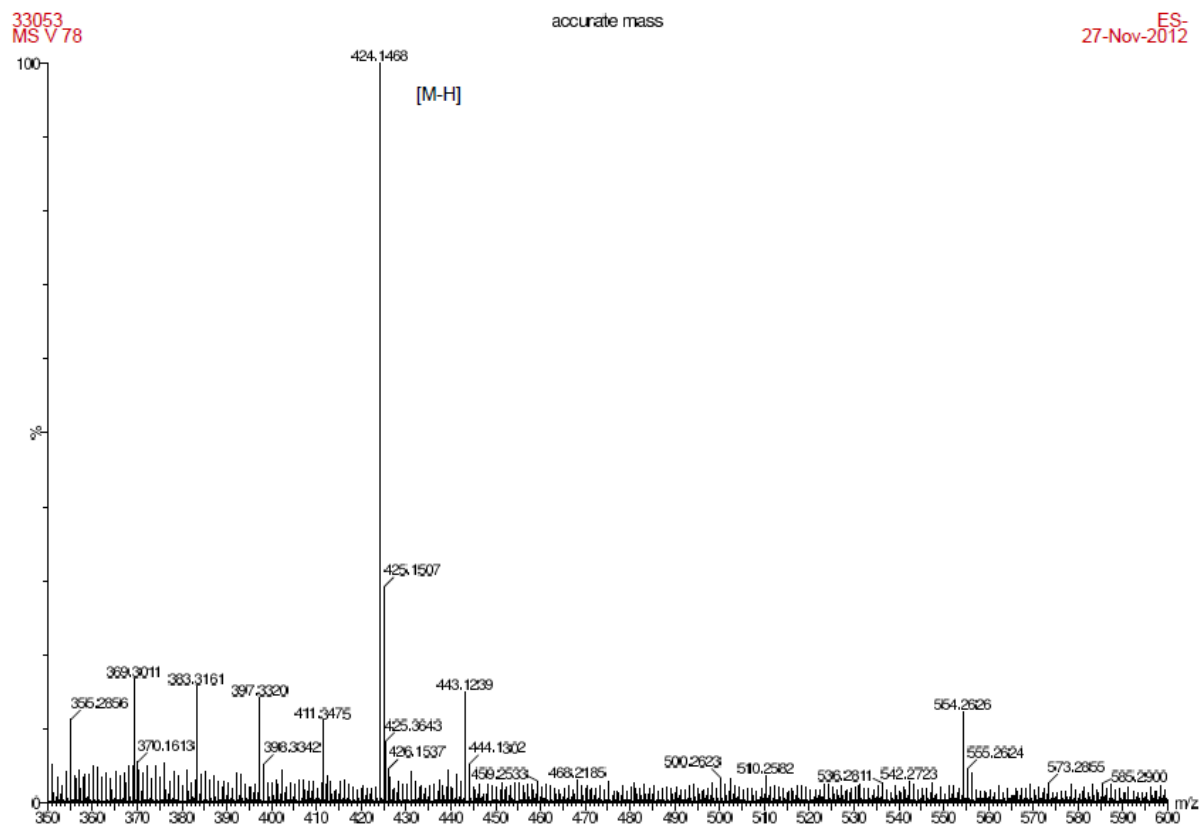

# <sup>1</sup>H NMR (300 MHz, CDCl<sub>3</sub>)

MS-V-78 in CDCl<sub>3</sub>  
26/11/2012

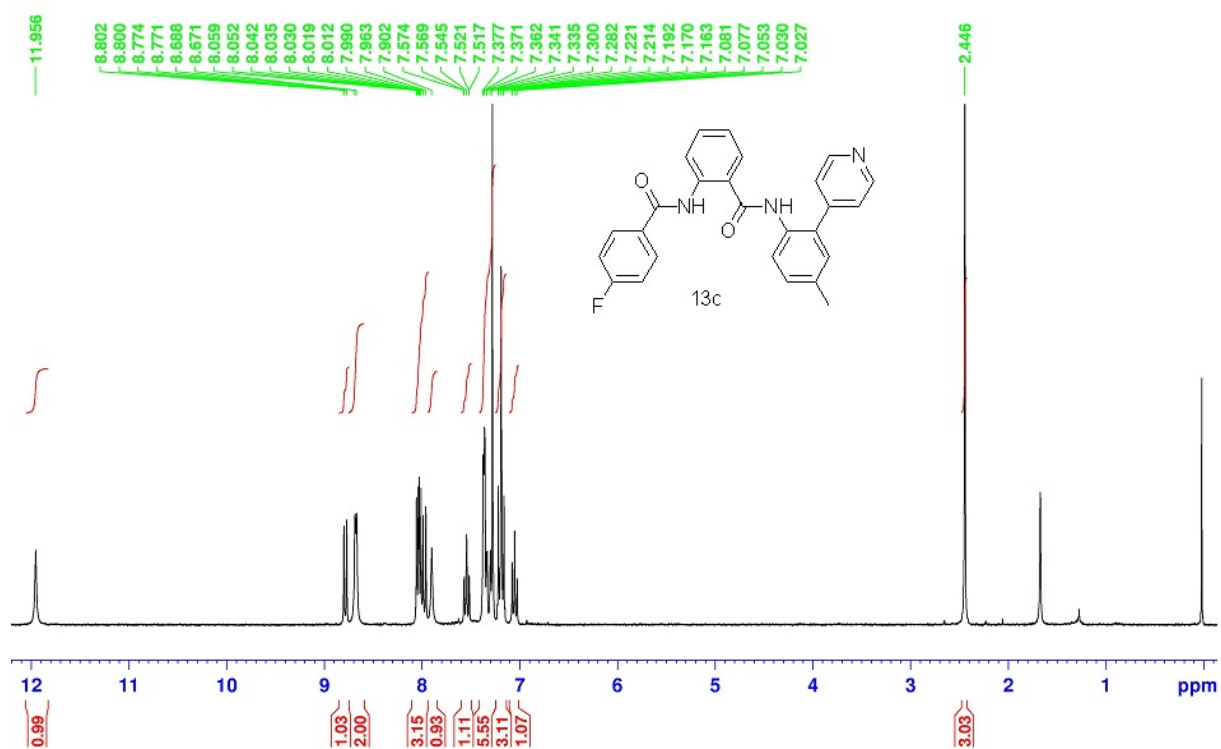

# <sup>13</sup>C NMR (75 MHz, CDCl<sub>3</sub>)

MS-V-78 C13 in CDCl<sub>3</sub>  
27/11/2012

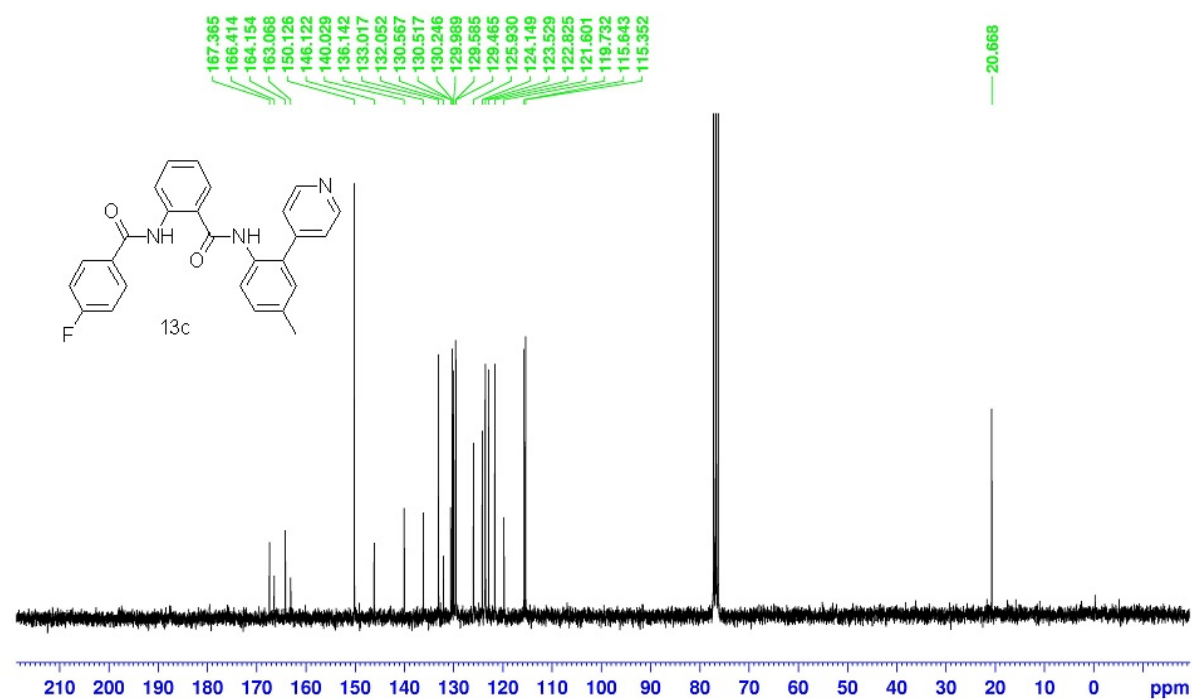

2-(4-fluorobenzamido)-*N*-(4-methyl-2-(pyridin-3-yl)phenyl)benzamide (13d)

HRMS

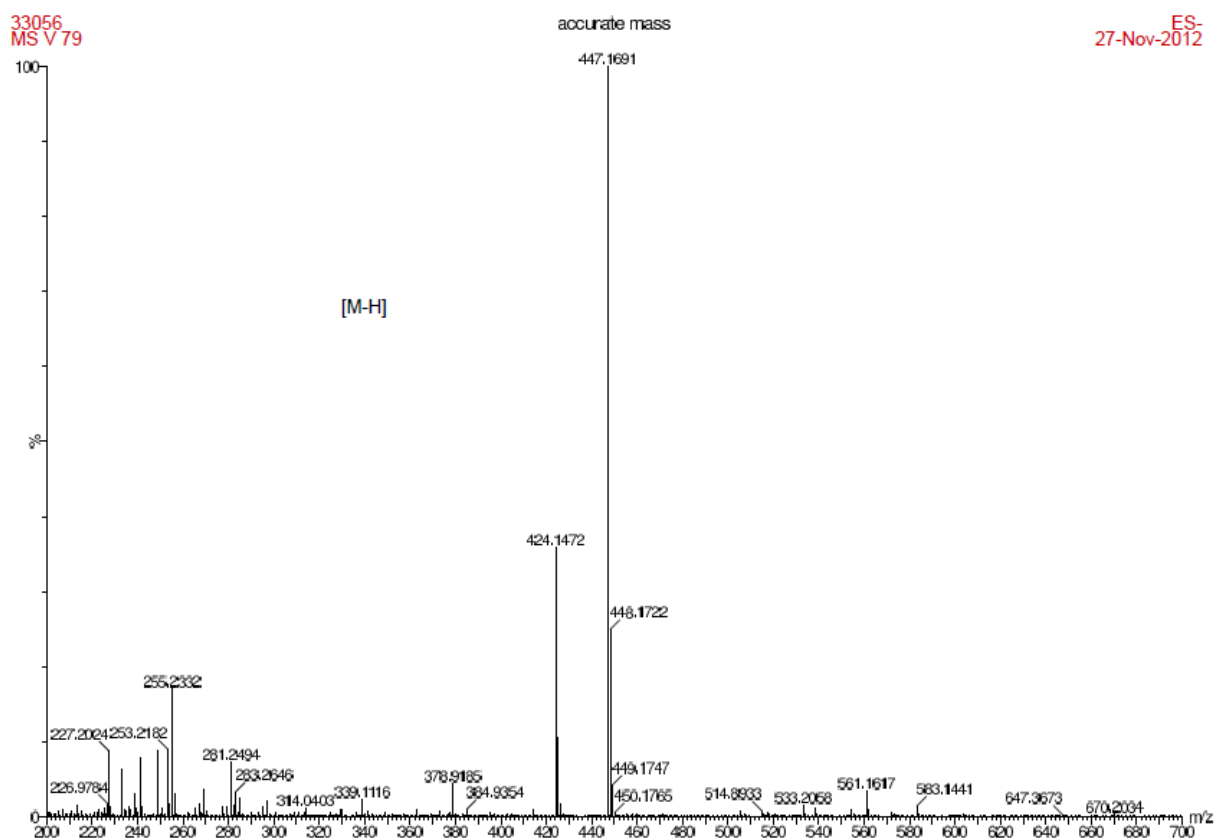

<sup>1</sup>H NMR (300 MHz, CDCl<sub>3</sub>)

MS-V-79 in CDCl<sub>3</sub>  
28/11/2012

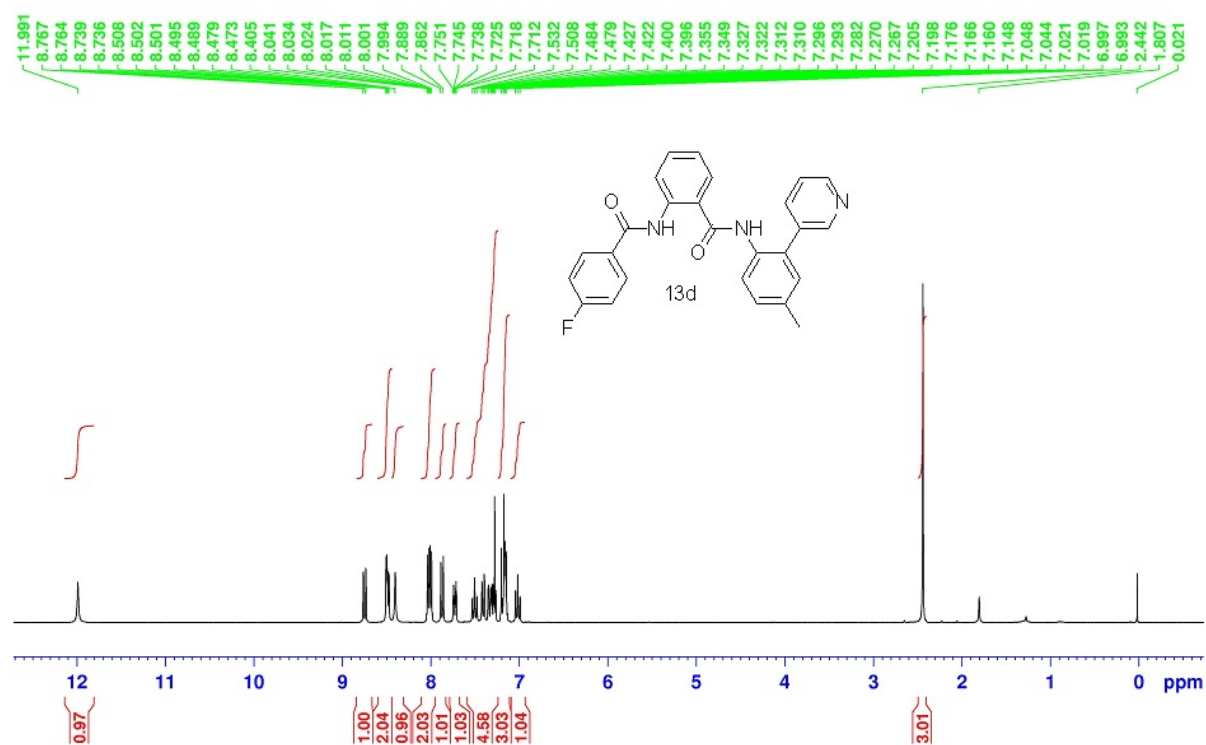

<sup>13</sup>C NMR (75 MHz, DMSO)

MS-IV-79 in DMSO  
temp = 20C  
13C  
1H decoupled

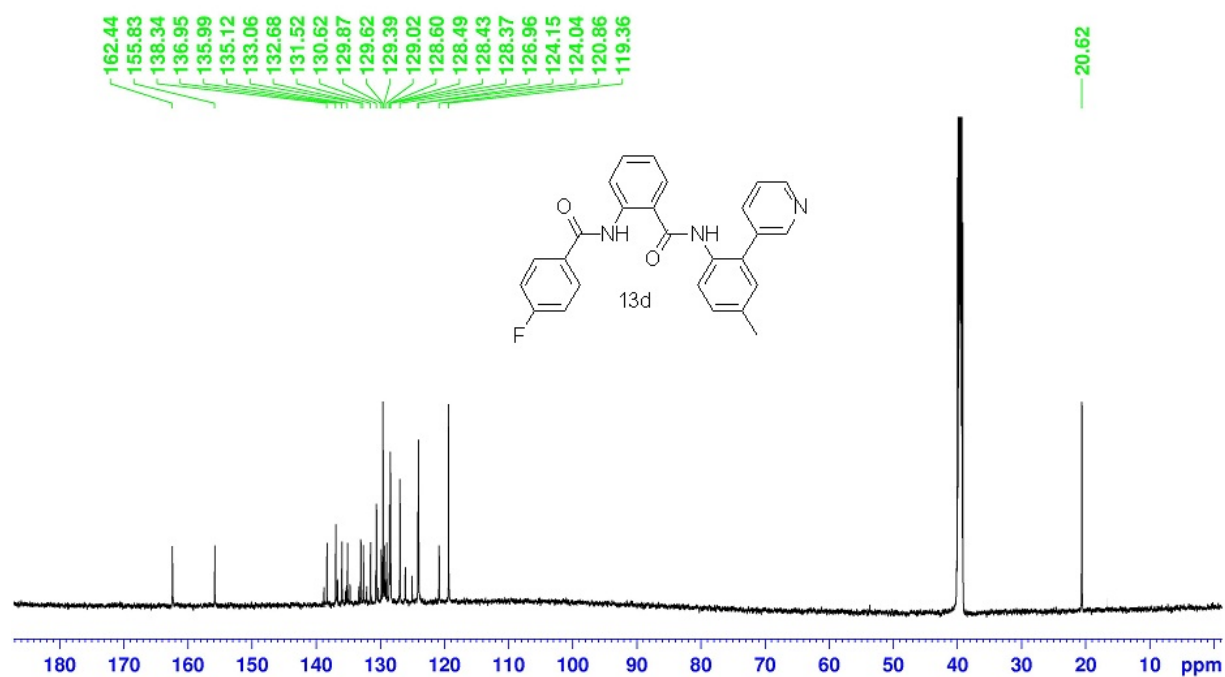

Supplement: mmc1.pdf [file mmc1.pdf]
